# Supplementary material
Source: publisher figshare collection journal article supplement (https://springernature.figshare.com/ndownloader/files/13564310)
Supplement: Supplementary file 1 [file 13564310]

mnemonic	year	X1_1_6_6_1	X1_1_7_6_1	X1_1_7_4_1	X1_1_9_3_1	X1_1_6_5_1	X1_1_7_2_1	X1_1_7_3_1	X2_2_1_1_1	X1_1_8_4_1	X1_1_4_6_1	X1_1_5_2_1	X1_2_1_1_1	X1_1_7_1_1	X1_2_2_2_1	X1_1_8_3_1	X1_1_8_5_1	X1_1_4_5_1	X1_1_9_1_1	X1_2_2_1_1	X1_1_1_2_2	X1_1_1_5_1	X1_1_4_2_1	X1_1_1_2_1	X1_1_7_7_1	X1_1_3_4_1	X1_1_2_5_1	X1_1_3_2_1	X1_1_2_1_1	X1_1_9_2_1	X1_1_2_6_1	X1_1_8_6_1	X1_1_6_3_1	X1_2_1_2_1	X1_1_2_4_1	X1_1_7_8_1	X1_1_6_2_1	X2_1_2_1_1	X1_1_2_5_2	X1_1_4_7_1	X1_1_4_3_1	X1_1_2_2_1	X1_1_8_1_1	X1_1_3_1_1	X2_1_1_1_1	X1_1_1_4_2	X1_1_6_1_1	X1_1_6_8_1	X1_2_2_3_1
E06000001	2012	0.463165358	0.562478821	0.575139783	0.352179451	0.164076419	0.177916253	0.59181361	1.817718787	0.308115563	0.388630836	0.243634948	0.339332767	0.358089603	0.837025478	0.739006531	0.251299235	0.817324647	0.014061054	0.101674636	0.900164349	0.933017757	0.798683064	1.169126797	0.333409469	0.495842984	0.376716785	0.111597997	0.818204865	0.067645265	2.209285427	0.059288269	0.230067978	0.206771743	0.992716393	0.685680661	0.194192543	1.490190035	0.472458815	0.291790478	0.100641429	0.310044572	0.127242824	0.314950013	0.764034676	0.331752929	0.204428815	0.250082756	0.519083209
E06000002	2012	0.424971576	0.530054928	0.54654732	0.324818403	0.158381796	0.165959603	0.569309716	1.738611256	0.288244108	0.362190411	0.22257491	0.30324433	0.341937528	0.81007077	0.691574623	0.233238249	0.754642433	0.013070393	0.101452869	0.842783817	0.891591431	0.73373252	1.092368368	0.306284787	0.454523261	0.342987273	0.101127573	0.732987715	0.073559754	2.007193819	0.055455574	0.218964075	0.192981544	0.947601129	0.63994768	0.186271426	1.318576971	0.419111822	0.282706998	0.101099584	0.287501069	0.123183447	0.303369802	0.686173866	0.309323222	0.199438191	0.243573536	0.48391703
E06000003	2012	0.479871079	0.575945153	0.592014822	0.352403288	0.169020016	0.186230507	0.607116488	1.808901337	0.307713252	0.397631378	0.248018527	0.348450881	0.365246452	0.81604354	0.750750808	0.257173118	0.835276537	0.014292471	0.10017209	0.918562509	0.938473793	0.826903447	1.191823758	0.34717563	0.509892986	0.383077032	0.114561859	0.842646643	0.066381544	2.261505017	0.058199368	0.235916927	0.213267082	1.014158281	0.690059042	0.201043551	1.550008181	0.484488506	0.2998958	0.093370389	0.318151822	0.128786538	0.331593378	0.781918477	0.330142632	0.214750603	0.260191122	0.516771302
E06000004	2012	0.463630645	0.564300316	0.575621352	0.340875316	0.167329559	0.176407572	0.597897245	1.6923728	0.298274683	0.384822006	0.232761727	0.329064296	0.364885977	0.801801686	0.731579565	0.248580148	0.814022285	0.014551081	0.102539026	0.88483344	0.930717762	0.782271772	1.1464493	0.321201476	0.489867229	0.371766531	0.115334688	0.796909524	0.068802962	2.14640708	0.057177006	0.232769302	0.198706188	0.993098115	0.668603815	0.194185901	1.542524073	0.456064235	0.289056195	0.101598268	0.299539373	0.120718015	0.319918602	0.735979136	0.332462174	0.208042147	0.254210184	0.517377907
E06000005	2012	0.46424533	0.571375578	0.580287424	0.34899024	0.165183334	0.17943635	0.598651314	1.783315458	0.30377558	0.388636039	0.239039807	0.339478327	0.362713113	0.82054092	0.742830258	0.251662283	0.818714178	0.014291959	0.103839264	0.901870838	0.932098434	0.798191371	1.169035244	0.334116076	0.495006319	0.376784399	0.111315853	0.814952315	0.06976982	2.186658081	0.057798688	0.233444523	0.207566535	0.996508993	0.679944841	0.196727734	1.533033477	0.468098663	0.294771023	0.103264384	0.306107071	0.127241149	0.323507647	0.749553079	0.331044923	0.21018238	0.258904499	0.515570201
E06000006	2012	0.460942974	0.56557234	0.57541456	0.345563767	0.162212945	0.174121637	0.589369247	1.753509036	0.299453068	0.383675549	0.235654385	0.329575395	0.36037321	0.813990818	0.735378773	0.247631217	0.817616547	0.014343937	0.10084143	0.88551613	0.924756842	0.78315864	1.154435046	0.327796866	0.490411268	0.374772577	0.111964783	0.812979363	0.065023394	2.175999546	0.057609703	0.23057847	0.199514004	0.997681442	0.676862968	0.192949081	1.542382641	0.464111522	0.287203004	0.103416495	0.301867205	0.120840942	0.311901709	0.741730922	0.337923343	0.2042364	0.251408762	0.51609686
E06000007	2012	0.47362807	0.573440828	0.583382115	0.338398636	0.172950559	0.179395175	0.611478359	1.635705785	0.299703392	0.387293129	0.230507693	0.33385667	0.376465084	0.80040201	0.743712739	0.25114808	0.822225025	0.015035175	0.105752743	0.896259655	0.940358585	0.787422942	1.153978476	0.321276765	0.495594129	0.374218649	0.118675196	0.807993879	0.070907828	2.142608861	0.056698789	0.238094565	0.199771439	1.003678842	0.66937806	0.196998775	1.630397521	0.460197108	0.291881713	0.099328787	0.298264854	0.119424292	0.329556912	0.73581147	0.337506113	0.212969932	0.263919979	0.527672229
E06000008	2012	0.403010469	0.503387398	0.534846468	0.298994683	0.170840645	0.159505941	0.587749211	1.565768826	0.277593457	0.339467429	0.200612453	0.271217291	0.348663475	0.780818902	0.65095006	0.220623544	0.696411607	0.011534459	0.10538221	0.802935361	0.883751621	0.677437811	1.029853854	0.281836237	0.418248427	0.31317389	0.102239303	0.662525706	0.088081976	1.764143619	0.051626099	0.219402561	0.182545376	0.943737741	0.600930162	0.188832373	1.167221544	0.360738018	0.284641757	0.105301522	0.267586295	0.12089195	0.322540914	0.594851476	0.28440026	0.208827649	0.252279617	0.464948841
E06000009	2012	0.456680854	0.5670814	0.575965796	0.34175787	0.165172111	0.178252539	0.596048585	1.828737255	0.296783557	0.385032757	0.238679997	0.336265582	0.358850639	0.811756999	0.734884077	0.246976473	0.806897552	0.013830711	0.100420032	0.895076322	0.912426062	0.800926658	1.163090516	0.33800034	0.496873231	0.370408576	0.108430451	0.809545712	0.067763666	2.184485817	0.055713263	0.231227602	0.209122027	0.992518617	0.671817618	0.197536849	1.491949653	0.46440403	0.29492751	0.092711647	0.308228511	0.128388738	0.321044848	0.763843969	0.321444124	0.211633384	0.254470045	0.500050516
E06000010	2012	0.412383453	0.529941343	0.531616948	0.322902868	0.148044998	0.158593303	0.548623312	1.798656297	0.280869492	0.358384483	0.219393893	0.305830847	0.334211806	0.805754443	0.68653195	0.231086475	0.755757628	0.013286063	0.097746863	0.823345337	0.866709894	0.72609939	1.080165396	0.302817596	0.450087267	0.348698808	0.096893843	0.725486753	0.065258784	2.01906285	0.054886237	0.213970222	0.185883543	0.924940084	0.637220402	0.180859265	1.333666015	0.423602955	0.272417349	0.095367309	0.283053138	0.11768856	0.285098097	0.695247612	0.313932502	0.189584684	0.229714054	0.47745431
E06000011	2012	0.507539097	0.592100065	0.612650857	0.352168222	0.181795715	0.197017281	0.636257219	1.659873113	0.30768559	0.400693785	0.249825638	0.361793348	0.385218295	0.781834041	0.760951289	0.260282446	0.85633343	0.015183453	0.104294069	0.934750636	0.954716364	0.846878236	1.204254771	0.35217256	0.528931915	0.387381222	0.12711644	0.870418023	0.068912754	2.281119076	0.056437531	0.245922081	0.218591291	1.032945591	0.68431584	0.206457265	1.728583077	0.498203342	0.304767782	0.089509869	0.318925973	0.126429015	0.359859213	0.793019357	0.331632926	0.226844334	0.278821519	0.529356978
E06000012	2012	0.455833538	0.555596599	0.567787176	0.340415488	0.160316825	0.175700917	0.580478416	1.755613036	0.297659332	0.381296499	0.235724936	0.332794913	0.352089945	0.797032565	0.728103958	0.246654573	0.802686141	0.013902386	0.097852481	0.882239747	0.902252592	0.785925946	1.144633839	0.32947199	0.487380008	0.366396167	0.110310779	0.802995625	0.064361155	2.170447894	0.05659717	0.227157771	0.202455492	0.968209297	0.665823817	0.191803895	1.504357414	0.465260742	0.284885137	0.093780231	0.302483949	0.122287499	0.312140229	0.740673839	0.324880615	0.202932035	0.248660727	0.503007674
E06000013	2012	0.474988948	0.566958373	0.580070117	0.34045587	0.171290145	0.180823502	0.603402064	1.652314475	0.296134538	0.380974812	0.234568559	0.33743846	0.367957349	0.782356598	0.73135422	0.24817157	0.814600318	0.014830524	0.10178727	0.888264051	0.922164709	0.793078523	1.146956656	0.327772662	0.498105227	0.369668688	0.117107855	0.813634903	0.067275946	2.164734133	0.055507903	0.233949191	0.203539183	0.990799516	0.662505503	0.196090523	1.611957908	0.467897031	0.28992671	0.098020124	0.29915964	0.120074243	0.330809618	0.747594181	0.328045696	0.212564499	0.261407469	0.514068891
E06000014	2012	0.46172369	0.564601481	0.569415148	0.335089377	0.168459949	0.175195476	0.594748353	1.643802737	0.290011316	0.373076654	0.226275913	0.328355373	0.371497038	0.789527244	0.73171357	0.241699481	0.79879956	0.015759452	0.104585258	0.872278536	0.910217982	0.768115157	1.126368256	0.313058047	0.487950299	0.361530857	0.11209796	0.785165292	0.068243812	2.111119193	0.05471215	0.230559947	0.198237857	0.969328081	0.648175088	0.191213328	1.599651101	0.456246847	0.284747872	0.093707132	0.287566569	0.116621606	0.321182333	0.730805007	0.331669663	0.206102968	0.259505868	0.513640848
E06000015	2012	0.431435281	0.536401961	0.545371998	0.320321661	0.172814101	0.164770153	0.588232433	1.590286885	0.283191004	0.355585577	0.213337378	0.297004847	0.361334116	0.791196518	0.683743012	0.231693677	0.742655878	0.014289044	0.107889285	0.833470362	0.905240522	0.720561664	1.069202393	0.290174512	0.454121332	0.33356123	0.107461544	0.711168941	0.079008306	1.926570512	0.054537266	0.224770941	0.18885941	0.961264226	0.621157446	0.189347295	1.372449082	0.398701037	0.283980202	0.10527995	0.275420734	0.119356561	0.318835144	0.671400258	0.308007144	0.206778523	0.256245202	0.498260979
E06000016	2012	0.366066542	0.480881076	0.519173402	0.268169668	0.19181507	0.148649329	0.614082382	1.382273541	0.253573777	0.299712175	0.176871367	0.23086211	0.358578532	0.775534788	0.584470839	0.200915921	0.625938247	0.011209907	0.117786101	0.733572877	0.875491523	0.593252879	0.937480588	0.242108651	0.376419638	0.261657036	0.096178162	0.537951415	0.112208929	1.45238092	0.047826541	0.2146829	0.166182617	0.919695899	0.536805102	0.186773929	0.947213011	0.27865023	0.290141713	0.098867201	0.252228089	0.121163554	0.334483808	0.512594127	0.252532177	0.219110974	0.270290154	0.448101911
E06000017	2012	0.529112193	0.610045625	0.636868023	0.375436578	0.191384478	0.208205805	0.658579604	1.684012258	0.323460725	0.42060246	0.26138835	0.375895009	0.401373802	0.801797477	0.782589983	0.268355326	0.889507602	0.015116641	0.106933221	0.968386224	1.006149192	0.883909714	1.248067138	0.364028774	0.551551429	0.402529827	0.132202991	0.908878033	0.072174371	2.355962888	0.05983115	0.256429222	0.227606549	1.08538276	0.710147531	0.215025524	1.809165035	0.515688033	0.32012335	0.099817529	0.330815487	0.132048858	0.375350783	0.80234154	0.344563147	0.235362745	0.300041969	0.555999026
E06000018	2012	0.37171838	0.493430886	0.495041172	0.289370386	0.153123956	0.143285652	0.534916481	1.676686632	0.259528964	0.320865614	0.198495787	0.263578093	0.326178787	0.79981208	0.616491101	0.209815975	0.664918684	0.012661172	0.107116961	0.753471099	0.832005615	0.645228411	0.984793675	0.265259266	0.406481797	0.302613928	0.085834193	0.624996528	0.075489633	1.743264884	0.052578489	0.204178166	0.172972841	0.892104766	0.572535957	0.174183675	1.140528193	0.3524928	0.270472238	0.089517922	0.249743693	0.116590517	0.283802333	0.626258184	0.284139236	0.188227023	0.230900749	0.458462428
E06000019	2012	0.504763803	0.60475774	0.619153222	0.35706032	0.180773145	0.200717033	0.637812997	1.758407537	0.312399622	0.40677956	0.253649829	0.368165104	0.385268377	0.799396124	0.774037773	0.262508216	0.86521929	0.014773879	0.105200061	0.952136158	0.965058967	0.863131216	1.229440681	0.362229421	0.533194868	0.39828829	0.120020586	0.876703589	0.069737739	2.311421494	0.056832659	0.248982764	0.226487566	1.042276622	0.698411485	0.209867946	1.713145808	0.503869864	0.313173187	0.091170403	0.32553167	0.131753814	0.359256424	0.788001102	0.336048002	0.22943719	0.285757517	0.53050218
E06000020	2012	0.459386433	0.568182973	0.576250522	0.346706523	0.167660011	0.175647385	0.601051762	1.735568196	0.302450087	0.38494405	0.231326297	0.325503221	0.366831698	0.829635993	0.73527141	0.248887037	0.813401682	0.014022842	0.105553668	0.887281416	0.940075914	0.780292408	1.154838191	0.322841979	0.483376268	0.372489996	0.112366044	0.799543075	0.071489314	2.127020885	0.058258504	0.234518514	0.198088239	1.006414341	0.675452967	0.195326583	1.516039749	0.455517838	0.290942954	0.112198766	0.300689515	0.122047679	0.32188144	0.728373893	0.335945215	0.207970083	0.258154698	0.520405721
E06000021	2012	0.442378997	0.552449767	0.561733477	0.335949359	0.164463998	0.171541346	0.588207063	1.766761901	0.293918729	0.373876238	0.229066109	0.316158775	0.357078005	0.825151155	0.713360065	0.240647559	0.78212047	0.013481477	0.104334298	0.866901093	0.913144421	0.765740392	1.129451132	0.319165298	0.475259255	0.357601726	0.105297313	0.770817495	0.071969103	2.077072563	0.056220024	0.22854082	0.198798648	0.980659533	0.657707574	0.19384871	1.421174342	0.438322834	0.290491282	0.105392318	0.296489755	0.124921189	0.315208771	0.711175478	0.320783875	0.206063425	0.253224852	0.500154144
E06000022	2012	0.474045334	0.574525157	0.583558116	0.33683828	0.176506114	0.184078023	0.612544367	1.632817378	0.295442665	0.38045058	0.232449415	0.33702766	0.380407181	0.782737988	0.733232163	0.246062682	0.813136862	0.015258141	0.106001231	0.891140677	0.933826617	0.792281798	1.148464579	0.322429469	0.501672959	0.368443521	0.117673314	0.802232381	0.070823148	2.136582349	0.054796138	0.236791459	0.205316442	0.993773038	0.65487162	0.197559217	1.635657812	0.461965908	0.294947553	0.08827648	0.296452911	0.121550009	0.338573008	0.7403387	0.329296354	0.216617952	0.271534703	0.523453541
E06000023	2012	0.411758483	0.534122068	0.530941178	0.311315787	0.163836676	0.15526622	0.565368102	1.631504842	0.271823973	0.34385174	0.205365953	0.28884073	0.358832239	0.795974368	0.6733329	0.223927921	0.732565671	0.01461629	0.106982289	0.802620805	0.87496552	0.691935266	1.045389829	0.27826738	0.44419538	0.329955072	0.100037586	0.686477383	0.073002205	1.881748764	0.052312519	0.218178266	0.179213614	0.93081035	0.602610549	0.181032002	1.387044237	0.396025862	0.277365149	0.095452624	0.264420587	0.112992157	0.298039755	0.660674348	0.314974046	0.195831708	0.24575026	0.491088173
E06000024	2012	0.507947754	0.591389434	0.611203865	0.355164306	0.182100368	0.195634905	0.638059507	1.643624782	0.312243924	0.40442275	0.248100526	0.361692983	0.388393064	0.794692918	0.76909884	0.260409248	0.857006709	0.015986281	0.107110227	0.93944942	0.964107866	0.844113037	1.203362916	0.348151377	0.528270224	0.389322361	0.126192344	0.862539374	0.07007644	2.271671975	0.057585152	0.244893614	0.218391992	1.027182108	0.683328159	0.206825501	1.737948825	0.491512104	0.305504454	0.096689181	0.316247638	0.126680125	0.356871467	0.78990652	0.336021934	0.22524811	0.281739906	0.541083395
E06000025	2012	0.482680981	0.58065818	0.591871864	0.345060094	0.178829805	0.183590107	0.624088183	1.610838468	0.301840181	0.390993722	0.232294026	0.335333404	0.385106708	0.799978158	0.750435083	0.252640746	0.829479555	0.015068801	0.107162088	0.902973904	0.954601113	0.799649309	1.164987521	0.321406272	0.504949526	0.374789591	0.123410664	0.810647127	0.072187617	2.158499159	0.055854348	0.243631782	0.201639028	1.013947515	0.670412382	0.200421011	1.659231609	0.463810066	0.295077871	0.10350507	0.300929703	0.120279232	0.340563948	0.743701091	0.339440372	0.218551881	0.269342771	0.532828003
E06000026	2012	0.451643003	0.559206249	0.566410189	0.339496676	0.165443429	0.172799155	0.589471679	1.750057927	0.294153893	0.375346637	0.229588436	0.323678306	0.362576339	0.820454611	0.724480884	0.243995678	0.795636993	0.014708291	0.104088803	0.870755118	0.914699091	0.769201521	1.134111481	0.31725858	0.480300648	0.363244958	0.10779446	0.78076308	0.069430144	2.113414	0.055731788	0.228277534	0.198941717	0.982038379	0.658812553	0.191637997	1.504879236	0.451278124	0.288607955	0.100105734	0.294737286	0.121189964	0.316479452	0.732021016	0.329501706	0.20556193	0.25594319	0.506268178
E06000027	2012	0.503149575	0.596986215	0.615557362	0.360998147	0.181211223	0.199387611	0.635179458	1.763111883	0.312447157	0.404946916	0.255023141	0.36494764	0.381352791	0.800481692	0.769630308	0.262648402	0.852709198	0.014610894	0.104364379	0.950145393	0.958166985	0.861693505	1.222966678	0.363999714	0.534762973	0.386184231	0.119973995	0.868442613	0.070021867	2.307068567	0.056409305	0.245245233	0.225426333	1.046192528	0.689960596	0.210656656	1.634042552	0.501105647	0.312349772	0.091425735	0.326122651	0.13371493	0.362505332	0.804123145	0.328871743	0.23050169	0.281593743	0.520773558
E06000028	2012	0.442954181	0.561486552	0.565003855	0.329962452	0.167096336	0.171744614	0.59475804	1.679171374	0.282807705	0.366746894	0.221430499	0.324060263	0.371353879	0.791407122	0.721871425	0.236780376	0.785868111	0.015487461	0.105576111	0.860242706	0.904585454	0.757557652	1.115259923	0.306642976	0.480873646	0.355549145	0.107838495	0.748735363	0.07180801	2.045574961	0.053115915	0.228817995	0.1959913	0.953776225	0.631844348	0.192185191	1.539324153	0.438997888	0.287713631	0.091399181	0.284940274	0.117636803	0.319524623	0.722949253	0.324216323	0.207575666	0.259778892	0.505130212
E06000029	2012	0.49378899	0.588476467	0.602139369	0.35381836	0.180371582	0.191293433	0.627984267	1.667684108	0.305308245	0.396721307	0.241811287	0.35232792	0.385833976	0.794625594	0.762803019	0.255678046	0.841181757	0.01542446	0.10683078	0.926693183	0.954592445	0.828897534	1.187616648	0.339994282	0.523111407	0.379583562	0.122565545	0.839207527	0.070061164	2.235180144	0.05575545	0.243819398	0.212903162	1.017524265	0.675171057	0.204913521	1.686554678	0.485548432	0.302485983	0.099116297	0.30870252	0.124607397	0.351419566	0.769862258	0.335939029	0.222802289	0.276383767	0.531366956
E06000030	2012	0.451025392	0.565897712	0.572430286	0.337066844	0.172182275	0.170617156	0.603937027	1.694423981	0.296237378	0.377829005	0.224088113	0.319240169	0.373135138	0.824871794	0.724311315	0.243890159	0.79390738	0.014641366	0.109139614	0.876913918	0.93615315	0.758245295	1.13153272	0.30912822	0.474591245	0.362595888	0.112082266	0.762338493	0.07709916	2.064669106	0.056936405	0.23392385	0.194394291	0.997974595	0.661999802	0.194373326	1.503063439	0.436798742	0.291969772	0.107695932	0.289327385	0.121627125	0.32219663	0.706883576	0.330324722	0.209620827	0.259760994	0.522143987
E06000031	2012	0.434853358	0.545637822	0.555852439	0.330439245	0.16810337	0.166246223	0.592207076	1.6645015	0.291182448	0.368839312	0.219064738	0.300970076	0.360338144	0.815568727	0.700512611	0.239190215	0.768001873	0.013632793	0.10801092	0.854750925	0.921079186	0.735848607	1.103380254	0.302143204	0.460485883	0.348299327	0.106043579	0.731258671	0.076512114	1.985226943	0.056079052	0.228963289	0.188274008	0.971225329	0.644227468	0.192540709	1.370800601	0.412425774	0.288488034	0.113611336	0.28484331	0.120881394	0.318050382	0.668091332	0.319933227	0.206984767	0.253870586	0.505521687
E06000032	2012	0.383208881	0.499476384	0.514600969	0.280939178	0.187285629	0.149464131	0.588617504	1.407707825	0.257771892	0.312457118	0.186434479	0.243562517	0.353458422	0.775044183	0.595779079	0.211104386	0.643275734	0.012058813	0.117422488	0.753413414	0.879613975	0.616465458	0.962346374	0.251431553	0.395291046	0.284268752	0.09844075	0.582746219	0.098341226	1.561988035	0.052508713	0.216257602	0.168441236	0.93192132	0.550940972	0.18608856	1.053212548	0.306580004	0.288827779	0.108558395	0.244731716	0.119913536	0.331757714	0.551873911	0.266335989	0.211477504	0.261860037	0.468790013
E06000033	2012	0.475631485	0.579609265	0.588510001	0.346890797	0.175914521	0.182443676	0.616996057	1.674523262	0.302138624	0.389827428	0.237835037	0.339575615	0.380839039	0.808476827	0.744418562	0.25264016	0.822329901	0.015381097	0.109094544	0.907847631	0.954331024	0.802405564	1.168205253	0.326834627	0.507046516	0.37349419	0.116913333	0.809176849	0.072685116	2.163523826	0.057521247	0.23941587	0.206322534	1.010526025	0.670730353	0.201288301	1.62095263	0.461071125	0.299395114	0.100289371	0.300011151	0.125051784	0.33550885	0.744716041	0.336764486	0.217052541	0.270695757	0.535447722
E06000034	2012	0.443954398	0.560227715	0.556115747	0.342680701	0.164133642	0.166323122	0.583271237	1.67484652	0.295504228	0.373607325	0.228669774	0.310279097	0.358580243	0.827782755	0.706003768	0.243080524	0.78174943	0.014219387	0.109550019	0.864011435	0.939597481	0.746195622	1.12500653	0.308811152	0.471505897	0.362967466	0.10472646	0.763822213	0.071352281	2.051847722	0.061408851	0.229891149	0.190708193	0.997063784	0.658138432	0.191632865	1.45856082	0.430802534	0.285831683	0.118326624	0.281115308	0.122339285	0.310015378	0.694313589	0.331082731	0.201267409	0.25515271	0.52943937
E06000035	2012	0.46657794	0.574089223	0.580118974	0.345263387	0.173447079	0.17641805	0.609264613	1.694261304	0.301998337	0.383058758	0.230135022	0.3289643	0.377158565	0.826363117	0.738870158	0.249851308	0.816097422	0.015504332	0.108846381	0.889935515	0.953143814	0.77857496	1.149858706	0.316945926	0.490302008	0.373174401	0.116015166	0.796123469	0.073410514	2.124487495	0.05848221	0.236090513	0.199783189	1.010045305	0.672408124	0.19621303	1.596658276	0.450674317	0.293861389	0.110843448	0.29580007	0.121825981	0.325883804	0.731548047	0.339763702	0.21109404	0.264974497	0.535060733
E06000036	2012	0.484377937	0.595910765	0.598131276	0.351000453	0.181008769	0.179299306	0.631945504	1.601389442	0.304078575	0.39283931	0.229749765	0.334115463	0.397350277	0.833813445	0.763625629	0.255237962	0.83922359	0.016245558	0.113988506	0.910467013	0.987727166	0.782088072	1.165339187	0.31218666	0.505729788	0.38135172	0.123044106	0.808082293	0.075826445	2.143793015	0.059791786	0.244814449	0.198044864	1.039662273	0.679277402	0.200851514	1.714089688	0.461077335	0.298266734	0.118525186	0.292478256	0.119825089	0.334873516	0.72638542	0.353401451	0.216098158	0.273618111	0.560222126
E06000037	2012	0.508339442	0.608360262	0.616881126	0.353583957	0.186484314	0.190923347	0.65005534	1.58720771	0.307968719	0.402827662	0.235959322	0.359476786	0.406922371	0.807792975	0.77567616	0.260734723	0.869788872	0.017556776	0.115272773	0.932507414	0.986974152	0.821508873	1.191481975	0.330270416	0.523103883	0.398125638	0.131028949	0.852059526	0.072819812	2.226966778	0.058024927	0.251763459	0.206616529	1.040500057	0.684795735	0.205744429	1.85647008	0.483956148	0.304669872	0.10757914	0.307851975	0.120212773	0.356669722	0.78107885	0.350113644	0.225408538	0.28492816	0.564329351
E06000038	2012	0.431180732	0.554667441	0.548729467	0.309556559	0.187700472	0.157772899	0.606493744	1.52857462	0.27452685	0.346654817	0.198564033	0.289319313	0.389563882	0.803815869	0.676454737	0.228565868	0.744975541	0.016912716	0.118132881	0.812078667	0.91453674	0.681141204	1.046142733	0.267432379	0.446273466	0.330779864	0.11025793	0.667311402	0.084878624	1.81638096	0.05386837	0.227744649	0.175863305	0.962671762	0.597767571	0.188430987	1.419469112	0.375560622	0.289955513	0.109961188	0.262471174	0.112405481	0.324829796	0.65864839	0.311137124	0.208169271	0.261791273	0.518573319
E06000039	2012	0.385270865	0.502140622	0.514027547	0.266302383	0.208562157	0.142954401	0.622146995	1.275797078	0.249473506	0.297955987	0.171175964	0.230118907	0.372643696	0.772330514	0.577843465	0.208002988	0.633762185	0.012655356	0.127560559	0.741222764	0.914156781	0.577367217	0.930571735	0.229250372	0.37847346	0.270822467	0.103684842	0.532052552	0.112431623	1.405402145	0.053995565	0.220552034	0.159713107	0.966763025	0.532884236	0.190616413	0.952955605	0.265400896	0.299998593	0.112328729	0.240589125	0.117853005	0.351580301	0.501935563	0.259286785	0.227502608	0.27586798	0.482030737
E06000040	2012	0.514386307	0.598896403	0.615439246	0.344566597	0.210409219	0.189625922	0.675193484	1.446694203	0.302150423	0.390376859	0.224053621	0.351946866	0.431744539	0.799494436	0.763654752	0.262120155	0.842647807	0.020605174	0.121922828	0.90964729	0.992909354	0.793739702	1.15187136	0.309742056	0.51996853	0.375477165	0.140127758	0.810539286	0.082878463	2.100245617	0.05664792	0.250701589	0.201846495	1.041192907	0.646214932	0.208367371	1.847746598	0.44513008	0.31177424	0.106153628	0.293657601	0.119431323	0.381614159	0.77583778	0.331590845	0.234929009	0.296157712	0.575051586
E06000041	2012	0.521701226	0.604539141	0.622583901	0.351821353	0.201399163	0.192171327	0.672272641	1.449804034	0.307045008	0.400902446	0.228586223	0.356862684	0.426371858	0.80867083	0.779747957	0.263104977	0.865002357	0.019296559	0.119918651	0.926804917	1.00296776	0.809088374	1.177428487	0.318652254	0.521080451	0.396020175	0.13763453	0.837399821	0.078766412	2.163383082	0.058401793	0.255025035	0.203467982	1.044686053	0.669639976	0.207766304	1.895363675	0.465214195	0.306788934	0.11158115	0.299513964	0.118786696	0.375322329	0.783965606	0.347912294	0.229992428	0.293264551	0.583989769
E06000042	2012	0.44617091	0.570854972	0.566267645	0.327186872	0.180224259	0.166803715	0.610786519	1.583733027	0.289167333	0.366969938	0.216625495	0.304957581	0.380968689	0.816096108	0.700440752	0.242509914	0.779896823	0.015459155	0.115110899	0.853732081	0.948180861	0.725805237	1.100631806	0.293769395	0.466727458	0.353641045	0.113584992	0.733694068	0.080961463	1.958958698	0.057506518	0.234613173	0.186003072	1.004457065	0.640063661	0.193903389	1.490636521	0.40901634	0.293474835	0.115242812	0.277546649	0.119244506	0.326819361	0.675559345	0.325166548	0.211533583	0.264354182	0.529951061
E06000043	2012	0.443899231	0.585463011	0.576765599	0.326416787	0.172536471	0.168772078	0.606210061	1.756643244	0.286604331	0.368271011	0.218134366	0.326707631	0.392128952	0.830459383	0.731527717	0.240687969	0.800952583	0.016913289	0.114095609	0.86848225	0.931917371	0.748158044	1.12662655	0.298915969	0.483625702	0.365644356	0.110949109	0.747308852	0.077248408	2.044894988	0.054823689	0.234030998	0.194831795	0.987026751	0.652241327	0.191833046	1.62716221	0.437756858	0.293814239	0.087912932	0.283124582	0.11850794	0.317193612	0.733825044	0.344297927	0.209922201	0.266582854	0.531326142
E06000044	2012	0.434148924	0.550560528	0.548224214	0.33301823	0.16132833	0.163660625	0.577247597	1.740166491	0.287922856	0.367623325	0.219350658	0.307137243	0.360560061	0.824233547	0.714416453	0.236367485	0.781742387	0.014016109	0.102830038	0.847189262	0.913237747	0.740134581	1.10868416	0.299376682	0.466703459	0.357120738	0.102397175	0.739756756	0.069209793	2.031902668	0.056074194	0.224243578	0.187333252	0.96379737	0.646146263	0.187849887	1.434977985	0.432131931	0.280580457	0.101516954	0.281787176	0.117257178	0.297790521	0.701757036	0.335110106	0.198938005	0.247665745	0.508649136
E06000045	2012	0.420840849	0.539895278	0.541176093	0.321930091	0.16349831	0.158715249	0.575572802	1.738458648	0.28196987	0.357738096	0.213707588	0.295633574	0.358709753	0.826892185	0.692034056	0.23001469	0.755537248	0.01411026	0.10619262	0.827445769	0.894387385	0.716612499	1.080896861	0.28923644	0.452518582	0.341814304	0.100151134	0.707088829	0.073525969	1.95651194	0.054607915	0.220992751	0.185904085	0.945016214	0.626744634	0.185644159	1.363503935	0.409619454	0.282766658	0.099087267	0.275086185	0.116640615	0.29939706	0.674524448	0.32291559	0.198707704	0.246815102	0.497432989
E06000046	2012	0.530844446	0.616853155	0.640312058	0.371838438	0.191438779	0.209476567	0.66510788	1.786233048	0.325825467	0.419354907	0.267540842	0.382611088	0.399683714	0.823461964	0.797030199	0.273121884	0.887042686	0.015438977	0.108671354	0.990468944	1.00025403	0.899618137	1.269689772	0.380673161	0.561800435	0.403298425	0.128975648	0.925249576	0.072008428	2.4036051	0.060066594	0.255422345	0.236124444	1.087841607	0.719360546	0.218605441	1.731450415	0.524759062	0.325165502	0.089613581	0.341066758	0.138326554	0.380446074	0.839850544	0.342470705	0.239447461	0.294630772	0.55221434
E06000047	2012	0.482915728	0.580190894	0.594824923	0.353856852	0.170778751	0.185115195	0.611738272	1.798219594	0.308853133	0.395527918	0.246500756	0.349471968	0.373107639	0.828046247	0.754538558	0.256318366	0.839786301	0.015001027	0.104007087	0.917138223	0.944984479	0.822448138	1.193370128	0.34268788	0.512701729	0.382788679	0.117433551	0.847325432	0.067930832	2.258676652	0.05830646	0.23773496	0.212310797	1.019517383	0.690015157	0.200124951	1.612976328	0.486176935	0.299501272	0.096875287	0.315350913	0.126681402	0.333053787	0.783463607	0.338664284	0.213924964	0.26346376	0.525677667
E06000049	2012	0.497103245	0.59235628	0.606030905	0.349573863	0.181563695	0.19205936	0.633522167	1.63943186	0.304303009	0.396141796	0.241114374	0.355363621	0.387833083	0.790600651	0.759235533	0.256911324	0.845997783	0.015369266	0.10720651	0.924242804	0.959659777	0.826834219	1.187355206	0.339531015	0.519994482	0.385311557	0.124817779	0.844715232	0.071651271	2.224740212	0.05642922	0.245493823	0.212756786	1.027597606	0.678117531	0.204374639	1.732751583	0.483500604	0.302731611	0.096279929	0.310970661	0.124740679	0.353904616	0.775847796	0.335080879	0.223933386	0.278852756	0.535348765
E06000050	2012	0.486774077	0.582253272	0.596219997	0.345128509	0.175886549	0.186115777	0.621789961	1.661992815	0.303456794	0.393467581	0.240249177	0.348379862	0.380578816	0.796985627	0.754861144	0.255625774	0.835971375	0.015662002	0.105236078	0.914113971	0.941863691	0.813738528	1.177649673	0.33416498	0.512041283	0.379923665	0.121949136	0.832223733	0.06908863	2.217128661	0.056671582	0.240864895	0.207987762	1.008670262	0.673454163	0.20123934	1.673055033	0.477464166	0.297758398	0.091777382	0.306360936	0.122351613	0.342516404	0.772191181	0.333754492	0.218426714	0.267583516	0.527996312
E06000051	2012	0.51323777	0.604745198	0.621989384	0.362015733	0.184476311	0.198741746	0.645162091	1.736309686	0.316098284	0.410232776	0.254354293	0.367891651	0.392988805	0.809822441	0.778890543	0.264621451	0.869551939	0.015191634	0.106527027	0.954949001	0.974831548	0.860801484	1.232404931	0.357946929	0.537075632	0.395626013	0.126716975	0.880762306	0.070101124	2.32521831	0.057843411	0.251138485	0.22278453	1.046282459	0.700672142	0.210759181	1.747411939	0.507378934	0.310732855	0.095336027	0.32373203	0.129849644	0.360574844	0.802751902	0.342374216	0.229938431	0.283045509	0.543272024
E06000052	2012	0.506635412	0.602507765	0.617619099	0.356291342	0.180159197	0.200698741	0.636339864	1.738687001	0.311337555	0.405619782	0.254736049	0.366773755	0.384549621	0.793221184	0.771176913	0.262400448	0.86502619	0.014738179	0.104444859	0.950962634	0.961533188	0.862480009	1.226334135	0.363889218	0.534304183	0.395338603	0.120612526	0.882316523	0.068636845	2.309992307	0.057008598	0.247154997	0.22555503	1.046263087	0.696758406	0.209560982	1.705931437	0.504412618	0.311768917	0.089367727	0.326331824	0.13146669	0.35797047	0.788385578	0.334022549	0.228657378	0.284577522	0.528579406
E06000053	2012	0.503475732	0.581375466	0.610539227	0.361178412	0.20369289	0.188394692	0.656931597	1.685149365	0.307256094	0.395582826	0.25438735	0.424834272	0.434735914	0.806802384	0.774515357	0.279952918	0.89111765	0.017197332	0.124886426	1.015705434	0.968462658	0.850007924	1.207928359	0.354479572	0.553327331	0.387595726	0.132431946	0.834264401	0.080047721	2.320146177	0.051226738	0.257579719	0.244267329	1.128373618	0.699572655	0.225214757	1.945141706	0.494798907	0.310459523	0.106347457	0.325213289	0.129985133	0.355414088	0.897259405	0.350192176	0.268089658	0.32334787	0.534686184
E06000054	2012	0.492772689	0.590392412	0.600677679	0.353055468	0.177470798	0.189634425	0.625616796	1.660124454	0.308064454	0.400501248	0.243645739	0.349888777	0.381573201	0.797072333	0.757047539	0.25767799	0.84481278	0.015040225	0.105429872	0.927150441	0.958883413	0.826417744	1.194233038	0.340319794	0.516508633	0.386886514	0.121415201	0.843906842	0.069557914	2.236605425	0.057618545	0.245572593	0.211196891	1.024051455	0.684922833	0.204371179	1.681285564	0.482455107	0.300612656	0.101473545	0.308953306	0.12550421	0.344660545	0.761552193	0.336398236	0.22105523	0.272569772	0.535655545
E06000055	2012	0.470069113	0.573875553	0.583165506	0.34088606	0.18184205	0.179491223	0.620959868	1.575065525	0.296270441	0.38147263	0.227216673	0.323903884	0.383710523	0.795033912	0.731439236	0.247963556	0.806645425	0.015073522	0.109911235	0.886089818	0.956502821	0.772664266	1.13854738	0.311381009	0.492388854	0.362724299	0.1214686	0.773483821	0.076796359	2.07449802	0.057034969	0.239990987	0.196339549	1.010896934	0.652297555	0.199837338	1.576681982	0.44097047	0.296403273	0.103922126	0.292978824	0.121629183	0.33893181	0.712985269	0.329418522	0.219925747	0.269506773	0.529581196
E06000056	2012	0.491862282	0.59797683	0.606168672	0.353748882	0.181116148	0.187953998	0.634646825	1.658979214	0.30958004	0.398798189	0.238793137	0.349610556	0.39230261	0.821837844	0.763691015	0.258561481	0.852425972	0.016101749	0.112486111	0.927040567	0.982002496	0.817224819	1.190226486	0.332465504	0.516149608	0.38981833	0.12545686	0.840209602	0.073893349	2.217095061	0.058988372	0.24706311	0.20784043	1.041135288	0.688023694	0.20341443	1.747951965	0.47733019	0.303062553	0.107760288	0.307822342	0.124099585	0.348140329	0.769164485	0.3458894	0.220581072	0.278122965	0.552713386
E06000057	2012	0.506038812	0.600767538	0.615134824	0.356382892	0.18013442	0.195896547	0.635429498	1.738460475	0.310233135	0.403077946	0.252285869	0.364993485	0.386111614	0.801155882	0.768124548	0.262242721	0.862547978	0.015319799	0.104121091	0.939903238	0.961037625	0.849748887	1.216410081	0.354841328	0.53155146	0.393195489	0.124352994	0.87771556	0.068713536	2.308861781	0.057476813	0.248155039	0.221119934	1.039655426	0.696882359	0.206662731	1.722516798	0.501734819	0.306344943	0.093914371	0.322408478	0.128254605	0.3538894	0.799254259	0.337118562	0.225920602	0.276853284	0.531604194
E07000004	2012	0.491956735	0.600812592	0.606611053	0.348668494	0.185284807	0.186981446	0.640355518	1.619772086	0.308036445	0.398108866	0.23712531	0.346466813	0.397396995	0.82184908	0.758536145	0.257232836	0.844365897	0.016385732	0.114338828	0.921587165	0.983537262	0.808071918	1.184421044	0.328439247	0.508823137	0.389342171	0.12446802	0.826548631	0.076211359	2.180127456	0.059665094	0.249508411	0.206646499	1.040425302	0.679548323	0.20528073	1.714305435	0.465527799	0.304778704	0.109790892	0.304347331	0.124792232	0.3514853	0.748771132	0.342658089	0.22259821	0.280648832	0.558650304
E07000005	2012	0.525751308	0.600362255	0.625663506	0.34653969	0.203717837	0.203821576	0.673979914	1.436487722	0.309578626	0.404661794	0.238268724	0.366651194	0.415759554	0.777013444	0.770835946	0.262599466	0.859642365	0.017269156	0.117802831	0.938634177	1.00110309	0.837736591	1.188258505	0.330952141	0.531930586	0.394032726	0.140089031	0.851325669	0.077744961	2.197606355	0.058091475	0.255589159	0.215462844	1.041391377	0.665391368	0.211513253	1.857473463	0.477330026	0.312723474	0.096279333	0.312254036	0.124461498	0.390701732	0.775102635	0.332738304	0.236348202	0.299586709	0.568668288
E07000006	2012	0.525127753	0.6077976	0.625230104	0.346845253	0.207115065	0.201562894	0.676073582	1.443879825	0.300682021	0.394592961	0.234100247	0.361949502	0.423781254	0.769250231	0.775654909	0.258571755	0.854308814	0.017465635	0.118439764	0.923629755	1.003904098	0.823646039	1.175895526	0.324988036	0.537357935	0.381531847	0.143242828	0.839432318	0.079729173	2.177283114	0.056383772	0.256512464	0.210155104	1.049708312	0.656933312	0.211627132	1.876142948	0.473545602	0.311178457	0.098203864	0.305639256	0.121837077	0.393360447	0.774426263	0.331808151	0.239181594	0.300609784	0.567043647
E07000007	2012	0.483535623	0.580613323	0.592893441	0.330073773	0.200974781	0.183294285	0.647204098	1.468278861	0.29301662	0.37575875	0.220499597	0.332148533	0.404620757	0.792796379	0.725060667	0.250039367	0.80055354	0.017171493	0.11742671	0.876692505	0.967281941	0.762195661	1.119276478	0.302300485	0.489732195	0.358209766	0.126216349	0.764591523	0.084445248	2.006689205	0.056574049	0.243668082	0.197789837	1.015274455	0.632708529	0.203050394	1.644373594	0.423623415	0.303834793	0.104700723	0.285693551	0.120163832	0.363845204	0.718257282	0.317681404	0.227060907	0.287901067	0.546173278
E07000008	2012	0.448758405	0.567787462	0.565551013	0.320969553	0.196383501	0.162887539	0.619721608	1.563850695	0.279035294	0.353932311	0.202262591	0.309818497	0.409072577	0.821464933	0.704433351	0.234244129	0.773818901	0.019247826	0.118656949	0.828799581	0.92403262	0.703200357	1.071866136	0.27106704	0.465468293	0.336915978	0.119687655	0.697211506	0.084189063	1.895657945	0.052739311	0.231433606	0.181316336	0.97688647	0.604889197	0.190220111	1.552380416	0.396727219	0.295361224	0.101876296	0.270530585	0.112228095	0.335476839	0.724201174	0.319687992	0.211485741	0.26539835	0.53521883
E07000009	2012	0.506764765	0.600232246	0.608822142	0.359682007	0.181190576	0.189132778	0.636673602	1.649403131	0.31045881	0.407389159	0.240807853	0.350406253	0.396050136	0.800781688	0.780238068	0.260078458	0.870291887	0.016092823	0.107730463	0.93276834	0.981207247	0.832478165	1.201452053	0.335428622	0.526072117	0.394783579	0.127024811	0.847219781	0.069002991	2.264916167	0.05821676	0.248841608	0.208901328	1.031263999	0.692686608	0.205632097	1.773966639	0.488466613	0.299491388	0.113060547	0.308086739	0.121025615	0.342408836	0.774518628	0.352308218	0.221822642	0.275441982	0.553096282
E07000010	2012	0.502496795	0.597569664	0.613980803	0.370534161	0.175245318	0.196139752	0.627802429	1.860212424	0.321809871	0.406478647	0.257965984	0.364780995	0.378177586	0.846869851	0.779199161	0.264215503	0.86695532	0.014658612	0.10810648	0.951419968	0.977780761	0.862884869	1.238343576	0.363187778	0.532020191	0.398700368	0.119377488	0.883700239	0.069734782	2.341807783	0.060729049	0.244512172	0.225629632	1.04213455	0.713472671	0.20757841	1.644859432	0.505962536	0.312051962	0.107966721	0.330044507	0.134633151	0.348924819	0.794837409	0.344619192	0.220748145	0.281536161	0.541106653
E07000011	2012	0.498567656	0.595353799	0.60631417	0.348346213	0.184213796	0.187440826	0.639695532	1.601533623	0.304560413	0.396271369	0.235754596	0.345334908	0.396571924	0.797338281	0.765620274	0.256302691	0.854395578	0.015941117	0.10933737	0.915322832	0.973898028	0.810768781	1.182033643	0.326852419	0.516733162	0.385359383	0.129134612	0.832686109	0.072937812	2.198019232	0.05728057	0.248186278	0.20480659	1.031489135	0.678406602	0.203498369	1.7593501	0.47759196	0.299328614	0.101260836	0.302663581	0.119915517	0.348019661	0.759263253	0.346524853	0.223923908	0.277362875	0.548036777
E07000012	2012	0.507978013	0.598187819	0.61080637	0.346933164	0.191318908	0.190035717	0.650407559	1.495697681	0.305015136	0.400357418	0.233198525	0.348975066	0.40585081	0.792317485	0.76554791	0.258430318	0.854780974	0.017408798	0.113966008	0.918454609	0.980732952	0.815035238	1.176419775	0.32200143	0.520969281	0.387070687	0.133013284	0.829400347	0.074271083	2.183288	0.057296535	0.251347088	0.203570509	1.024095211	0.666764112	0.206231677	1.806942121	0.46858238	0.302307805	0.103767419	0.300848987	0.118782146	0.361806691	0.763255824	0.33969639	0.226988904	0.28209686	0.558891582
E07000026	2012	0.500152047	0.597974976	0.613802934	0.35688573	0.176512788	0.196151721	0.631046981	1.758323945	0.312532479	0.40546897	0.253762911	0.367196618	0.381577145	0.806285881	0.771430472	0.26307856	0.860089346	0.015095326	0.105257864	0.948204487	0.958826098	0.855060135	1.224241444	0.358767876	0.530680627	0.393193864	0.124498648	0.878238423	0.069188577	2.311037307	0.057483259	0.247353707	0.222161791	1.033566462	0.69688118	0.207547634	1.700156749	0.503766948	0.306692804	0.090909477	0.32545616	0.130390631	0.353660827	0.800114076	0.333745922	0.224561284	0.273405526	0.533165806
E07000027	2012	0.480218186	0.576284568	0.589071476	0.355435478	0.169450559	0.184069658	0.607271527	1.810472818	0.307969657	0.393003932	0.246053732	0.352755175	0.368855501	0.824903147	0.747396401	0.253261595	0.831214148	0.014494952	0.103196151	0.914844713	0.940555128	0.818699572	1.190551918	0.345432266	0.507051141	0.383752961	0.115701241	0.845462894	0.067834432	2.245012458	0.058707244	0.236334563	0.213604964	1.01170881	0.686767401	0.20056691	1.575705777	0.484747736	0.297602371	0.100512399	0.314945091	0.12862611	0.330127137	0.786813279	0.333864305	0.212581113	0.261787836	0.526073695
E07000028	2012	0.484514541	0.593648452	0.59638731	0.349172514	0.172028465	0.186740054	0.610484744	1.76183911	0.299434117	0.393258634	0.239605289	0.351997049	0.37650284	0.793050471	0.756746435	0.251745132	0.842001157	0.014768234	0.102419578	0.914319038	0.938619431	0.820541454	1.181703896	0.341100613	0.511788659	0.387088786	0.11562288	0.833904847	0.066714772	2.239839945	0.054849531	0.240069539	0.213407574	1.010181202	0.682641712	0.200301316	1.670810773	0.488180469	0.29905525	0.098378529	0.30876939	0.124951135	0.332692681	0.761975623	0.337264384	0.216883849	0.268561048	0.517046995
E07000029	2012	0.499820128	0.595134352	0.610765286	0.353659056	0.178821757	0.192252595	0.63275183	1.703721576	0.306451959	0.398842283	0.245747281	0.369618928	0.388621984	0.801613617	0.768649777	0.261141425	0.859481545	0.01722138	0.107964074	0.930752594	0.957392995	0.836663618	1.194885575	0.343762551	0.528192744	0.390759614	0.131560142	0.867318138	0.069264573	2.278576068	0.057518662	0.244010237	0.213358818	1.028225044	0.683700621	0.202336939	1.812443697	0.495600806	0.302389024	0.094031076	0.318923771	0.124433297	0.352502645	0.825573249	0.335847232	0.221294281	0.272567793	0.541727134
E07000030	2012	0.513716809	0.607749214	0.628997231	0.344862734	0.189381626	0.203799384	0.655553743	1.629725217	0.302444493	0.399665532	0.246137527	0.371628593	0.397800952	0.76809735	0.772032461	0.25895566	0.860413922	0.014726166	0.10542584	0.946645211	0.960646042	0.854034426	1.211785849	0.356116759	0.531879302	0.390864538	0.127450649	0.86041117	0.074163032	2.266609388	0.054557686	0.253066421	0.222633167	1.045233451	0.679009811	0.212038652	1.799524104	0.502914182	0.316273826	0.083102852	0.321488682	0.128542249	0.377057984	0.773963596	0.327262148	0.238403381	0.29365004	0.531403172
E07000031	2012	0.535660093	0.618330588	0.640613844	0.365844111	0.192696071	0.208893355	0.665833309	1.682151185	0.313374328	0.415649284	0.258279328	0.387074981	0.404433764	0.785009801	0.796842056	0.267411898	0.889803405	0.015843243	0.105772171	0.975661931	0.979121063	0.889596581	1.246369858	0.371303025	0.55734602	0.403057522	0.1322507	0.911131993	0.069961405	2.380446765	0.055756126	0.255502754	0.232077386	1.066416098	0.700024378	0.21664125	1.852209944	0.527341421	0.317609844	0.089054168	0.331493557	0.131250316	0.380798295	0.842991445	0.338025425	0.240287978	0.295198173	0.543609858
E07000032	2012	0.501481534	0.593729429	0.611235412	0.3536844	0.179821527	0.189875611	0.633489034	1.720802385	0.307673457	0.400924353	0.245614466	0.352235164	0.38875681	0.803650082	0.768273694	0.258942625	0.858550524	0.015465377	0.104554698	0.930012801	0.959923051	0.835370036	1.204591396	0.344470484	0.523937678	0.387222134	0.125395409	0.859826572	0.069333001	2.279135664	0.057089623	0.246355837	0.212272971	1.043395563	0.691438452	0.206118369	1.713962974	0.490018303	0.302401523	0.095514963	0.313144227	0.124761798	0.345736655	0.792299464	0.343618105	0.224113073	0.273816944	0.536154717
E07000033	2012	0.482709036	0.584292368	0.595402882	0.348719851	0.172423249	0.18413665	0.615469616	1.74260599	0.306714575	0.39778239	0.242338962	0.346621614	0.375286193	0.815079718	0.757802222	0.255600098	0.840299618	0.014496705	0.103449782	0.919881287	0.93858848	0.824108908	1.190581086	0.341154909	0.513037238	0.38478034	0.118076555	0.839340791	0.067427402	2.251220268	0.05709735	0.239255522	0.208924531	1.014406872	0.687707807	0.201629141	1.615145182	0.484567184	0.297889657	0.089459776	0.311552721	0.124147741	0.332156011	0.769378628	0.339565237	0.216490427	0.263669657	0.525960375
E07000034	2012	0.486976637	0.59464958	0.601441917	0.353937478	0.172718502	0.188164618	0.616652622	1.778602922	0.306163236	0.399900488	0.246677021	0.354080517	0.377614551	0.813919799	0.766718452	0.258119193	0.852490794	0.014535851	0.102165111	0.928829391	0.949904594	0.834723393	1.203041807	0.34585123	0.520528341	0.390148704	0.116967813	0.849649704	0.066958976	2.27477975	0.057512973	0.242278532	0.213356142	1.022492781	0.694827691	0.203015095	1.655257901	0.493049607	0.300388695	0.093882034	0.317050565	0.127410965	0.332353009	0.781848685	0.34405276	0.216894478	0.266283358	0.527598862
E07000035	2012	0.52731888	0.61252296	0.634112117	0.347606426	0.195764705	0.210972846	0.666492758	1.621656802	0.30856527	0.398612383	0.254689969	0.382924837	0.403533295	0.765701523	0.774093247	0.262995048	0.871886986	0.015379136	0.108488292	0.957024131	0.983523994	0.875504127	1.220557698	0.365231161	0.547126657	0.401484981	0.130957114	0.893758728	0.076863921	2.286998497	0.055181726	0.254448779	0.23416036	1.069002853	0.68731258	0.214698299	1.864498828	0.509006173	0.320073497	0.07978815	0.325285791	0.132235891	0.387633595	0.809680782	0.331131803	0.241935107	0.309387599	0.55043647
E07000036	2012	0.491873801	0.591816103	0.601420908	0.343486613	0.179575548	0.185833816	0.62914969	1.617484032	0.296167505	0.389520392	0.233030881	0.34926921	0.390663651	0.787347269	0.770056249	0.255601099	0.845716446	0.015946598	0.106476016	0.90908617	0.951258643	0.808756316	1.165366873	0.326437941	0.516157739	0.38207262	0.126241371	0.825196665	0.069703971	2.19975548	0.054992463	0.244370249	0.203610013	1.010454112	0.670417644	0.201442038	1.762473329	0.480473368	0.294469918	0.098144815	0.303065663	0.11871887	0.342885654	0.770014003	0.339769043	0.221655771	0.270941249	0.532004071
E07000037	2012	0.497069535	0.598813943	0.606557237	0.355593582	0.177163049	0.189900178	0.624998636	1.745934065	0.312688746	0.400626111	0.247687582	0.356927804	0.383769347	0.821858258	0.769901768	0.261645063	0.858039284	0.015196358	0.105893482	0.934510964	0.966301341	0.831248424	1.208883517	0.345310744	0.520144195	0.393489049	0.121152155	0.859011963	0.070099533	2.274875416	0.059039828	0.242786879	0.215940258	1.039079228	0.701068333	0.20307641	1.720712725	0.495391016	0.30270727	0.096345565	0.312811939	0.127486592	0.33905042	0.783559196	0.348849277	0.218740405	0.274941617	0.541997507
E07000038	2012	0.511573464	0.602037549	0.621072636	0.360946135	0.183877674	0.199020328	0.642670171	1.737385303	0.314908283	0.409533235	0.257019654	0.365877826	0.390456965	0.812504297	0.772064757	0.264663589	0.866733423	0.0154896	0.107096331	0.947705368	0.973997888	0.862464004	1.229204184	0.356929507	0.539567471	0.393558977	0.129372996	0.885828729	0.069810121	2.327358336	0.058359511	0.250592431	0.222559577	1.054727528	0.697255669	0.209960621	1.733603977	0.505859541	0.311113202	0.090208929	0.324814941	0.130370428	0.361158779	0.817161573	0.338902861	0.229572498	0.279171483	0.541006485
E07000039	2012	0.479795391	0.590202886	0.594071527	0.343439266	0.174711887	0.183653523	0.619861156	1.66863166	0.303106785	0.390617517	0.235092244	0.340585779	0.382013518	0.805316998	0.75041681	0.252942838	0.836721756	0.014615289	0.107352261	0.909051363	0.960238355	0.802553333	1.173097021	0.329933719	0.504094852	0.384992541	0.119094155	0.822480974	0.071596572	2.17151923	0.057531258	0.243182861	0.204661006	1.022869928	0.682325488	0.199409779	1.67818008	0.471357573	0.296549607	0.100931045	0.30369157	0.122337721	0.337444459	0.742868887	0.340886139	0.216003042	0.271005839	0.534654506
E07000040	2012	0.545695243	0.609559506	0.642306583	0.368152068	0.197590191	0.217413322	0.668957525	1.614593732	0.318272227	0.418991533	0.264482678	0.38666931	0.401425464	0.764626335	0.791991141	0.269966493	0.886915948	0.015387976	0.104801478	0.985543554	0.981953989	0.909388319	1.25440598	0.375645588	0.566554817	0.396233858	0.132470621	0.912704804	0.069650249	2.389845974	0.055547616	0.258337118	0.238626043	1.053267422	0.693141895	0.220337829	1.819311928	0.526333674	0.321834733	0.083410801	0.333458296	0.134311269	0.389715408	0.822540496	0.329551512	0.245674575	0.30179994	0.540794513
E07000041	2012	0.440284854	0.551583457	0.555209184	0.326697179	0.165793473	0.168010375	0.588530597	1.65295708	0.283993324	0.368841875	0.220866204	0.308836012	0.363290757	0.802699037	0.718990972	0.237600627	0.777800556	0.014213756	0.101626199	0.854278825	0.896011203	0.748814577	1.110783754	0.301751261	0.477481187	0.348516694	0.105510203	0.745722669	0.068362895	2.043384875	0.054019995	0.226909954	0.190799322	0.955872871	0.632807258	0.191031026	1.450622837	0.437605164	0.284131709	0.088827825	0.281010371	0.115820393	0.313976911	0.695006767	0.327676299	0.204666493	0.248997586	0.498782938
E07000042	2012	0.504418962	0.598938808	0.612832314	0.355878817	0.178185911	0.198173976	0.631732725	1.681115517	0.308569084	0.405243013	0.247384956	0.363703323	0.382578558	0.7804248	0.768272076	0.259491288	0.86423363	0.014123305	0.102279219	0.940612633	0.956379028	0.848776966	1.212682844	0.354776814	0.527068644	0.395252399	0.120514857	0.865063408	0.06700534	2.288902319	0.05603777	0.245887201	0.220122193	1.032490494	0.690513986	0.206609416	1.723541044	0.50099332	0.305659262	0.094256417	0.317579647	0.126645328	0.351090485	0.770611233	0.337092811	0.224762183	0.280405461	0.525380308
E07000043	2012	0.510756931	0.60275909	0.616713743	0.36123364	0.181547104	0.200078227	0.638242456	1.702668999	0.311738338	0.409594491	0.253458583	0.365934783	0.386878852	0.786516512	0.779841126	0.265129019	0.869004969	0.014630669	0.10231614	0.952406347	0.963960035	0.862868007	1.226682459	0.361118515	0.537652717	0.395577452	0.123230514	0.881395104	0.066815393	2.329130068	0.056065745	0.250528356	0.22339748	1.039684697	0.695571774	0.210272642	1.711648007	0.509676198	0.307926846	0.094108175	0.32357313	0.128246684	0.359226108	0.791366458	0.333958815	0.230259969	0.278086908	0.527275335
E07000044	2012	0.543775074	0.623768684	0.647461457	0.361359483	0.197231063	0.215413696	0.673435103	1.640554902	0.312191617	0.415753397	0.258878736	0.39108786	0.40817601	0.763992891	0.797342163	0.268279584	0.894102661	0.015271729	0.105450687	0.980096858	0.992828943	0.893926499	1.247319755	0.373930151	0.558072683	0.405581244	0.133851786	0.905802741	0.073046043	2.361690471	0.056329549	0.258352352	0.235627606	1.075739031	0.697880225	0.218513589	1.873538512	0.52554708	0.323470694	0.080545453	0.334385496	0.133679544	0.387819916	0.814063329	0.335545436	0.246342249	0.305508262	0.546511761
E07000045	2012	0.528769295	0.613546596	0.63356456	0.360127747	0.189874353	0.207194022	0.656701305	1.667090175	0.312244202	0.414177918	0.255581807	0.378717313	0.398719841	0.774223975	0.790261526	0.266067296	0.884669048	0.015250123	0.103771574	0.971364361	0.979201655	0.880932047	1.238762703	0.366868459	0.549904943	0.401884445	0.129045474	0.891734159	0.06950912	2.355154518	0.055761292	0.253799319	0.228735812	1.059522899	0.697376234	0.214963787	1.794630413	0.516668919	0.315384504	0.083964093	0.327163769	0.130485982	0.372784402	0.80852063	0.337990948	0.238484172	0.290668435	0.539753126
E07000046	2012	0.51749892	0.613034559	0.62910471	0.359374339	0.184342464	0.206094201	0.647997025	1.76618501	0.31577984	0.414975898	0.261369893	0.377872334	0.388294821	0.789568329	0.777385461	0.267700459	0.876184377	0.014576882	0.102973701	0.969268555	0.965983445	0.88150774	1.250751773	0.375190201	0.541787554	0.400965477	0.122267665	0.899566753	0.069250518	2.360754252	0.056109861	0.252449785	0.233678806	1.055022295	0.705412543	0.215425725	1.714794513	0.515791237	0.318596812	0.084754096	0.333421508	0.134996341	0.373797078	0.804525228	0.328622181	0.237046167	0.287077327	0.528320493
E07000047	2012	0.532056987	0.614880782	0.640453824	0.362595861	0.193515419	0.208618223	0.666822743	1.642854445	0.313369768	0.412568856	0.257969799	0.380009682	0.401461509	0.776843264	0.785659346	0.265171189	0.879849257	0.01531077	0.106309759	0.969329179	0.978489594	0.877231258	1.240138019	0.370550551	0.547643706	0.402351916	0.13035602	0.900759826	0.071558669	2.344867002	0.056303959	0.254714678	0.231723357	1.07142774	0.696780626	0.216450675	1.81744648	0.514453576	0.319520853	0.086670939	0.330569581	0.131448716	0.382823335	0.825491001	0.333568362	0.242009026	0.299816786	0.54082095
E07000048	2012	0.536225818	0.593043487	0.630132003	0.370512874	0.195319258	0.214661021	0.659909491	1.641950123	0.324187666	0.416738543	0.264701455	0.377422144	0.392827022	0.78379632	0.782658891	0.268591061	0.863935406	0.015390423	0.105732109	0.979602886	0.979016028	0.9068456	1.245757493	0.375040512	0.560849992	0.385285628	0.130498681	0.905236904	0.070174371	2.373686696	0.056370237	0.251841904	0.237688529	1.045655316	0.685417503	0.218508962	1.714115355	0.516127273	0.32175208	0.089897358	0.333164487	0.137145972	0.392723775	0.830659866	0.321447053	0.240933804	0.299627959	0.537044634
E07000049	2012	0.547003331	0.610346582	0.643026579	0.368690127	0.198255491	0.218743408	0.674121323	1.608543958	0.321583541	0.420398524	0.264899311	0.386755635	0.402838042	0.771396049	0.792499459	0.271865552	0.886242987	0.015526314	0.107355989	0.989655711	0.984478881	0.909704202	1.258418247	0.378323816	0.566674919	0.397552924	0.135304719	0.920408456	0.070839289	2.400584305	0.056220665	0.258854645	0.238122718	1.05967198	0.697479406	0.220256618	1.822489367	0.529092386	0.322068392	0.084846807	0.334679918	0.134162053	0.397601225	0.83013192	0.328825335	0.246409491	0.302716136	0.543492147
E07000050	2012	0.518360171	0.602115741	0.620611799	0.360169989	0.185020228	0.201852081	0.643192621	1.669497001	0.311393349	0.410473597	0.252914671	0.370352586	0.390239474	0.77413173	0.775870298	0.261008485	0.870582714	0.015028323	0.10293175	0.953530665	0.964300919	0.86619228	1.226553138	0.360095895	0.539970089	0.395187447	0.126618841	0.879093049	0.068117099	2.324891804	0.055406533	0.249949236	0.223937868	1.033729774	0.691574625	0.21154868	1.750445473	0.509157947	0.309614917	0.092297588	0.319181072	0.127918183	0.360745485	0.789234654	0.337036628	0.231645159	0.285564178	0.535802412
E07000051	2012	0.524252943	0.606244169	0.629365585	0.364501077	0.188646993	0.209757858	0.651197879	1.729666535	0.314724474	0.411745563	0.259640376	0.378187784	0.391912659	0.783778062	0.77433658	0.263126564	0.874060544	0.014901884	0.105599519	0.968198784	0.97341339	0.885111763	1.239317496	0.372901821	0.546283862	0.397158202	0.125189077	0.899551529	0.070479064	2.355224845	0.056383351	0.251210882	0.23457188	1.056615211	0.697396488	0.213864216	1.758385427	0.515298252	0.318986969	0.089342279	0.331029966	0.135084652	0.375636226	0.808002217	0.331469896	0.235979073	0.299002616	0.535116359
E07000052	2012	0.54555819	0.616032205	0.645247076	0.37025411	0.198743429	0.21751835	0.674445127	1.639260975	0.318011796	0.416824705	0.261936847	0.392644096	0.407050711	0.776277578	0.795176413	0.270292122	0.885537816	0.016013537	0.108879318	0.987201649	0.989082984	0.902043748	1.250553016	0.376105403	0.565734571	0.396559346	0.13555213	0.915883806	0.073294123	2.384534319	0.055131496	0.257353716	0.237733087	1.071541425	0.693468152	0.219999125	1.854052588	0.528251569	0.324418091	0.088024769	0.336396993	0.134315254	0.400298913	0.833296139	0.329162787	0.246803469	0.306004349	0.54397224
E07000053	2012	0.488534854	0.584330793	0.605992471	0.347863683	0.18221407	0.193766831	0.636727471	1.678528022	0.302462338	0.392970119	0.242434809	0.345556889	0.385416801	0.795990094	0.761236952	0.256968081	0.828751872	0.014590829	0.104919485	0.921605564	0.953116107	0.826827822	1.188381719	0.343631598	0.522171961	0.36736607	0.121999254	0.845492895	0.072899345	2.213627402	0.054660819	0.246637672	0.217058003	1.029682593	0.669382635	0.208336221	1.652645219	0.484775405	0.306432457	0.095788322	0.312710234	0.127808187	0.359505273	0.768148669	0.328160422	0.230104047	0.27837533	0.511393661
E07000061	2012	0.504446447	0.601221964	0.614775343	0.364435472	0.182752933	0.19714912	0.638332543	1.746364671	0.312460105	0.407463083	0.252397959	0.364961273	0.389191914	0.811415806	0.780581808	0.263588077	0.858953878	0.016050955	0.107391998	0.957984926	0.969323306	0.856201041	1.222402202	0.354854044	0.5390181	0.390450356	0.119483737	0.859695331	0.070154405	2.305479125	0.057787404	0.247176271	0.222957911	1.034636878	0.694560265	0.210581859	1.686175311	0.499576204	0.311116363	0.094577547	0.320315142	0.131140867	0.354231367	0.794990299	0.341050342	0.229102709	0.281516083	0.540423215
E07000062	2012	0.477115681	0.597383352	0.600647514	0.361408017	0.175087047	0.184632239	0.620361757	1.849799987	0.308043175	0.397599569	0.24628288	0.347135903	0.380220345	0.844892387	0.762507419	0.259294354	0.841380891	0.014738449	0.105958684	0.923242537	0.97141806	0.820457969	1.197345919	0.343795694	0.508994405	0.385939816	0.112581349	0.831375186	0.073471877	2.235450538	0.058199732	0.241527136	0.214509706	1.049993423	0.696285559	0.205121146	1.593301081	0.474715927	0.306687845	0.106379384	0.313574065	0.132587041	0.334131734	0.769987917	0.340861476	0.220304417	0.269899187	0.529375382
E07000063	2012	0.524971106	0.611876911	0.633449581	0.366391863	0.194915954	0.206744914	0.665127981	1.664626959	0.318533355	0.413145034	0.257151639	0.372841757	0.403083089	0.80431757	0.782850261	0.267744575	0.870962156	0.015969124	0.110474851	0.969496267	0.998394033	0.874348807	1.235996849	0.360418018	0.548250578	0.394641536	0.130355741	0.883442324	0.075642276	2.319399563	0.058272921	0.254865461	0.228991198	1.075867543	0.695752444	0.216764831	1.76939536	0.504002306	0.320966171	0.095322338	0.325472301	0.13437674	0.381912547	0.80731518	0.336322058	0.239500343	0.297631855	0.552365002
E07000064	2012	0.548845424	0.617884378	0.653682349	0.376946894	0.201756725	0.221348581	0.684177013	1.687886375	0.325734915	0.420093824	0.273801456	0.391515865	0.40748602	0.788588761	0.789988927	0.277068339	0.887234515	0.015852409	0.110409513	1.004240565	1.008819621	0.926093753	1.282655326	0.389117305	0.579682656	0.39642192	0.133673154	0.939380505	0.073456454	2.425061951	0.057782477	0.259968057	0.245572837	1.096700653	0.704977198	0.227938311	1.795851184	0.529577119	0.335336687	0.08346701	0.344926984	0.140712175	0.405312651	0.84663976	0.332596184	0.254074497	0.310902074	0.55224098
E07000065	2012	0.543419523	0.627974721	0.648968928	0.373021561	0.196919229	0.215359754	0.677293971	1.646751073	0.321189879	0.420087431	0.260425231	0.390963285	0.410697011	0.795582763	0.803102881	0.272927412	0.901757907	0.016274342	0.111849279	0.991332479	1.014441272	0.896609343	1.258518149	0.371741019	0.561576801	0.411386802	0.134069977	0.914314243	0.074379959	2.380600762	0.058367532	0.261482405	0.234090397	1.083880283	0.712719385	0.218968807	1.898558971	0.523469345	0.323179027	0.09761849	0.335007599	0.133774046	0.389648633	0.826241153	0.34318825	0.242951887	0.30723195	0.566459186
E07000066	2012	0.477357741	0.581674272	0.587712568	0.344412457	0.178020324	0.180806392	0.619845321	1.604928584	0.298873431	0.387783946	0.232816422	0.334521447	0.382817065	0.80376187	0.743293813	0.251393599	0.822306242	0.015908961	0.109535664	0.89709367	0.955786827	0.786257039	1.151257693	0.319774884	0.502340224	0.374349445	0.120642391	0.799605054	0.072378861	2.139544306	0.058290589	0.241200866	0.198698799	1.011827234	0.662395187	0.199851301	1.63632676	0.457002593	0.294513929	0.104769088	0.296393994	0.121273427	0.336742288	0.743608975	0.333781819	0.216786795	0.268186631	0.536481724
E07000067	2012	0.497923986	0.597896251	0.60466556	0.358420078	0.179846708	0.18848792	0.633774577	1.638505334	0.30901964	0.400783789	0.24057076	0.349981088	0.3932985	0.804762343	0.767993224	0.260619871	0.858885916	0.015922311	0.109206939	0.928628937	0.981360415	0.81840158	1.194997669	0.333599528	0.523803881	0.390119342	0.126467701	0.849924808	0.069818121	2.235742726	0.058819333	0.247304865	0.206208102	1.039363523	0.691166424	0.203980805	1.760613016	0.485399306	0.299100399	0.106431913	0.306575049	0.121018767	0.345226176	0.768406292	0.351027319	0.221511469	0.273633799	0.552927774
E07000068	2012	0.526842877	0.611528699	0.627218559	0.353407678	0.197209729	0.200427212	0.666893639	1.504367735	0.305317162	0.403933021	0.238234995	0.368229996	0.418802011	0.788540728	0.794447594	0.26324859	0.879559702	0.018786324	0.115685822	0.937890714	0.996359417	0.838153052	1.190234465	0.328863969	0.541441131	0.397790139	0.139133787	0.859051673	0.073740805	2.254829647	0.056264026	0.25625756	0.210677125	1.045674062	0.673114915	0.207664073	1.958294496	0.489681933	0.304633679	0.09970182	0.311023245	0.120682964	0.372619794	0.806130065	0.346587118	0.233171422	0.29149294	0.570291297
E07000069	2012	0.520267802	0.607840321	0.630154289	0.359022522	0.192832665	0.2046845	0.660684263	1.661598099	0.314557066	0.404582725	0.252713757	0.368346777	0.401654633	0.799769521	0.775822303	0.266773726	0.873189105	0.015835576	0.111587882	0.953856741	0.991896105	0.864001394	1.225418451	0.357423573	0.542886924	0.392455012	0.132593838	0.881567951	0.075097097	2.300653853	0.05760016	0.252957909	0.224010013	1.069101044	0.692574811	0.213577908	1.794229022	0.502416085	0.316555474	0.090405495	0.328727735	0.130545038	0.379450075	0.804517053	0.336382031	0.237277502	0.296611586	0.548519427
E07000070	2012	0.503121334	0.600466563	0.61165156	0.354939367	0.185323133	0.189182939	0.642856038	1.590514759	0.307554326	0.401268751	0.235948026	0.356265839	0.402917809	0.810032891	0.771227011	0.259231755	0.860833494	0.017893348	0.11197243	0.926210225	0.975301266	0.819245935	1.186584428	0.33040935	0.514699033	0.393797879	0.12711745	0.838096575	0.072073608	2.213585819	0.058759888	0.249337226	0.20744144	1.022846092	0.678578859	0.204269758	1.785285664	0.479590314	0.30080728	0.106052411	0.304618812	0.121000061	0.352486877	0.780184337	0.343839549	0.222487255	0.279376071	0.559207539
E07000071	2012	0.474164867	0.580018192	0.586995933	0.341867054	0.175111836	0.181617268	0.617937713	1.623757227	0.298251829	0.384906529	0.232049562	0.334788959	0.381897919	0.800198299	0.742973321	0.251304214	0.823681672	0.01549763	0.108869075	0.897131545	0.950997857	0.788920028	1.157604964	0.322481083	0.500322236	0.375307502	0.117891779	0.804135127	0.0712584	2.134902908	0.056998498	0.240085005	0.20064656	1.005665942	0.665125304	0.199405862	1.642716593	0.4606878	0.296182283	0.100405141	0.29734551	0.12038341	0.33652861	0.732659693	0.337166228	0.216353043	0.27116112	0.533059866
E07000072	2012	0.512695049	0.609840088	0.620866652	0.352708215	0.193936702	0.197069316	0.658586028	1.558098178	0.304588614	0.396597586	0.237016907	0.36284973	0.410750231	0.799881379	0.779840912	0.260966343	0.862445711	0.01817391	0.116489991	0.933496925	0.993492914	0.824094679	1.181649074	0.331736584	0.530736542	0.391853196	0.132201341	0.843904108	0.077133323	2.206499771	0.057221153	0.251677887	0.212399702	1.043979053	0.674284681	0.206954282	1.866184171	0.479189952	0.306734041	0.109278272	0.308177262	0.123558856	0.370453196	0.788345779	0.340163644	0.229886393	0.294036286	0.564605132
E07000073	2012	0.450356349	0.569850692	0.568177468	0.338471466	0.163928871	0.174825431	0.589511594	1.707801337	0.295055187	0.380782066	0.232149499	0.323453127	0.359863284	0.803160346	0.717051965	0.241904648	0.795340318	0.013988503	0.106473853	0.881372807	0.929411989	0.772300814	1.13564012	0.320918448	0.482320826	0.370747697	0.105298311	0.769630703	0.069583612	2.095863546	0.059104924	0.233888966	0.200708545	0.982618899	0.660830781	0.195895743	1.484912073	0.443726413	0.291922594	0.104114767	0.289304333	0.126986405	0.315445547	0.695823123	0.328430543	0.207804669	0.259646106	0.519732691
E07000074	2012	0.533594341	0.620974099	0.641439898	0.36103309	0.194814908	0.206340503	0.674486427	1.604712818	0.315017701	0.410789958	0.253042227	0.384221287	0.411274531	0.800418523	0.798376285	0.270423602	0.894624435	0.017378921	0.113742158	0.964544676	1.007276958	0.868374306	1.2350344	0.357091977	0.549681379	0.406310484	0.13931683	0.907266252	0.075861215	2.322597801	0.058691549	0.257975884	0.224553746	1.078595782	0.698993538	0.214055542	1.933299297	0.510738024	0.316029447	0.094976539	0.327134698	0.129348842	0.383578646	0.832111957	0.344549734	0.238216597	0.300167034	0.569705922
E07000075	2012	0.521253162	0.613284479	0.627799493	0.365885591	0.186556672	0.204567243	0.653409195	1.662098273	0.317838698	0.409866653	0.252335813	0.374494045	0.400036719	0.809733722	0.790270377	0.266595492	0.883600028	0.016051702	0.111891642	0.96452845	0.996066329	0.869459237	1.232351764	0.358795315	0.54214946	0.406817895	0.130085514	0.892677287	0.072230484	2.321845637	0.059162261	0.255116059	0.223638157	1.057452474	0.704400156	0.21010488	1.842107943	0.508574462	0.311251206	0.104782094	0.325555257	0.128987241	0.371986925	0.805696347	0.345367263	0.230173451	0.293529735	0.559757869
E07000076	2012	0.534358171	0.603464098	0.63529463	0.372465815	0.192561356	0.21350936	0.659166537	1.7223933	0.324050751	0.415767459	0.268643315	0.383130008	0.392955398	0.794613041	0.784643188	0.270770039	0.876457553	0.015417631	0.107351647	0.982546825	0.98526977	0.90147237	1.253599543	0.379593398	0.560341749	0.393789957	0.129121745	0.915766962	0.071426261	2.387687609	0.058570109	0.251823926	0.239056986	1.066374555	0.701633784	0.217850326	1.729797102	0.521727295	0.323701806	0.088459873	0.338952758	0.138998935	0.385410975	0.838721745	0.32790042	0.23988784	0.297580913	0.540326227
E07000077	2012	0.516718932	0.60821915	0.620395044	0.349257104	0.192514052	0.198339115	0.657542091	1.502252875	0.302749404	0.401540242	0.233715745	0.361859681	0.408674587	0.770377061	0.786588684	0.258848045	0.873948526	0.016164798	0.112204066	0.932887255	0.994522652	0.8307679	1.185758885	0.330888808	0.531251782	0.400014258	0.135447648	0.847177631	0.073348209	2.22721349	0.05608262	0.254953929	0.207989289	1.043508921	0.681010679	0.206752346	1.922994791	0.486056738	0.30154041	0.103939447	0.306740436	0.119173023	0.365037707	0.775417979	0.344970416	0.230326908	0.289060071	0.563515123
E07000078	2012	0.46060322	0.573264983	0.578890928	0.329190591	0.175338753	0.176742242	0.611427636	1.610503391	0.284427444	0.371967858	0.224045821	0.33000743	0.384487918	0.78320525	0.727255906	0.242487987	0.802592493	0.016377077	0.108796452	0.874491059	0.923951732	0.766513401	1.125861997	0.306466024	0.492898101	0.360312194	0.115739286	0.766844401	0.073130821	2.076100203	0.053645658	0.234743525	0.196985556	0.980351686	0.641071597	0.1945465	1.641826958	0.44553192	0.292325179	0.086993764	0.286577239	0.117368649	0.328968506	0.730326863	0.332708265	0.214861823	0.267783203	0.520940789
E07000079	2012	0.525134874	0.613826161	0.631741092	0.363502182	0.188614545	0.208229986	0.655494416	1.727334673	0.318925508	0.414648044	0.259801533	0.380061074	0.395726419	0.7997871	0.780550119	0.266969767	0.876854731	0.015081225	0.108351263	0.973384325	0.984491449	0.881710695	1.249261409	0.369293782	0.546639206	0.400726733	0.126971551	0.895539724	0.073154425	2.348801772	0.05772561	0.253990661	0.233227252	1.064230795	0.703379063	0.214656065	1.775157185	0.513533441	0.319469004	0.087903188	0.331220779	0.135934763	0.37554771	0.80631423	0.33483919	0.236405107	0.297500896	0.543261201
E07000080	2012	0.516370006	0.596250308	0.620207201	0.356575839	0.185051755	0.201430339	0.644042172	1.662280329	0.31045082	0.400527299	0.252095166	0.366491073	0.392893949	0.788494567	0.768881782	0.262704849	0.864531703	0.015552471	0.106851692	0.943907359	0.971809014	0.856964869	1.215580898	0.355920952	0.538428174	0.390550805	0.128394418	0.884993192	0.069261811	2.297010955	0.056844663	0.248508342	0.222110658	1.054177696	0.692237063	0.208636903	1.798092532	0.50370915	0.309636334	0.089814871	0.319821811	0.127987217	0.363862825	0.796027851	0.340317346	0.231305308	0.289760961	0.539995456
E07000081	2012	0.444476035	0.556475286	0.563491494	0.340272253	0.16752619	0.169860579	0.594157424	1.660697966	0.291897942	0.376448764	0.224358138	0.310215393	0.363442977	0.809840202	0.714552347	0.242288748	0.786846983	0.013587404	0.105231194	0.864158446	0.92514167	0.757171041	1.126537164	0.309213052	0.47564163	0.355592223	0.110588618	0.7630045	0.071408143	2.062000219	0.056124462	0.232396577	0.190102096	0.987332091	0.651031518	0.193422084	1.457619324	0.433935799	0.286962547	0.111381682	0.289686077	0.120007975	0.317229521	0.696550098	0.328311784	0.207665674	0.252273505	0.509579955
E07000082	2012	0.518240766	0.606966651	0.622693979	0.345570869	0.19106547	0.198950245	0.653151246	1.54739391	0.296313759	0.397904832	0.237160089	0.368374656	0.403816784	0.755555338	0.781347136	0.257227486	0.867301261	0.015844383	0.106351007	0.926929033	0.971504626	0.836957331	1.183305597	0.336810915	0.532606804	0.394129661	0.133188531	0.847463507	0.071786153	2.243665947	0.05327159	0.251901082	0.212011504	1.031506566	0.66939729	0.207963926	1.887525218	0.494307047	0.303752918	0.090673531	0.311406754	0.120598774	0.367504169	0.783545958	0.335048138	0.234779034	0.28717617	0.54224305
E07000083	2012	0.511152157	0.600627503	0.614599848	0.359032867	0.183756753	0.194940335	0.639956141	1.662239284	0.310649122	0.40968982	0.247573952	0.362389612	0.393236526	0.786476228	0.777815283	0.261693952	0.867646166	0.01508604	0.104195475	0.943311735	0.968222147	0.846482972	1.213591117	0.347170191	0.533833951	0.391857639	0.12704596	0.863708163	0.068945154	2.296149848	0.056849662	0.251237859	0.216225596	1.031191164	0.691162862	0.209147613	1.756438056	0.499176466	0.303422409	0.098350076	0.311909455	0.124850462	0.352917497	0.786535776	0.341057504	0.22854097	0.276927107	0.539073601
E07000084	2012	0.492776953	0.59890593	0.605782563	0.347814301	0.188734298	0.183765092	0.645408049	1.57008543	0.301893648	0.391143892	0.229361108	0.340461997	0.405851427	0.80830514	0.760895463	0.256395394	0.843405741	0.016959879	0.115494479	0.911702338	0.984134519	0.791542192	1.16666023	0.315410363	0.512086604	0.379953158	0.130520246	0.813933002	0.077125574	2.145103707	0.05713493	0.249047429	0.199141069	1.043847782	0.674845025	0.203587781	1.762756455	0.460771456	0.301468738	0.109890285	0.297573114	0.118500474	0.35159284	0.751307996	0.347017967	0.22415133	0.279825678	0.556812111
E07000085	2012	0.536560644	0.617919373	0.637448824	0.359420943	0.203693092	0.202192069	0.676092481	1.545602815	0.311900516	0.412471097	0.244200201	0.373420965	0.421387427	0.80079912	0.789730872	0.267514387	0.884983901	0.017946284	0.114889884	0.949408532	1.011710251	0.85448356	1.211657145	0.340809416	0.544136908	0.401281391	0.140402139	0.874440733	0.075133052	2.28195286	0.057951077	0.260321194	0.216526811	1.065710444	0.683859391	0.214729953	1.904544184	0.495002761	0.315723113	0.098895121	0.315492273	0.1245728	0.38479969	0.803725536	0.34470829	0.239708869	0.297577681	0.573470024
E07000086	2012	0.500369206	0.598042881	0.609755856	0.354154495	0.190759409	0.188443958	0.649701749	1.600072079	0.30816717	0.398619627	0.237076678	0.344465957	0.402707257	0.81393787	0.769863006	0.259607724	0.848838731	0.01664249	0.112301534	0.924825395	0.98704676	0.811658209	1.187213085	0.325234035	0.518362602	0.380649182	0.130330716	0.83117619	0.076724584	2.194043734	0.057546632	0.250996532	0.207423567	1.048207863	0.678693415	0.207250356	1.733713162	0.469217794	0.304971196	0.107703098	0.303083605	0.123444241	0.357992373	0.75488618	0.344802021	0.228647847	0.280533668	0.553728908
E07000087	2012	0.533434807	0.616357777	0.63671235	0.357152065	0.200142721	0.203602606	0.677386888	1.568921434	0.310581151	0.409566579	0.247238325	0.366944248	0.417033041	0.793919603	0.794915586	0.266315976	0.88634912	0.016621452	0.112067379	0.954884993	1.001805048	0.856320584	1.219656127	0.343942897	0.548047354	0.39699888	0.137601375	0.871304639	0.075348138	2.293822088	0.057113608	0.258464973	0.216848809	1.065070622	0.691346448	0.21417003	1.882814469	0.500957604	0.313110201	0.093025107	0.317934679	0.125703135	0.378979412	0.796692828	0.347388131	0.240261659	0.297741917	0.561990706
E07000088	2012	0.492003523	0.594822677	0.598249871	0.352636074	0.174865434	0.184242091	0.622186141	1.745989719	0.306057414	0.404215638	0.241902746	0.348547464	0.382946021	0.810494882	0.768945046	0.25813425	0.857835011	0.015650393	0.103021643	0.922954906	0.959754326	0.826089545	1.19131986	0.335448349	0.521606039	0.389994832	0.122507094	0.839750519	0.065990059	2.271533212	0.056947249	0.245003762	0.207485109	1.024974812	0.692193878	0.203281351	1.690993253	0.487390521	0.296739388	0.103200676	0.306529336	0.121092149	0.334746986	0.78433533	0.345549411	0.218796353	0.261011667	0.534958411
E07000089	2012	0.524968415	0.618626672	0.632142564	0.35704247	0.196732814	0.200501641	0.671400321	1.502871795	0.310943371	0.410139471	0.238000473	0.371670462	0.419271074	0.799347851	0.791273988	0.266161891	0.886370547	0.018242737	0.120292948	0.952276866	1.013191263	0.835664771	1.203395835	0.33564592	0.53332389	0.40855207	0.139889939	0.861952563	0.076668935	2.234546628	0.059175666	0.258933888	0.210422276	1.046955406	0.688042882	0.209667461	1.975183362	0.487425131	0.308757511	0.109435896	0.313285921	0.122529539	0.378985434	0.797572765	0.347156075	0.232944068	0.29783824	0.583668171
E07000090	2012	0.510426047	0.599179585	0.61907183	0.371274818	0.182154416	0.200215987	0.639050401	1.758419613	0.321493472	0.411703086	0.256264256	0.368162642	0.390076229	0.830573837	0.781237941	0.269518872	0.870178975	0.015721871	0.108776245	0.960231045	0.983496322	0.865678918	1.233866761	0.360604981	0.54196104	0.395928868	0.12743138	0.894401147	0.068725675	2.344232192	0.059612697	0.248924376	0.221510134	1.057580242	0.706405346	0.209575609	1.72187595	0.507850326	0.312848904	0.10190165	0.328692517	0.130887538	0.361488161	0.810261321	0.344862395	0.227185341	0.280919075	0.548431539
E07000091	2012	0.550427719	0.621041767	0.649522005	0.378723951	0.198324937	0.214442288	0.67877745	1.671771997	0.326226678	0.424627689	0.26385937	0.386533449	0.411566979	0.809800229	0.819626704	0.276851356	0.905528125	0.016497441	0.10901675	0.996265758	1.010830077	0.909510442	1.271425126	0.375139266	0.57322832	0.405419536	0.137037323	0.93130248	0.071819695	2.424446558	0.058060699	0.260332318	0.234731768	1.092384097	0.712198513	0.220637544	1.859199058	0.534996718	0.32403473	0.098377775	0.335684572	0.133609223	0.393124088	0.846271042	0.346582018	0.244040319	0.30172218	0.558736497
E07000092	2012	0.453417477	0.574900383	0.571965482	0.349695533	0.169090615	0.169256827	0.598934714	1.714314544	0.302520413	0.387282824	0.229004225	0.313491515	0.373958281	0.849434394	0.737373181	0.251356743	0.813829472	0.014893478	0.112237076	0.893254865	0.964336948	0.767043421	1.161139855	0.312836727	0.485362132	0.373494463	0.110080452	0.792090575	0.071427165	2.11889686	0.060755286	0.238173586	0.189261616	1.02786116	0.681039891	0.196239946	1.527066088	0.44470375	0.292096751	0.118538148	0.289375681	0.119995978	0.312615945	0.703688538	0.353217402	0.206198898	0.257064118	0.54737624
E07000093	2012	0.507052216	0.608161739	0.622438131	0.351222173	0.188740238	0.198488825	0.656995489	1.623690827	0.311478324	0.404248862	0.247392205	0.357018014	0.400498442	0.800033193	0.763420333	0.262141083	0.859724234	0.015108173	0.111707869	0.943942477	0.992169284	0.844181157	1.220165656	0.346516267	0.532942638	0.389424645	0.129574727	0.860586325	0.075876038	2.246946504	0.05867642	0.255265458	0.216115864	1.060521583	0.689266708	0.213345402	1.749316705	0.487553429	0.314590885	0.089895892	0.31537226	0.128059459	0.369273913	0.766772204	0.341220094	0.235527402	0.290271086	0.551639384
E07000094	2012	0.523364788	0.612933851	0.628076045	0.35534445	0.196251335	0.201885748	0.66521887	1.517474005	0.306449256	0.40470654	0.238319241	0.37214931	0.415567194	0.785277795	0.787487464	0.261369005	0.874252394	0.017959899	0.11514912	0.944663223	0.99641404	0.838994044	1.194041007	0.335041172	0.534727173	0.399356691	0.135389188	0.855558325	0.075194765	2.230704264	0.057152827	0.255518108	0.214789289	1.039927313	0.678157641	0.209463701	1.91076089	0.488530471	0.309713549	0.101801328	0.310546124	0.123803044	0.375886154	0.79761393	0.340072692	0.235318854	0.298068287	0.567725942
E07000095	2012	0.475801841	0.583526854	0.583368877	0.343788595	0.180465078	0.182922395	0.615028659	1.517769684	0.292007349	0.381973292	0.231299334	0.3259746	0.386058151	0.789520978	0.72740691	0.250000973	0.81252007	0.015867254	0.113447008	0.886424352	0.965705023	0.775292295	1.141342528	0.315287617	0.501903367	0.371891422	0.119529181	0.807002688	0.070884643	2.102865642	0.058682548	0.240409948	0.195337736	1.018442391	0.651519667	0.198926398	1.670864509	0.455116189	0.29464142	0.106935096	0.290235617	0.119568406	0.337555902	0.720943165	0.333553028	0.216373681	0.274351856	0.544636483
E07000096	2012	0.478790727	0.582837497	0.593706874	0.33829465	0.18154116	0.184375815	0.630409426	1.570282711	0.297871548	0.386867713	0.229841432	0.337102143	0.389626678	0.788781819	0.736823047	0.250261272	0.82041982	0.015686073	0.111478539	0.901736001	0.960708396	0.789284756	1.15446711	0.318087141	0.50260955	0.37314521	0.122020925	0.792401543	0.076126051	2.116684175	0.055956368	0.243555311	0.201050148	1.014038189	0.660878953	0.20241836	1.664620908	0.450104856	0.300327489	0.098974003	0.296371731	0.12176582	0.345444609	0.727723114	0.332642512	0.222051621	0.276341351	0.539123939
E07000098	2012	0.485501409	0.588189752	0.596407455	0.348640321	0.17947255	0.187261997	0.628709348	1.562398967	0.303794838	0.395032686	0.232844948	0.342675998	0.389976561	0.795282988	0.756670942	0.253037754	0.838844088	0.015736773	0.110611654	0.917114207	0.973597098	0.800030973	1.168521031	0.323068689	0.507722934	0.385734114	0.121199294	0.811487958	0.073489281	2.152005233	0.058562932	0.244981958	0.203079519	1.017715517	0.671161476	0.201724729	1.693644636	0.462245737	0.296730492	0.107217045	0.298285946	0.121647596	0.342239216	0.735955974	0.341491257	0.219012677	0.273317865	0.547774476
E07000099	2012	0.492605329	0.594983057	0.60207398	0.349650342	0.18422365	0.186127468	0.637576944	1.604334113	0.307372385	0.396623592	0.237803164	0.347632197	0.395532182	0.812438878	0.757314623	0.25686963	0.839395943	0.016754443	0.113660019	0.922341175	0.97635041	0.808486609	1.178759401	0.325491348	0.516419274	0.381872482	0.125260758	0.820370235	0.074818325	2.183851379	0.059060521	0.247725128	0.205053428	1.026504134	0.673793896	0.204383398	1.716406615	0.468427393	0.302321169	0.10370553	0.300758025	0.123007867	0.350195442	0.767303279	0.339064636	0.221914285	0.276682848	0.55521142
E07000102	2012	0.474810299	0.579396744	0.594044332	0.339026538	0.187578696	0.185767899	0.638395458	1.548790095	0.3036528	0.384514747	0.234463821	0.33394738	0.393834078	0.802738944	0.723268343	0.254064772	0.807112476	0.015456917	0.115444605	0.905333793	0.977974677	0.788106942	1.159135133	0.3208841	0.499813251	0.369904575	0.121897078	0.800203583	0.080684391	2.075418408	0.058580633	0.245783315	0.203662539	1.029269411	0.659424163	0.206109472	1.606157558	0.442021351	0.307405714	0.097170226	0.29643996	0.126679066	0.361994638	0.708807688	0.326877587	0.225997994	0.28218534	0.548598015
E07000103	2012	0.452576087	0.56973148	0.566895906	0.321045396	0.187401925	0.167502208	0.61632671	1.476958577	0.278620782	0.359556091	0.204359276	0.307078865	0.395709814	0.778996912	0.709030446	0.239330978	0.779971762	0.016999741	0.116650634	0.84415302	0.945112088	0.71093551	1.079225039	0.278710276	0.471431632	0.349664043	0.121319597	0.710802409	0.080920861	1.904730901	0.054276834	0.236099851	0.179624705	0.985901255	0.620139319	0.192206922	1.587697331	0.402001585	0.288931806	0.114707326	0.267473028	0.110170264	0.33591152	0.677649207	0.32654382	0.213611642	0.267228429	0.537007097
E07000105	2012	0.491689581	0.589179828	0.599219953	0.351573166	0.177096435	0.188355902	0.626909909	1.661534603	0.311501363	0.400479205	0.242488751	0.34235339	0.381996085	0.80843942	0.756637377	0.258428293	0.844121696	0.01483254	0.10666333	0.927424727	0.969808146	0.817855094	1.192746398	0.337545821	0.510602427	0.38660361	0.119519698	0.835454005	0.071129047	2.214642312	0.060350791	0.245372308	0.209395812	1.030330255	0.690582335	0.204175266	1.635908688	0.476735427	0.300461677	0.103127903	0.3056199	0.126005289	0.339117249	0.744920379	0.34089776	0.219320357	0.273464849	0.543847636
E07000106	2012	0.482758966	0.578105586	0.591271214	0.353846254	0.176765973	0.188896491	0.617560943	1.718811908	0.308481899	0.389050843	0.245471494	0.345873601	0.38035881	0.821126807	0.746417331	0.252656702	0.825192522	0.01592562	0.108515661	0.913792612	0.954669091	0.815810604	1.177644629	0.338525414	0.510840142	0.377964296	0.116603917	0.835852011	0.070568002	2.210130115	0.059017215	0.238213331	0.214447166	1.014832757	0.671618278	0.201357012	1.60943653	0.47358377	0.302592956	0.096377528	0.306779725	0.128112107	0.346415467	0.771802767	0.329591991	0.216908454	0.275206259	0.536014872
E07000107	2012	0.464261651	0.574048309	0.580056839	0.34301763	0.1732739	0.175355814	0.611636245	1.612252571	0.299261329	0.38388218	0.226383546	0.324406566	0.382237095	0.805139384	0.738493494	0.249312451	0.820029343	0.015622671	0.110071655	0.889897608	0.956582071	0.776521108	1.146698081	0.309439601	0.49505267	0.372470251	0.118270412	0.785903869	0.071854002	2.112881561	0.05772074	0.237280837	0.191540669	1.008321055	0.665451205	0.196260771	1.626045855	0.448522049	0.292909397	0.103923873	0.292583286	0.116662634	0.324659591	0.720564065	0.34630324	0.212138631	0.263388392	0.539149312
E07000108	2012	0.515314467	0.604034605	0.622000927	0.36652158	0.184735453	0.198356038	0.645662156	1.741696559	0.316647854	0.410455177	0.255114839	0.368868213	0.394281773	0.817552679	0.782771808	0.266494311	0.874917796	0.016393944	0.108065891	0.955366041	0.984568779	0.860877032	1.228813952	0.355267316	0.539970896	0.393697175	0.12910111	0.885571389	0.071199429	2.335606557	0.058491259	0.248504776	0.221834984	1.057721287	0.700582575	0.210282533	1.769749812	0.502660261	0.310696789	0.099120794	0.324505047	0.129596424	0.358574273	0.817753358	0.34592354	0.228949209	0.28177488	0.547951975
E07000109	2012	0.45713679	0.55922278	0.579639225	0.334815067	0.186106235	0.178919848	0.625965238	1.610236631	0.298158575	0.371092623	0.224724654	0.315706478	0.381755617	0.81240363	0.709595989	0.245283589	0.775975958	0.014513301	0.114140881	0.87838645	0.958873375	0.757144495	1.123346352	0.310154619	0.477855918	0.35091871	0.117094771	0.757926239	0.085685607	2.002929237	0.057281484	0.236343916	0.200484968	1.021220488	0.648556315	0.201293882	1.46760376	0.420108838	0.302248056	0.106295301	0.289341798	0.125853677	0.351737108	0.695879602	0.317857721	0.221955178	0.278242624	0.523436
E07000110	2012	0.498079514	0.593864642	0.608234758	0.350104288	0.186249876	0.189928091	0.643512353	1.609688042	0.307429208	0.395467155	0.237936077	0.34690036	0.39863711	0.803264689	0.764406093	0.258730308	0.851516012	0.015996929	0.110175854	0.921257549	0.982873809	0.816462277	1.185729055	0.331143891	0.516969961	0.386029436	0.127559144	0.837537752	0.073641399	2.197726068	0.058799126	0.248262611	0.208248474	1.030960552	0.677107907	0.206278211	1.730508574	0.474127428	0.303027992	0.101922762	0.30589721	0.122731893	0.353539425	0.749361383	0.344332136	0.226412624	0.2825692	0.551886787
E07000111	2012	0.521471234	0.609521646	0.625000132	0.365542905	0.190995716	0.19958439	0.658883553	1.614220973	0.316731735	0.41165157	0.247547498	0.364504156	0.405171763	0.80356099	0.788031417	0.265599569	0.87539019	0.016308255	0.111109418	0.955360812	1.002233349	0.851061841	1.220196438	0.345214493	0.539290481	0.398237803	0.1320489	0.869342664	0.0739978	2.289936682	0.058620779	0.2555053	0.217732819	1.058851483	0.697000214	0.211791482	1.818711032	0.494683584	0.310162559	0.108498204	0.316142948	0.126926367	0.368169416	0.793489993	0.346776322	0.23187444	0.289145367	0.562794354
E07000112	2012	0.513216796	0.599852811	0.618697961	0.349859312	0.192768314	0.197318277	0.651462392	1.640249084	0.299544441	0.399291257	0.243945815	0.358650954	0.399113593	0.774991042	0.768167665	0.256950091	0.857633766	0.01593508	0.106755186	0.930275724	0.974993734	0.842206301	1.189212418	0.343387177	0.532695533	0.384524981	0.128712052	0.840822878	0.073534876	2.253035682	0.05374629	0.246809019	0.215602658	1.047385867	0.673968651	0.211615913	1.752452826	0.484338424	0.310464202	0.089207714	0.313730798	0.126356194	0.364529125	0.788930391	0.333066682	0.23633557	0.28757634	0.535692229
E07000113	2012	0.495555734	0.589900183	0.597299018	0.357105077	0.176171701	0.185388886	0.624008108	1.676919486	0.309254347	0.394599643	0.240542145	0.346255093	0.383312071	0.812574251	0.774297453	0.260195513	0.850549267	0.015545084	0.105207489	0.921911138	0.970248385	0.816344246	1.188227582	0.335540138	0.516381794	0.388177318	0.121262241	0.846746065	0.06903289	2.235210723	0.058729645	0.243796244	0.209624837	1.032645673	0.693962329	0.202158732	1.703871991	0.482726927	0.295669745	0.113473904	0.304291533	0.122209297	0.335724811	0.77141532	0.349385712	0.218402962	0.272544529	0.541785835
E07000114	2012	0.498890777	0.594293476	0.610511919	0.36586242	0.176795464	0.195471227	0.631875151	1.79514252	0.316680345	0.408124199	0.254273573	0.361611612	0.378234073	0.821696278	0.776681512	0.26515027	0.858102888	0.014892507	0.103736092	0.952592493	0.968085411	0.853676627	1.222287971	0.361274946	0.530679149	0.393664127	0.117665318	0.869578545	0.068986914	2.310213678	0.059048492	0.243282072	0.222959126	1.045698833	0.701566956	0.208755034	1.612715323	0.498501944	0.310341694	0.101013536	0.327005932	0.133217184	0.350863817	0.798201836	0.335739632	0.223957684	0.277353267	0.530740523
E07000115	2012	0.495613989	0.59158893	0.607632785	0.355836152	0.183076568	0.191564891	0.639065861	1.676320276	0.319026989	0.404826511	0.245428825	0.351190766	0.390054201	0.83211503	0.757071434	0.260813916	0.847979155	0.01510818	0.112504722	0.938898839	0.987007896	0.827401513	1.205690789	0.340111616	0.51594838	0.391159581	0.123843937	0.848266464	0.076363119	2.219568838	0.061782749	0.247426929	0.214173163	1.044122953	0.696472275	0.205810292	1.665385783	0.476249143	0.307781696	0.102864826	0.311425551	0.130119224	0.35454606	0.754445017	0.339394499	0.222327801	0.281839318	0.557678059
E07000116	2012	0.506673508	0.601581504	0.609686746	0.355120808	0.184395228	0.189578515	0.641844813	1.569726895	0.309666877	0.401632053	0.23616718	0.359788788	0.405215827	0.804268946	0.774872408	0.260956075	0.860281777	0.018304818	0.114745219	0.9327628	0.981472016	0.825263366	1.189371213	0.330075578	0.52287078	0.396829934	0.129440965	0.851497084	0.07026163	2.229467163	0.058590961	0.24816397	0.20744796	1.023094449	0.680710062	0.20407863	1.85680133	0.482095401	0.301089705	0.10569547	0.303910594	0.119278999	0.353928919	0.790904618	0.350841806	0.222379798	0.280929552	0.568995693
E07000117	2012	0.445217819	0.544802323	0.560768324	0.321876724	0.169417463	0.170310676	0.597180429	1.612137318	0.284592316	0.363613254	0.222718353	0.310169674	0.3588875	0.77935631	0.694661556	0.238437865	0.766124745	0.013701902	0.103238837	0.850769639	0.900699462	0.746306084	1.09916161	0.309338646	0.468316519	0.344482012	0.109973348	0.748295158	0.073805342	2.005064314	0.053420108	0.226988234	0.192231466	0.970456367	0.631194819	0.194112456	1.432175668	0.424954326	0.287983339	0.095298251	0.288562421	0.120019531	0.324454295	0.698007899	0.310303697	0.211752543	0.256538553	0.49120001
E07000118	2012	0.486152198	0.583597928	0.593385693	0.343665475	0.175935786	0.184046522	0.617997271	1.65666514	0.302023361	0.392213542	0.236648587	0.341820439	0.379638501	0.786802358	0.74990402	0.25184947	0.839625982	0.014475745	0.103306492	0.907332087	0.947195337	0.802957131	1.171441773	0.331427498	0.504282533	0.381227587	0.120203211	0.825519149	0.069103665	2.18928433	0.056422684	0.240953144	0.205370234	1.00956998	0.676607025	0.200002183	1.667636523	0.476214652	0.293682459	0.094311359	0.301434093	0.121139504	0.333348436	0.743226996	0.338880016	0.216921264	0.268005646	0.528335978
E07000119	2012	0.517350095	0.60035092	0.623415236	0.357573419	0.188567757	0.203559839	0.648067678	1.666329968	0.311986278	0.403594431	0.254522745	0.379688096	0.393093482	0.789316628	0.776360342	0.263407888	0.86165673	0.01671047	0.107892599	0.955652468	0.960771161	0.869106644	1.218793585	0.360664742	0.545208936	0.391761895	0.128423818	0.888385855	0.070665905	2.324423153	0.055830922	0.246937755	0.228084041	1.040333585	0.683976168	0.210427489	1.78248145	0.50778939	0.313548764	0.085108812	0.325864493	0.131269783	0.37369086	0.81977947	0.32994796	0.233137602	0.290251021	0.536623891
E07000120	2012	0.444676069	0.554814392	0.560619841	0.323272487	0.169861104	0.172708888	0.589528503	1.630116607	0.281672864	0.362982447	0.216920431	0.312954024	0.358592119	0.765531888	0.706278253	0.236810567	0.775885185	0.013137969	0.102719943	0.851645485	0.905324615	0.747812566	1.099272217	0.311901536	0.47042121	0.352622852	0.107151946	0.753079738	0.072395258	2.012295005	0.052737572	0.229153719	0.19301826	0.969783691	0.636160657	0.192166277	1.482345004	0.430317389	0.287502502	0.104046956	0.287293365	0.118447145	0.322442329	0.681399311	0.316245899	0.210713003	0.259726552	0.496278827
E07000121	2012	0.474425262	0.572793544	0.585000152	0.348253001	0.17293165	0.182940228	0.609489759	1.73378034	0.302916451	0.387499075	0.239306836	0.341708947	0.372756792	0.817171788	0.745584517	0.251298254	0.818577551	0.015360579	0.105092137	0.906009889	0.933926316	0.804951786	1.168153004	0.333047756	0.503924307	0.372390373	0.115561405	0.824073746	0.069991743	2.197486887	0.056448987	0.234625516	0.208993001	1.001272924	0.671201471	0.197889651	1.585178931	0.472731833	0.296749661	0.09889728	0.306133429	0.124780317	0.334012089	0.768603763	0.328821144	0.212760847	0.264480528	0.51933072
E07000122	2012	0.443382815	0.54549514	0.557336842	0.336587842	0.16512485	0.171250795	0.58372197	1.684607313	0.289773603	0.371608436	0.225953722	0.311065299	0.354124875	0.785178014	0.701189028	0.239104	0.77645928	0.013128046	0.100752145	0.859421064	0.907581368	0.755114052	1.11099589	0.31437812	0.469886305	0.35176801	0.107070992	0.761829899	0.070494563	2.044263826	0.054701941	0.226622643	0.195748706	0.973196772	0.644005008	0.192985711	1.429237961	0.430902432	0.285794444	0.109726338	0.290505581	0.122205593	0.317403784	0.693288239	0.314949787	0.207138388	0.251453675	0.496180394
E07000123	2012	0.409578974	0.518374836	0.535695171	0.306728263	0.16890644	0.159565616	0.580710179	1.612266366	0.277078688	0.344644356	0.205983396	0.284286753	0.350678168	0.797633126	0.667760418	0.226143913	0.714727501	0.012827092	0.105733012	0.812858022	0.884380828	0.69289923	1.049726946	0.285610229	0.433997556	0.320679904	0.101114083	0.680722355	0.081098785	1.848271215	0.052081864	0.220145629	0.182016997	0.940633873	0.607269393	0.187300495	1.273617085	0.383833709	0.285058109	0.098749912	0.273484317	0.118806857	0.315400104	0.636623158	0.300104235	0.205493453	0.250441063	0.480126784
E07000124	2012	0.517042842	0.601289327	0.616045546	0.343964558	0.187508331	0.197933288	0.646705093	1.532549753	0.300906336	0.399128173	0.240562848	0.365524206	0.396724583	0.756857238	0.779965815	0.258947872	0.865535063	0.015920142	0.106223486	0.9279857	0.970972086	0.844840522	1.185895063	0.339038121	0.537504072	0.39312541	0.132140929	0.863759961	0.068801917	2.259448032	0.053281726	0.250388255	0.212882948	1.027187373	0.675548028	0.205630042	1.890796695	0.494982577	0.300583538	0.08753485	0.31259632	0.119537411	0.361790274	0.794486872	0.337569453	0.230621859	0.283507026	0.542072774
E07000125	2012	0.47884973	0.580476124	0.582544145	0.337635218	0.172083794	0.177285206	0.607689681	1.637134268	0.290085652	0.38559974	0.227563232	0.337913037	0.376595774	0.774279518	0.751691587	0.250958794	0.83831391	0.015356236	0.100973493	0.885617978	0.932676855	0.792033341	1.142349281	0.321708151	0.498339601	0.381180603	0.120164212	0.807578026	0.065253224	2.173214984	0.054046516	0.238217179	0.196764443	0.996492292	0.662338909	0.196849452	1.705744081	0.465478443	0.286019693	0.101617695	0.296766677	0.115076208	0.327615964	0.746553827	0.335978885	0.213788432	0.256678415	0.519890765
E07000126	2012	0.483255991	0.57770991	0.590015129	0.340851189	0.173188984	0.183019095	0.614313722	1.654905473	0.302006165	0.393017749	0.238076025	0.337406894	0.373707534	0.788491394	0.747767058	0.25318935	0.833601344	0.014657661	0.102122587	0.90530324	0.933456314	0.807831453	1.174129815	0.334765425	0.505816447	0.381138087	0.11759684	0.829410523	0.066972414	2.203994989	0.055806715	0.238614038	0.205526367	1.007323	0.675672375	0.200310278	1.625686357	0.474171686	0.293818616	0.092438775	0.304357174	0.120611739	0.332719159	0.746356821	0.336491548	0.215754636	0.264724994	0.52011952
E07000127	2012	0.492707248	0.582589747	0.597071771	0.357237693	0.172720119	0.190340031	0.613166743	1.733986488	0.312846011	0.398791127	0.247125653	0.351757605	0.375485776	0.814260589	0.757986123	0.256217566	0.847451125	0.014769461	0.103359903	0.922588218	0.95430482	0.830898363	1.199065258	0.345381688	0.514755223	0.388094587	0.120043523	0.858725191	0.067119619	2.262562925	0.059043302	0.239036368	0.214292987	1.023593728	0.69120136	0.199771173	1.659704333	0.492185456	0.299635674	0.098052219	0.316362923	0.126837526	0.335450207	0.777699657	0.340461287	0.214569519	0.269476838	0.532109277
E07000128	2012	0.517079496	0.59351391	0.619780766	0.362243865	0.183961585	0.203561505	0.641080166	1.714954444	0.315439915	0.406925395	0.258549042	0.372560567	0.383634829	0.793123381	0.770498028	0.263091131	0.860853288	0.015001223	0.105615575	0.956944858	0.958397123	0.872037573	1.229321638	0.367008555	0.542311266	0.392069158	0.123939692	0.892710113	0.06825644	2.336140045	0.057236704	0.247056351	0.228760151	1.032454983	0.694666896	0.210388809	1.712022382	0.511342586	0.312957571	0.089532477	0.328711062	0.132146014	0.366353252	0.811034332	0.329341279	0.229723621	0.287438425	0.531549505
E07000129	2012	0.492502623	0.584412185	0.600038055	0.343983853	0.187588412	0.188418976	0.641751726	1.552639899	0.30311275	0.390768289	0.236104227	0.339701694	0.39335184	0.78872841	0.745597228	0.255335546	0.829190018	0.015278816	0.110159021	0.912136023	0.969923083	0.807678471	1.17104515	0.326114913	0.512975426	0.372742118	0.12836156	0.821516056	0.075144263	2.16007303	0.056541568	0.248038059	0.20725313	1.030634729	0.668107768	0.206410823	1.674106799	0.462118233	0.302572446	0.098609796	0.301925984	0.123334943	0.357745432	0.741829493	0.332817022	0.227733366	0.27878682	0.539536197
E07000130	2012	0.458897275	0.559549981	0.577101521	0.328462202	0.180792097	0.179033126	0.618172932	1.602892508	0.29312319	0.371677278	0.226654261	0.317749527	0.376166065	0.797548988	0.709673015	0.242496869	0.784676942	0.014321347	0.108853685	0.870546496	0.932547949	0.765519742	1.127556992	0.312072037	0.482062062	0.35029882	0.115783383	0.76676577	0.077972562	2.043124714	0.055330607	0.235770815	0.199197042	1.000934014	0.641280028	0.198629006	1.496799136	0.434403574	0.298085817	0.09089055	0.293887984	0.123288991	0.343556824	0.709770001	0.319101868	0.218811315	0.270259875	0.51121568
E07000131	2012	0.509651584	0.604533687	0.615901601	0.350166624	0.189052066	0.197593416	0.64969438	1.578403911	0.310148779	0.401203916	0.242655684	0.362526033	0.398426523	0.78542176	0.768012863	0.26049023	0.858598016	0.015458137	0.110191167	0.940510546	0.98627066	0.833363157	1.198918818	0.341731067	0.527300649	0.394585936	0.130360547	0.853977752	0.074769653	2.232806922	0.057655565	0.253474556	0.215585244	1.043550712	0.687268934	0.208212878	1.796290038	0.486645188	0.305487736	0.097825566	0.310400094	0.125341617	0.367167751	0.762543904	0.337867223	0.228932935	0.288005189	0.556745376
E07000132	2012	0.501905506	0.594049302	0.611666304	0.354830529	0.180320312	0.190882591	0.636932304	1.694055415	0.310206707	0.401175454	0.245866896	0.353795076	0.389213429	0.811763047	0.770447866	0.260592961	0.857601914	0.015512918	0.106076653	0.933107922	0.963113515	0.834744886	1.206819141	0.344721926	0.524187962	0.386910996	0.126207672	0.859737515	0.070330849	2.274441314	0.057501696	0.246906325	0.213343433	1.03882731	0.690137608	0.206218449	1.715786208	0.494255631	0.303636604	0.098503843	0.312446132	0.124430243	0.3502937	0.783747639	0.344820419	0.223123243	0.274885272	0.536505327
E07000133	2012	0.496146421	0.606595448	0.612954863	0.350830315	0.177744123	0.193650208	0.634893924	1.66768478	0.297386848	0.396861994	0.240329158	0.362467001	0.386474872	0.781486857	0.76254143	0.254804427	0.861917666	0.015145832	0.10549994	0.92540371	0.956231282	0.837218342	1.198935458	0.346864378	0.520945768	0.395006257	0.123166169	0.853818603	0.070407325	2.251563655	0.055275503	0.248456656	0.213704974	1.030654173	0.68180033	0.20594949	1.769960799	0.490263012	0.303633911	0.098465664	0.316349945	0.124346999	0.353866255	0.774758733	0.334492659	0.226219704	0.278203789	0.535753965
E07000134	2012	0.491261512	0.594942258	0.602555868	0.339876243	0.177436426	0.188153735	0.626017626	1.629509372	0.298373038	0.392093213	0.236658131	0.34938739	0.384050541	0.772513473	0.756960026	0.253480436	0.849449139	0.015039998	0.10476918	0.91245645	0.951482077	0.814064531	1.174417547	0.33451477	0.514118311	0.387919579	0.121745971	0.828578761	0.069551796	2.201350222	0.0559806	0.244127981	0.208177155	1.012971312	0.675565054	0.202425074	1.736805209	0.480025757	0.29741352	0.090616178	0.303289688	0.120975511	0.341695024	0.753463852	0.337305403	0.222154325	0.275728389	0.528687939
E07000135	2012	0.465243695	0.559049217	0.596271396	0.332600175	0.200974922	0.185692628	0.662508152	1.544100127	0.300479149	0.373931178	0.230670241	0.31376845	0.388198944	0.798648688	0.704376786	0.246323534	0.765068867	0.012696322	0.115107299	0.888183407	0.980812276	0.771087854	1.137564571	0.314394875	0.481451982	0.335276188	0.122468153	0.756201801	0.092595319	1.996864534	0.055203658	0.243815979	0.206754862	1.035100483	0.642264595	0.210574073	1.352694443	0.414099045	0.31323898	0.098383327	0.29801066	0.133742267	0.377548947	0.689072436	0.310632422	0.241036332	0.292856818	0.520674914
E07000136	2012	0.482564409	0.582626512	0.598093234	0.350469136	0.174107106	0.187073765	0.619059001	1.717569206	0.298751136	0.394087486	0.239631571	0.348632351	0.37458283	0.789559022	0.750187811	0.253225299	0.837177498	0.013920771	0.101726213	0.913601737	0.937983219	0.818577931	1.185667325	0.345111396	0.507986699	0.379572662	0.115083444	0.824771857	0.068318629	2.221072987	0.05649711	0.240769298	0.209369509	1.014426743	0.675189291	0.204748904	1.578557965	0.476621391	0.301422085	0.101554169	0.31128553	0.125416415	0.342570095	0.753611794	0.328322382	0.221930915	0.268743303	0.514531171
E07000137	2012	0.530887137	0.608744606	0.63992278	0.36269154	0.189444201	0.212008247	0.658927673	1.744313008	0.318117163	0.414799383	0.267566529	0.384736194	0.391776642	0.789294816	0.783592982	0.271162646	0.881529109	0.015111437	0.105366782	0.97609631	0.971654017	0.899941059	1.258964639	0.383343477	0.556246498	0.397433618	0.12951638	0.923535266	0.069357553	2.387509435	0.056940834	0.253158582	0.237519101	1.064017742	0.702310092	0.217083884	1.757626253	0.527135531	0.32262203	0.0826094	0.340913957	0.136156881	0.384677388	0.837154577	0.327508167	0.24026502	0.29533944	0.530386354
E07000138	2012	0.442225845	0.560740702	0.559533049	0.344805394	0.160697838	0.165281082	0.580530227	1.824296573	0.293071893	0.374319916	0.226221574	0.319009683	0.363546302	0.838580408	0.728320136	0.239714588	0.795302857	0.015015116	0.103965666	0.864857029	0.911740328	0.756059357	1.12616023	0.312462544	0.475090831	0.365148323	0.105499404	0.767865143	0.068182672	2.120416502	0.05575778	0.22524461	0.193512205	0.974224575	0.661590934	0.188593328	1.465951415	0.448913522	0.28472903	0.106945281	0.293461997	0.119424918	0.30174285	0.735837826	0.337328697	0.199088688	0.244055309	0.507149243
E07000139	2012	0.513567178	0.599822993	0.618574677	0.357203813	0.182262332	0.198541323	0.641941043	1.693714054	0.314869217	0.410210444	0.251282858	0.362016182	0.389311889	0.800907593	0.777545827	0.263284884	0.870960406	0.014823288	0.105327075	0.951032719	0.971384765	0.860746605	1.226505108	0.35672331	0.536232808	0.397391584	0.126496679	0.884874837	0.068030174	2.316107696	0.058279184	0.250246867	0.219651288	1.047885074	0.699882032	0.208754493	1.735216163	0.508351147	0.306934284	0.092017306	0.32107755	0.12720728	0.357454682	0.798362037	0.342843072	0.227546815	0.279876659	0.540872419
E07000140	2012	0.50576954	0.593161572	0.614138466	0.367302227	0.176573264	0.199585054	0.627683127	1.801353806	0.319812186	0.408400769	0.258096102	0.362967628	0.380115029	0.817900183	0.771851917	0.260970746	0.862968516	0.014530748	0.105498739	0.948344659	0.96591647	0.869553694	1.23285678	0.363083568	0.533104196	0.392312409	0.122516424	0.885667892	0.068240914	2.335876234	0.059746636	0.245262194	0.224889699	1.038149487	0.70396384	0.207350982	1.672663281	0.505460349	0.31057094	0.100158972	0.328660554	0.133013016	0.353670778	0.794590012	0.33887116	0.223555509	0.282456585	0.532279292
E07000141	2012	0.509018666	0.601999825	0.616289599	0.355163897	0.183258382	0.194759783	0.640960304	1.668003933	0.310691368	0.403836363	0.246769055	0.359096582	0.391936313	0.798095302	0.778479216	0.262825778	0.865897807	0.01547442	0.106221809	0.942949119	0.972355471	0.842018984	1.210159194	0.347762161	0.529770315	0.392108745	0.126533544	0.86588988	0.070079898	2.284618641	0.057559273	0.249663015	0.215867819	1.043661194	0.695641834	0.207421923	1.749212218	0.497150803	0.304592628	0.09644628	0.314802418	0.125383265	0.352924186	0.784556771	0.343847874	0.226634222	0.278701064	0.543048562
E07000142	2012	0.516244391	0.605488577	0.625998547	0.361610737	0.182819203	0.200331027	0.645575621	1.745793271	0.317188097	0.409045227	0.257103283	0.370618168	0.389294381	0.813847173	0.77985928	0.267544689	0.87391815	0.015417874	0.107175665	0.957888482	0.97431424	0.866728322	1.238452767	0.363069701	0.5396599	0.398736896	0.127378089	0.899414863	0.070298089	2.345681326	0.058879664	0.249765525	0.224576627	1.057232849	0.708106685	0.210045993	1.743255497	0.51336111	0.312195726	0.093390335	0.330065411	0.131070156	0.362643058	0.816754145	0.341725611	0.228968956	0.283957942	0.540332494
E07000143	2012	0.504844149	0.594256459	0.615813916	0.359145438	0.18112496	0.198217431	0.63709802	1.731493516	0.314029719	0.408151834	0.252314736	0.359521427	0.383837955	0.800840376	0.770992765	0.262184397	0.860159337	0.014498517	0.10428679	0.948503145	0.963428656	0.856113801	1.223304822	0.359355476	0.528967031	0.389227728	0.123093144	0.868904587	0.069853099	2.302465452	0.057941913	0.247884524	0.220292468	1.03750072	0.696067117	0.21041502	1.666724488	0.499975148	0.310636531	0.096128715	0.322574658	0.130283535	0.358170006	0.782070199	0.336159815	0.228024924	0.279668259	0.53237108
E07000144	2012	0.533170789	0.621101306	0.639633056	0.368777625	0.190766193	0.206712469	0.665571641	1.685806678	0.318439815	0.417700468	0.257442095	0.379390027	0.403772054	0.80275351	0.798114327	0.269567747	0.892731901	0.015518833	0.108385502	0.975706929	0.99354879	0.883847482	1.254259952	0.364444563	0.554155217	0.40360779	0.130986886	0.898113265	0.071784868	2.374075545	0.057539803	0.259489607	0.227983829	1.064837918	0.709897591	0.216403509	1.831755202	0.519001479	0.316161726	0.09644629	0.327661463	0.129610592	0.373206985	0.819111886	0.345883794	0.238575416	0.293829879	0.552428758
E07000145	2012	0.490218676	0.585331399	0.603345526	0.351497628	0.177263743	0.193561673	0.622734386	1.741154543	0.30723606	0.396162585	0.249343782	0.350199354	0.375983086	0.802098215	0.76117374	0.260622932	0.84173047	0.014429048	0.103558499	0.929318758	0.950693642	0.83692744	1.199707443	0.352882723	0.521911947	0.380188986	0.118465856	0.856238913	0.068734801	2.259920382	0.058306667	0.243421608	0.216919864	1.029986153	0.683279313	0.20648856	1.618250757	0.493444144	0.306398129	0.094160587	0.315560747	0.129692504	0.347254048	0.776790032	0.332084273	0.223542785	0.273056536	0.520049315
E07000146	2012	0.515051873	0.596957683	0.624102687	0.359232935	0.187435768	0.202671473	0.650492485	1.723019701	0.315982326	0.408455309	0.256266713	0.364461783	0.39054498	0.800019222	0.76939924	0.263401458	0.863122147	0.014864352	0.106833666	0.954959983	0.969621417	0.868048845	1.229213322	0.364851021	0.53768586	0.388732723	0.125097329	0.880950301	0.071785226	2.312673813	0.05780172	0.249198263	0.226563656	1.04438175	0.693847209	0.213067681	1.675798691	0.50358488	0.316709111	0.092367576	0.326701046	0.133260689	0.371304567	0.794694046	0.332575584	0.23466737	0.290404263	0.53320765
E07000147	2012	0.553108109	0.625078681	0.657702832	0.371007216	0.199116734	0.222683694	0.683285244	1.705690137	0.319372616	0.421184597	0.271445316	0.397166249	0.406082387	0.774238251	0.802916022	0.274616839	0.897714407	0.015647436	0.106488652	0.999085832	0.987167682	0.931410405	1.278782771	0.39310768	0.576504781	0.401209709	0.132425206	0.942041281	0.071285681	2.438058065	0.055482233	0.260436781	0.246354381	1.078429319	0.703619351	0.225041853	1.848909644	0.537386028	0.333041262	0.083292973	0.346858832	0.139157931	0.406274734	0.85025446	0.326686831	0.253341326	0.310586402	0.535443657
E07000148	2012	0.43259932	0.560122825	0.553926569	0.337492136	0.160026361	0.163322794	0.577119559	1.797372261	0.285860219	0.370147037	0.221539052	0.317511528	0.364357572	0.83267218	0.721379237	0.236717305	0.783871331	0.015680912	0.105649927	0.854633839	0.899197914	0.746622953	1.109973563	0.302497785	0.469574568	0.354414923	0.103384213	0.739744923	0.069710922	2.067713395	0.053684089	0.224326043	0.192186253	0.954658383	0.643891731	0.187990098	1.473232235	0.432754881	0.284662252	0.101878008	0.284505546	0.118391825	0.302471536	0.725178481	0.330498304	0.198917944	0.24812179	0.503748311
E07000149	2012	0.53279486	0.611286399	0.634888898	0.364776155	0.194494607	0.203759879	0.665401205	1.612591939	0.313160005	0.414217064	0.25075505	0.37300591	0.407398365	0.790126456	0.799514839	0.268877544	0.886346797	0.016163035	0.107368531	0.963365613	0.990450433	0.867232942	1.227900792	0.355039747	0.546623336	0.398707647	0.134772471	0.885513797	0.071275767	2.329285814	0.056705081	0.256911513	0.219728101	1.056787233	0.69496461	0.215380743	1.835436562	0.508270371	0.313545406	0.099486148	0.322592858	0.126750885	0.376224279	0.809998909	0.341920339	0.237650541	0.292080692	0.552496758
E07000150	2012	0.443817625	0.556147613	0.55810604	0.326257858	0.166508473	0.165413074	0.585305836	1.625775954	0.281564172	0.368398306	0.217464525	0.308570994	0.361670885	0.784130189	0.712566734	0.237728006	0.783611787	0.013577001	0.101234311	0.842712682	0.905874094	0.740844615	1.096410059	0.301736503	0.472004983	0.353321367	0.111229867	0.754472092	0.067392853	2.029332449	0.054054343	0.231805994	0.184923708	0.96434013	0.640104569	0.189184602	1.492175905	0.431692462	0.278744125	0.111260347	0.280275369	0.114198124	0.307027349	0.695041766	0.328454558	0.205251677	0.247908681	0.499802966
E07000151	2012	0.505388924	0.602976221	0.613312578	0.351702995	0.181243816	0.193754924	0.638247636	1.6455506	0.309955823	0.400184443	0.243679888	0.361593044	0.390819005	0.796887613	0.76889615	0.260798207	0.868192569	0.016209791	0.109772425	0.931421003	0.973096932	0.83669254	1.200515	0.342536669	0.52676483	0.396446206	0.131061136	0.86484627	0.070952876	2.255297069	0.05816713	0.247672949	0.213854044	1.04020534	0.691104835	0.203834716	1.832310597	0.490936441	0.304254465	0.095208289	0.316944427	0.124199307	0.353744718	0.789018714	0.342188343	0.222995598	0.283021842	0.549483673
E07000152	2012	0.494937511	0.593165852	0.605538862	0.346839404	0.180560856	0.188756007	0.631314247	1.613553599	0.304142785	0.394598733	0.237442733	0.349107798	0.386558733	0.787766558	0.761143209	0.257729874	0.850280791	0.015149273	0.106758719	0.917911924	0.963597092	0.810284243	1.179454211	0.333486023	0.510726623	0.385916066	0.125380724	0.831922365	0.072367478	2.199879062	0.056991039	0.245510037	0.206542045	1.026660334	0.680110809	0.203009374	1.743516508	0.479286811	0.299070407	0.100307858	0.305029093	0.122214816	0.347246703	0.754432752	0.339106669	0.222836011	0.278175627	0.53704229
E07000153	2012	0.476639109	0.576116937	0.583799254	0.339710081	0.171910969	0.17842737	0.611126096	1.611206898	0.295996936	0.386092616	0.227154161	0.33079257	0.37715376	0.783589062	0.747059946	0.247910474	0.831968407	0.01504454	0.103548168	0.88885894	0.937122166	0.786088467	1.15005971	0.319617447	0.496519259	0.37537277	0.11751498	0.806755785	0.067895705	2.148514937	0.056288199	0.236558839	0.198019034	1.00315334	0.666201066	0.196529354	1.651879059	0.46539957	0.289769556	0.103797679	0.296019205	0.117253816	0.325184284	0.736728536	0.342323573	0.212709856	0.266127703	0.5198821
E07000154	2012	0.431715907	0.551239273	0.548500348	0.323233807	0.166490396	0.162974275	0.579829763	1.602810568	0.278558016	0.359166479	0.216229395	0.29994571	0.359331381	0.780357543	0.683222987	0.234062921	0.761012792	0.014104484	0.1068303	0.833374432	0.902194587	0.720571766	1.082391798	0.295868035	0.460313756	0.346123341	0.104864775	0.726894648	0.069889649	1.968404704	0.055251118	0.226181412	0.181910727	0.961889876	0.627145843	0.188364217	1.452724583	0.41593218	0.282096164	0.104372176	0.273664349	0.116022038	0.30960318	0.664463324	0.320957386	0.204117212	0.252738109	0.503601023
E07000155	2012	0.515145946	0.6147122	0.62008387	0.347859306	0.185508095	0.195466017	0.647474848	1.572932242	0.302572901	0.40488574	0.238831682	0.366563711	0.400143046	0.771886672	0.786873227	0.260647297	0.882787933	0.016117423	0.107695937	0.937798087	0.983401917	0.836354071	1.195828806	0.340553157	0.530449733	0.407134318	0.132297164	0.862885846	0.070147603	2.272559468	0.05483481	0.253208528	0.209002343	1.047341529	0.691587266	0.205940601	1.899653308	0.496404279	0.303027769	0.097837753	0.310877473	0.119620563	0.358166722	0.78603583	0.347826634	0.228353806	0.282971881	0.554541615
E07000156	2012	0.465473561	0.571300714	0.577939916	0.335695758	0.172032753	0.179219072	0.609192124	1.663850396	0.29830577	0.380354423	0.235122295	0.32847561	0.368446961	0.79950095	0.722309001	0.25080864	0.804929182	0.014413569	0.104859131	0.88743046	0.929764425	0.782883029	1.14827896	0.327007209	0.489604639	0.368524662	0.11308856	0.800016424	0.072273479	2.118283236	0.057236861	0.236040215	0.202811871	1.001496661	0.665539183	0.197917621	1.536357303	0.450849953	0.294692058	0.100261413	0.298717763	0.124713586	0.334450712	0.72241642	0.324710434	0.215075785	0.265294851	0.515600926
E07000163	2012	0.517502746	0.603839574	0.621274718	0.350050191	0.185197413	0.203726715	0.647870356	1.611784168	0.305919491	0.403442643	0.251076628	0.370873839	0.391072864	0.762718934	0.774260293	0.260662195	0.861394318	0.015492391	0.103872562	0.948413389	0.959011162	0.864343125	1.21214004	0.357849757	0.537871518	0.391214156	0.128205532	0.877600335	0.069768839	2.296162987	0.054445557	0.251582971	0.224299945	1.034735106	0.681283782	0.211623816	1.780446827	0.504452735	0.30872933	0.08333606	0.321498294	0.128247283	0.369319214	0.785832078	0.327780664	0.235326822	0.284944453	0.529442869
E07000164	2012	0.510025629	0.595212385	0.612826734	0.349423079	0.182819405	0.199429889	0.638522992	1.634608676	0.305817158	0.400292126	0.24796668	0.366467302	0.386839432	0.769454904	0.763045091	0.259873055	0.854021026	0.015028208	0.10398485	0.939696867	0.950397415	0.849323322	1.206222096	0.353447758	0.531309108	0.387570622	0.126723923	0.869100784	0.068826743	2.273304918	0.055913853	0.248376583	0.220353127	1.022099698	0.681672739	0.207858341	1.765814162	0.498157862	0.305945638	0.089386032	0.31751218	0.126509663	0.363772344	0.778529862	0.328513867	0.229396004	0.281791021	0.530987651
E07000165	2012	0.496915427	0.587774272	0.600595004	0.344222197	0.17996673	0.192318291	0.625776159	1.611012764	0.301474237	0.396552131	0.239764258	0.351119374	0.38505034	0.766846362	0.756739636	0.253172472	0.843152382	0.015019563	0.103356985	0.920210823	0.949910158	0.825554497	1.180734055	0.336161332	0.518526949	0.384293729	0.123847448	0.838289984	0.069109951	2.220757832	0.054740645	0.245273011	0.211764407	1.017951245	0.672309656	0.203611252	1.722890073	0.480830545	0.298994928	0.091596334	0.307344927	0.12272572	0.344971855	0.757180962	0.335532728	0.222972217	0.275732087	0.530474303
E07000166	2012	0.476565604	0.573185594	0.587803787	0.332140741	0.172517711	0.187255099	0.613935759	1.604710572	0.294948577	0.385717607	0.23475128	0.343848614	0.372753989	0.765594474	0.735286119	0.249821229	0.816594148	0.014432484	0.100595683	0.899233103	0.929222123	0.803044517	1.159399616	0.334476468	0.498898963	0.373018561	0.12096734	0.821329152	0.069469469	2.154243686	0.053862204	0.242594361	0.203914056	0.987630818	0.658463315	0.201041371	1.646985403	0.468650661	0.292874271	0.093058413	0.30485166	0.121303687	0.345052984	0.726814625	0.321171171	0.220755135	0.265251212	0.508644467
E07000167	2012	0.511919724	0.594472891	0.619270146	0.349366717	0.183013918	0.202007756	0.641589055	1.661023654	0.307365098	0.40534673	0.253546465	0.372115045	0.386229282	0.772226596	0.766277696	0.261905879	0.856094346	0.014810388	0.103826742	0.949708523	0.946732221	0.866135104	1.221415069	0.362274793	0.538870272	0.386312312	0.125957671	0.881634278	0.069702099	2.310290193	0.05508211	0.248525324	0.225932928	1.027736498	0.681723024	0.211476804	1.741426834	0.502838248	0.309316564	0.081623355	0.324837692	0.13038538	0.365497622	0.794766629	0.322759372	0.232375371	0.281861568	0.524210841
E07000168	2012	0.501023129	0.587942146	0.608389903	0.350572264	0.18040078	0.197202111	0.628947666	1.698118566	0.303626767	0.395473772	0.250384827	0.364826427	0.379114881	0.773783966	0.755971773	0.257909794	0.842022286	0.01491996	0.102249138	0.930664326	0.940359009	0.844676781	1.192927715	0.355956454	0.528678014	0.381021965	0.122526699	0.859655384	0.068643361	2.26665568	0.054929591	0.242491336	0.222718297	1.01829321	0.673688802	0.206585053	1.672052149	0.498400885	0.306041175	0.08389858	0.320178841	0.129912998	0.35937195	0.801362929	0.320417339	0.228446907	0.278188009	0.51277634
E07000169	2012	0.492684277	0.591082266	0.597957312	0.344903163	0.175019392	0.187811542	0.619555281	1.617021593	0.297446376	0.389757558	0.233614553	0.351274727	0.381863413	0.769982657	0.755286371	0.251634966	0.852216617	0.015298741	0.105602475	0.907994881	0.946682798	0.808564963	1.167061523	0.331000337	0.511212345	0.389981737	0.124240831	0.837309353	0.068247247	2.209178827	0.05479925	0.241171985	0.206682227	1.012298937	0.675136546	0.198194126	1.792870919	0.48698978	0.293484055	0.096590552	0.303090705	0.118801489	0.337647408	0.762700181	0.340557821	0.217933683	0.275016966	0.531295931
E07000170	2012	0.472404037	0.574204894	0.587563789	0.349781452	0.165382504	0.180331441	0.603193482	1.801710226	0.30775969	0.395663372	0.241925205	0.338668444	0.365529409	0.830080492	0.755918997	0.254089253	0.833884076	0.014342382	0.102370372	0.908771004	0.93681728	0.814808743	1.188856474	0.339332464	0.503180503	0.382944666	0.114873211	0.837670427	0.066783732	2.240410608	0.059021412	0.237667824	0.206827969	1.01012257	0.691191856	0.199136085	1.559765545	0.478511671	0.294938128	0.102587451	0.313068033	0.125097707	0.323814575	0.760749791	0.341311246	0.209970088	0.256620672	0.520188029
E07000171	2012	0.501323718	0.594827111	0.611399772	0.357687745	0.177969348	0.191932195	0.631458116	1.713429971	0.309622502	0.401551297	0.246128193	0.356183371	0.384762839	0.81503279	0.773432469	0.259777225	0.856876638	0.014921595	0.105833573	0.932947559	0.96649729	0.836938496	1.205024972	0.346685412	0.52568795	0.388725547	0.125659671	0.864331407	0.069872346	2.27313397	0.05801342	0.246961567	0.215110318	1.044858943	0.695142318	0.205192129	1.705624059	0.497317947	0.302198024	0.10362522	0.317280172	0.12597945	0.348291409	0.79360107	0.341994979	0.223129005	0.274840764	0.534076205
E07000172	2012	0.492076313	0.585347746	0.600638084	0.341643812	0.182276112	0.18560165	0.632721337	1.601598765	0.298864774	0.391044379	0.238264868	0.343629089	0.391068512	0.781754728	0.750585341	0.252389346	0.839995939	0.015521888	0.105536511	0.904480136	0.950444837	0.810991242	1.171998821	0.325272419	0.517999815	0.374473095	0.127716449	0.812500314	0.070253486	2.190760924	0.055829347	0.244220303	0.2045768	1.002539685	0.664729608	0.203934198	1.68172388	0.473459303	0.297141867	0.085683589	0.301083926	0.119812594	0.345882181	0.770393384	0.337052728	0.224403808	0.270215927	0.531715135
E07000173	2012	0.489729293	0.59536917	0.597221978	0.351799101	0.179973102	0.185874752	0.625450467	1.666471104	0.300837662	0.392897232	0.244078484	0.343064562	0.384318187	0.807825199	0.753523535	0.257263679	0.829799023	0.016330098	0.107054136	0.916300104	0.955536233	0.817017374	1.182034606	0.331714114	0.518081456	0.374304205	0.122645589	0.827589086	0.070283004	2.222281885	0.057397219	0.246692436	0.207457774	1.034168146	0.673746567	0.204179311	1.684994775	0.473223641	0.298796154	0.101835958	0.302477489	0.125044222	0.345837014	0.774193396	0.335117519	0.221583669	0.267728971	0.533765362
E07000174	2012	0.469293212	0.577866842	0.588455674	0.355509953	0.167277221	0.180718663	0.604258222	1.834813909	0.307673841	0.39743218	0.243947629	0.338014615	0.366621382	0.844638603	0.749494944	0.255400313	0.83064854	0.014154939	0.10424059	0.913744475	0.942559941	0.812768299	1.191635888	0.3421835	0.50420638	0.380558271	0.112190973	0.833527105	0.066733155	2.244275134	0.058652119	0.23742581	0.206911754	1.018856401	0.693094884	0.199916781	1.519761821	0.480147849	0.299047798	0.105244879	0.313405764	0.12734864	0.325266036	0.763051919	0.338151778	0.211069741	0.257623156	0.521912664
E07000175	2012	0.496759067	0.593667534	0.608288437	0.357713456	0.176077214	0.191232227	0.62921665	1.715022923	0.311298185	0.400849547	0.246656808	0.356868502	0.37987487	0.810067846	0.76990086	0.262151875	0.853615258	0.015017906	0.105224442	0.933745599	0.958488531	0.837156501	1.210605826	0.347931436	0.520990443	0.390325303	0.120598392	0.863822108	0.069159535	2.272531252	0.057690529	0.245751257	0.215430929	1.029075613	0.694197743	0.205246433	1.69142544	0.494191726	0.30188336	0.101151766	0.316352062	0.126443187	0.346355144	0.778277005	0.33930442	0.22132422	0.275170312	0.532002755
E07000176	2012	0.5037245	0.595219557	0.607480325	0.346635327	0.184369266	0.193948929	0.640145258	1.565442785	0.304787819	0.397763125	0.239230455	0.357369169	0.393452193	0.781983032	0.763743909	0.257240376	0.853324368	0.016496989	0.110947261	0.926384488	0.967388934	0.825511327	1.184352498	0.334952669	0.522918037	0.390338603	0.128121661	0.846512342	0.071680903	2.216331131	0.057211788	0.246450428	0.210716392	1.023628029	0.674329903	0.203803023	1.799831849	0.478906306	0.302381878	0.094658987	0.309484943	0.122675252	0.356816513	0.782632173	0.337390416	0.223351654	0.283069299	0.550294558
E07000177	2012	0.496576659	0.59873302	0.605434417	0.35025252	0.186199582	0.186071736	0.642056423	1.558141805	0.297889353	0.395560295	0.229900768	0.341467929	0.404878611	0.792738759	0.763794518	0.255494429	0.850390039	0.016971216	0.112797723	0.911530962	0.978967026	0.796898467	1.168692665	0.318442608	0.514375658	0.382826676	0.129203433	0.82140312	0.072925004	2.170358516	0.05634985	0.249312581	0.1984213	1.033508029	0.66994122	0.203957597	1.792881698	0.465058105	0.299474654	0.113341124	0.297423543	0.117776968	0.347919227	0.742218772	0.347160341	0.225011101	0.278652328	0.553291059
E07000178	2012	0.423817558	0.548774786	0.545903419	0.329632825	0.176254234	0.155997424	0.587563508	1.661211754	0.282406333	0.353337796	0.206763896	0.2885115	0.380404005	0.843002542	0.700445581	0.233653256	0.755846355	0.01631759	0.112822617	0.824023311	0.914883243	0.699175988	1.073671051	0.276851946	0.454975938	0.336918029	0.105727057	0.697239064	0.078006755	1.9102098	0.054325965	0.224298912	0.179401068	0.971595439	0.622236299	0.185430565	1.418493841	0.398929115	0.288438602	0.109021131	0.27123432	0.114487466	0.307785907	0.670703088	0.332996474	0.199517492	0.252020003	0.519244704
E07000179	2012	0.520354059	0.607805797	0.62567011	0.357774117	0.193474213	0.198563604	0.662272627	1.554138106	0.312560521	0.40886506	0.241350983	0.364368813	0.414902603	0.798465622	0.780999095	0.264603054	0.875500514	0.01728223	0.115889545	0.947693945	1.001931158	0.841191264	1.209909557	0.337586483	0.536815898	0.39577094	0.136784793	0.873494534	0.072701956	2.253606086	0.058205065	0.254716613	0.211408323	1.055441151	0.686267851	0.210532414	1.871134407	0.48935685	0.311424715	0.102103583	0.313311035	0.123661566	0.373644904	0.778488199	0.34845781	0.232851589	0.293173685	0.57083645
E07000180	2012	0.509097528	0.608509614	0.618652459	0.358856082	0.188479045	0.193988705	0.651241583	1.599644205	0.310477132	0.404428977	0.244476637	0.35793812	0.403112775	0.808825665	0.776891254	0.261674745	0.861460266	0.01655039	0.113144461	0.940195105	0.992062819	0.832673821	1.204572759	0.337215452	0.533099498	0.390764505	0.132140891	0.856975717	0.073625182	2.250959244	0.058306796	0.254456976	0.210683426	1.046077316	0.6841318	0.209188743	1.805245406	0.488634329	0.307812515	0.104046399	0.31036831	0.12444918	0.364783197	0.793674174	0.34388452	0.228761497	0.284889012	0.558004677
E07000181	2012	0.522663082	0.618973846	0.628801601	0.359471009	0.189876836	0.19902356	0.658548092	1.604570346	0.312160661	0.411621073	0.243730225	0.369537979	0.409520233	0.795962611	0.797370842	0.264104685	0.88779671	0.016801636	0.112240973	0.952061901	0.999220042	0.850054292	1.214361163	0.339941249	0.542836394	0.401577654	0.135017606	0.865161519	0.072540631	2.292392292	0.05616873	0.256191076	0.213941658	1.054135419	0.694169185	0.210104032	1.901441135	0.502140886	0.308282824	0.102583224	0.314753981	0.122358631	0.361705119	0.798842569	0.353901093	0.231724092	0.290286353	0.561901077
E07000187	2012	0.508020013	0.604269431	0.615833507	0.356882183	0.182775883	0.196435921	0.639604945	1.672583214	0.311008647	0.405961194	0.247424359	0.365940689	0.390271377	0.795302261	0.777324247	0.262387211	0.863617304	0.015783732	0.105594819	0.946396998	0.965519232	0.848486755	1.210224198	0.350921172	0.530003544	0.394119039	0.125938435	0.868898616	0.070394977	2.287408769	0.05645182	0.248414397	0.218542839	1.04003263	0.691189742	0.207567086	1.776539524	0.496180534	0.306770122	0.096850597	0.319406367	0.127665614	0.354466041	0.793188006	0.337087198	0.226275911	0.281128224	0.540312903
E07000188	2012	0.495945699	0.586593089	0.604754037	0.349939476	0.178591078	0.193091406	0.630022783	1.682883976	0.308621371	0.399201534	0.248739793	0.355105109	0.379501351	0.794599011	0.756530255	0.258153562	0.842395698	0.014767088	0.103666903	0.930861596	0.945860832	0.839401084	1.201134478	0.348807555	0.523204223	0.382247205	0.122006383	0.855937828	0.069076121	2.265208961	0.056563107	0.244164024	0.216154026	1.021931793	0.68271693	0.20647327	1.653538574	0.488244348	0.304089165	0.091538931	0.31723599	0.127269277	0.352389268	0.78434307	0.328035183	0.224340302	0.272641337	0.524777604
E07000189	2012	0.507044159	0.592412716	0.611041439	0.357423211	0.181691332	0.198236518	0.635264125	1.671613275	0.310014036	0.404039145	0.250431944	0.363490042	0.38479484	0.784718588	0.765602146	0.260057218	0.856014249	0.014966229	0.104371725	0.941820657	0.957799517	0.851658471	1.210090403	0.353410377	0.531651135	0.387845503	0.124557437	0.869124845	0.069319939	2.287609325	0.05623028	0.246518269	0.220718385	1.029581854	0.685304553	0.208287091	1.713071088	0.498885278	0.30645112	0.093750987	0.319195902	0.127965325	0.358713348	0.789377057	0.332361281	0.227278922	0.280252084	0.530232927
E07000190	2012	0.504862695	0.591260682	0.607694993	0.353724403	0.180216896	0.192354943	0.631547625	1.646667787	0.304829461	0.404789453	0.243222257	0.351690088	0.387902075	0.784097649	0.773500147	0.257017984	0.858840252	0.015083363	0.10273343	0.931279571	0.959304041	0.83918298	1.197191802	0.340570951	0.529847646	0.386333716	0.125471844	0.850821175	0.067139993	2.276816165	0.055265658	0.246770592	0.212266775	1.029186511	0.681171956	0.206694513	1.724111306	0.492604299	0.299382129	0.097058518	0.30944337	0.122602111	0.347363328	0.781369874	0.341923639	0.224353209	0.271411214	0.530093449
E07000191	2012	0.543331213	0.608520916	0.650253531	0.37321195	0.194766159	0.22202311	0.668217974	1.740538231	0.323903236	0.422269122	0.277636598	0.397448029	0.39804526	0.783326117	0.785092266	0.2734876	0.883183445	0.015868585	0.105595544	1.004331468	0.976591152	0.926432864	1.285866163	0.397349585	0.573548508	0.3968196	0.131121162	0.952650035	0.069333689	2.44705204	0.055566409	0.256299101	0.248787929	1.074151269	0.704113469	0.224649456	1.759717416	0.535575531	0.33094993	0.07987339	0.347432573	0.141625928	0.396212479	0.84607727	0.319422285	0.247388363	0.299904586	0.536934406
E07000192	2012	0.478736077	0.592636634	0.597400229	0.36006194	0.168433918	0.185610494	0.612207506	1.839716122	0.316086315	0.400783994	0.24677548	0.347988183	0.373206256	0.853921731	0.769613955	0.259786586	0.85439703	0.014007951	0.105019481	0.931083138	0.965780654	0.828897817	1.215679008	0.347176056	0.513440664	0.396994776	0.1136488	0.856174157	0.068496282	2.273940948	0.061234759	0.241703058	0.211672642	1.037279237	0.710783222	0.201692838	1.598981746	0.494792323	0.300890589	0.105185583	0.316906464	0.128490197	0.328008408	0.755746499	0.352110904	0.21159897	0.265042509	0.538966614
E07000193	2012	0.472517621	0.577733509	0.589079736	0.333741949	0.180080973	0.183495339	0.624496721	1.586619739	0.292620748	0.379707046	0.227775979	0.332882042	0.382709991	0.77657809	0.731004884	0.246464759	0.810109018	0.014379356	0.106697872	0.8881266	0.941441411	0.782952557	1.145339931	0.321272643	0.49800794	0.36742831	0.12059723	0.786877162	0.075051765	2.094511494	0.054808747	0.242310121	0.200867358	0.999792154	0.654116532	0.201522584	1.612490054	0.454974168	0.297172215	0.096861945	0.296509667	0.12073197	0.346438464	0.71754175	0.325880847	0.222675642	0.272390819	0.521040024
E07000194	2012	0.518186625	0.60775909	0.626025916	0.356075422	0.190082581	0.199970594	0.656736246	1.62181225	0.311069338	0.404181364	0.246371068	0.365268783	0.403061673	0.794084278	0.783423304	0.264667072	0.872063931	0.015703089	0.109577122	0.943723593	0.983516813	0.849946031	1.216134629	0.34948189	0.535098409	0.396041116	0.132645046	0.874492418	0.072939028	2.270965729	0.05694061	0.254102991	0.21841452	1.049647059	0.690305301	0.209849225	1.835805354	0.498162284	0.309238633	0.097855951	0.319557849	0.125171435	0.368544236	0.795317815	0.34293823	0.233583969	0.292424638	0.551350791
E07000195	2012	0.488525161	0.586749507	0.602238224	0.359377147	0.176120216	0.188188165	0.626746303	1.810593426	0.315167814	0.402753084	0.248739099	0.350155609	0.378752664	0.847261677	0.769588	0.261664552	0.84652657	0.014614189	0.10516156	0.9367372	0.962667704	0.83336339	1.215913268	0.346884366	0.519004762	0.385808784	0.117681784	0.856643156	0.071200612	2.277580305	0.059176326	0.241745269	0.21632822	1.034123354	0.699100012	0.205721165	1.60709568	0.490845388	0.304746519	0.099574499	0.315547604	0.129707227	0.341936264	0.774104681	0.344786621	0.219268324	0.271183111	0.533307205
E07000196	2012	0.523896999	0.61428659	0.633741185	0.353543799	0.189567553	0.205030888	0.660544168	1.659979921	0.312845331	0.407596372	0.252740638	0.374150783	0.400860246	0.798545105	0.789395152	0.26740256	0.884615846	0.015756402	0.10888427	0.960280983	0.981580165	0.867677736	1.23502689	0.358405619	0.546702606	0.402925295	0.132206602	0.891593976	0.071610417	2.327079816	0.056908493	0.255734965	0.224474287	1.056375084	0.701019776	0.211647858	1.853787073	0.514533013	0.313779984	0.083159519	0.325669892	0.127755342	0.371143002	0.808162825	0.345210848	0.235893156	0.292729925	0.547888084
E07000197	2012	0.510849912	0.607405923	0.618390252	0.357340538	0.18422262	0.195679656	0.644559263	1.680262502	0.310261854	0.404759196	0.246167458	0.364955853	0.397648753	0.805525987	0.784225432	0.263080883	0.869786714	0.015943471	0.108677544	0.945834087	0.975463643	0.843865851	1.212778283	0.34673493	0.531927536	0.393444273	0.128254879	0.867872049	0.070937889	2.289207433	0.056510578	0.251435103	0.216258191	1.041029551	0.694323898	0.207822029	1.803466108	0.50189446	0.305582792	0.098504293	0.315581395	0.124868244	0.356707955	0.799126254	0.347026889	0.227877371	0.281862162	0.545909784
E07000198	2012	0.523262873	0.616445296	0.634066979	0.367475576	0.185742344	0.203315231	0.655409294	1.785712288	0.324798706	0.418427925	0.262259921	0.375330478	0.395606235	0.826767711	0.787564605	0.27017872	0.888648635	0.015158792	0.108149419	0.97851337	0.986423186	0.882807205	1.263113251	0.371169054	0.546773975	0.405128831	0.128160973	0.910851548	0.071124279	2.381461155	0.060528433	0.253550683	0.229867085	1.068440421	0.720221147	0.214007764	1.758011693	0.520150962	0.317577887	0.089301111	0.332765069	0.133956189	0.366438364	0.817675903	0.346953106	0.232404236	0.288975903	0.552417133
E07000199	2012	0.465629117	0.575241589	0.584450419	0.347585909	0.168130878	0.178349638	0.606655711	1.772755014	0.310485938	0.39358627	0.239793995	0.331081456	0.36723365	0.839877	0.747633217	0.255340498	0.828669008	0.014096033	0.105063712	0.906667295	0.948781615	0.796970568	1.184029961	0.333337168	0.494130886	0.37999452	0.111604366	0.822455715	0.070214358	2.183831342	0.060165766	0.236668813	0.203082272	1.014036068	0.690104221	0.198912307	1.511712823	0.467737284	0.296096348	0.103558106	0.305461252	0.125508818	0.322314276	0.724262979	0.341520885	0.209596557	0.260305341	0.52737917
E07000200	2012	0.526106044	0.616085874	0.635607223	0.363030234	0.1894728	0.206921314	0.660808822	1.678273488	0.317159224	0.413479017	0.255654466	0.3789612	0.400301771	0.796185761	0.790298866	0.268960137	0.887804062	0.015854039	0.107508341	0.969844467	0.992245009	0.875017922	1.243123606	0.363979527	0.54733635	0.403157492	0.130779943	0.898141308	0.07179949	2.346569244	0.058302595	0.255983985	0.227459295	1.06492663	0.705576192	0.214257253	1.825297227	0.514969053	0.316001153	0.091920198	0.32860834	0.131282118	0.374643944	0.809779471	0.342069679	0.236449402	0.292961535	0.551288507
E07000201	2012	0.46042904	0.569711301	0.57883214	0.34201917	0.166440504	0.177700332	0.599204997	1.710074934	0.29886007	0.391116992	0.230967598	0.324309657	0.368260434	0.801441261	0.740460104	0.253980135	0.819465852	0.014656487	0.104176379	0.899568262	0.925954909	0.787066623	1.16739479	0.329821361	0.495923722	0.371613468	0.110410101	0.80109319	0.066634049	2.162460133	0.055608544	0.238613094	0.19630444	0.986602575	0.671311832	0.200029379	1.541056642	0.464207839	0.294949282	0.101517138	0.301414124	0.117849619	0.323433567	0.7060044	0.342234102	0.213663458	0.255496301	0.519234502
E07000202	2012	0.441878246	0.559007249	0.562068598	0.339014533	0.166854119	0.16896157	0.589280608	1.721260545	0.29049059	0.37196106	0.226074682	0.31332789	0.360328916	0.81847272	0.711129017	0.241675343	0.779270948	0.014060079	0.106980192	0.863876186	0.920774485	0.752649115	1.119285808	0.309805832	0.473568791	0.35470782	0.10556678	0.750675884	0.072209485	2.055518438	0.057061117	0.230010896	0.192895867	0.976642718	0.650133609	0.193421619	1.449229913	0.431041837	0.290330985	0.111546935	0.287763671	0.122403736	0.31593554	0.697433907	0.326617743	0.206738225	0.256354203	0.510533104
E07000203	2012	0.519378958	0.607177206	0.625385868	0.359171031	0.185248742	0.201263663	0.64924587	1.675295588	0.315609432	0.412295681	0.252054586	0.364164971	0.393416745	0.791954825	0.784300394	0.26519593	0.881686957	0.014513471	0.104314405	0.956516127	0.980658071	0.86724371	1.235368564	0.358163452	0.539256656	0.398473987	0.129152121	0.886142901	0.069269911	2.327761247	0.057377191	0.253521489	0.220347718	1.052124584	0.700417069	0.211778272	1.773691445	0.510093994	0.309639553	0.093021904	0.322402453	0.127611089	0.359920137	0.787982909	0.344885877	0.231696093	0.285479243	0.540971447
E07000204	2012	0.501082119	0.592395996	0.610214819	0.355905253	0.184117415	0.190517181	0.640427375	1.637613093	0.305028182	0.401649742	0.240067079	0.348644489	0.394159702	0.795213109	0.772320841	0.257145072	0.853612239	0.014984845	0.105852356	0.927539622	0.96466228	0.827588034	1.193030306	0.339124637	0.521326706	0.384363237	0.126043873	0.840252037	0.070928526	2.234328463	0.056262029	0.248172152	0.208193389	1.033911497	0.679332242	0.207511222	1.690411221	0.484901746	0.301985945	0.106942663	0.309941046	0.123048056	0.353973721	0.766737759	0.34090013	0.226515376	0.275923373	0.535115009
E07000205	2012	0.537291931	0.616183247	0.639255944	0.365931267	0.196277218	0.212145779	0.669346637	1.627579934	0.31547098	0.413238697	0.257142606	0.383286044	0.406305141	0.782354323	0.793320969	0.268393996	0.884213482	0.016057882	0.10977847	0.971542104	1.001129624	0.886478362	1.237669754	0.365318423	0.557071329	0.401111258	0.135331718	0.901597759	0.073821453	2.341853228	0.056841389	0.257970302	0.230596162	1.074422921	0.697363053	0.216712155	1.869581476	0.514150481	0.31950583	0.094727901	0.330840494	0.13196711	0.387118867	0.824041099	0.337362235	0.242593391	0.302827278	0.553323082
E07000206	2012	0.516126588	0.594330263	0.619928907	0.372943637	0.182124958	0.203194718	0.637957602	1.764675424	0.320792771	0.413143064	0.26067393	0.367275305	0.383325629	0.809260587	0.777265784	0.267388456	0.868906451	0.015030057	0.10413238	0.965001614	0.973401508	0.878729293	1.241148801	0.368920312	0.545461571	0.390805407	0.123040675	0.89481174	0.066857882	2.361159864	0.058662141	0.247413115	0.226951022	1.04930023	0.703209615	0.212692848	1.686801652	0.511700073	0.313226322	0.09876442	0.330630421	0.132857322	0.362047759	0.812666899	0.33877868	0.229244645	0.283457176	0.536678804
E07000207	2012	0.509889061	0.59479147	0.611875729	0.342002607	0.200727037	0.190721657	0.662155721	1.400271622	0.306171779	0.401812869	0.228702581	0.356787472	0.41738655	0.791210628	0.746094029	0.258156516	0.839718116	0.018464189	0.119493389	0.922858087	0.996916454	0.809225768	1.169274277	0.316823171	0.515725636	0.387425445	0.131350667	0.818875936	0.078046347	2.110642375	0.058817856	0.255024707	0.202291809	1.025276113	0.658029472	0.211065628	1.779760954	0.453358208	0.311416252	0.10368064	0.298267864	0.121993395	0.379042791	0.740544791	0.329747745	0.233605315	0.290646822	0.578671115
E07000208	2012	0.505378958	0.594201267	0.608178273	0.346384827	0.206291462	0.18876661	0.666716639	1.475366928	0.307420781	0.391352227	0.229445003	0.346606831	0.419124704	0.806486986	0.747739207	0.25785087	0.823864696	0.017952778	0.120355892	0.910805738	0.995268554	0.789995172	1.156254288	0.312977712	0.508258355	0.372345241	0.132942043	0.80615084	0.083616932	2.095081757	0.059182194	0.251159776	0.204708977	1.040941754	0.653791096	0.208238058	1.729933455	0.445589973	0.308773754	0.106338988	0.294942841	0.123093469	0.380032641	0.756736145	0.329161896	0.230313911	0.293924277	0.56834544
E07000209	2012	0.497533217	0.595634981	0.603963301	0.352154296	0.18794783	0.185891281	0.640073617	1.607987532	0.308574014	0.395690241	0.2341451	0.349491226	0.406660678	0.832727487	0.763927152	0.256764152	0.843173964	0.018932726	0.117959979	0.918007579	0.978166115	0.803578755	1.173402476	0.319909596	0.509759769	0.384343202	0.126891439	0.824000871	0.075392564	2.177917027	0.059109611	0.245177989	0.205378773	1.020380395	0.669680596	0.201569185	1.78395302	0.466242631	0.302038939	0.108800477	0.298965965	0.121493761	0.352461423	0.781620467	0.343461314	0.218989835	0.280775527	0.568226433
E07000210	2012	0.53090171	0.617746529	0.637521248	0.362225608	0.200818163	0.205978266	0.680474464	1.52886297	0.315319802	0.411980906	0.249017518	0.376947541	0.419357019	0.799266926	0.794379606	0.268604709	0.882292295	0.018251076	0.116662941	0.964043439	1.014238217	0.858543831	1.220259794	0.345187676	0.550765423	0.399137066	0.140410003	0.884409602	0.077183609	2.295100828	0.058070787	0.257775624	0.221032376	1.070831398	0.684525169	0.214792804	1.927214083	0.497978251	0.316557041	0.100540002	0.320179087	0.12840672	0.389338094	0.812803546	0.341805362	0.240684202	0.300585172	0.575000629
E07000211	2012	0.508526253	0.606291215	0.614769584	0.355571572	0.192647779	0.190695063	0.65310228	1.548453177	0.30720521	0.400235346	0.233527861	0.359135025	0.412490794	0.810668265	0.774325223	0.25987697	0.858492106	0.019036115	0.117817277	0.929564969	0.994933794	0.816415653	1.178754866	0.323900302	0.5222832	0.393361799	0.130940083	0.832375583	0.076591208	2.190771555	0.058592341	0.250965307	0.20834744	1.035105664	0.675338615	0.204871406	1.858325872	0.470465258	0.305855243	0.113529248	0.30181903	0.12117992	0.362766697	0.790482068	0.34540684	0.224941321	0.289719224	0.573803345
E07000212	2012	0.49237824	0.599187202	0.602681597	0.346757685	0.19571093	0.185921702	0.645504157	1.55405045	0.296285232	0.386203938	0.230017284	0.341794836	0.408410738	0.803883693	0.74710401	0.250321111	0.828784174	0.017588807	0.117073878	0.902077005	0.975107443	0.793664822	1.153216195	0.314175175	0.511883187	0.37373463	0.126832654	0.80353402	0.078258443	2.119394807	0.056038558	0.247756913	0.204689877	1.027561078	0.652014689	0.204438177	1.732355383	0.457511914	0.30448532	0.106112912	0.294582958	0.122114565	0.359335944	0.759872156	0.333287468	0.226034005	0.286603263	0.553386023
E07000213	2012	0.50327095	0.609632668	0.606265427	0.339709357	0.204311828	0.187119635	0.658676479	1.456657737	0.289732113	0.380847286	0.225715166	0.340974187	0.418688639	0.782425699	0.755003181	0.250880354	0.825278166	0.017975851	0.117972153	0.893384507	0.98849541	0.781087931	1.142228173	0.303683037	0.523509872	0.367344407	0.137738838	0.79991046	0.079386858	2.095405467	0.055245522	0.249789587	0.198105418	1.030505743	0.638910693	0.204698819	1.809529444	0.453598478	0.301880651	0.103403635	0.290346732	0.116661908	0.362984957	0.761222596	0.331834786	0.231057752	0.292620386	0.56132525
E07000214	2012	0.517303084	0.608125974	0.622853386	0.361468217	0.191019829	0.193983279	0.658594465	1.590589371	0.318503718	0.411279286	0.241919695	0.362011113	0.410454897	0.824944558	0.786023425	0.264594945	0.871205329	0.018063843	0.119142241	0.951197783	0.996228815	0.83362467	1.208784566	0.331777579	0.530685702	0.396915966	0.135579301	0.860163787	0.075660968	2.254283091	0.061018101	0.254845092	0.212195274	1.046512842	0.694487903	0.206922508	1.873763833	0.484907793	0.306744537	0.11035391	0.309517077	0.122857633	0.36397324	0.801269754	0.348951182	0.226202514	0.283944447	0.578272168
E07000215	2012	0.524417132	0.620628909	0.631302945	0.365611901	0.191659623	0.20277991	0.661329532	1.636077523	0.318356557	0.410820492	0.250013469	0.373521664	0.408307803	0.814040429	0.795316992	0.266275549	0.884025286	0.016641143	0.114300588	0.966733899	1.012037761	0.8571252	1.228649536	0.349847697	0.542431502	0.407588323	0.131449941	0.876733915	0.074820268	2.298482451	0.05939383	0.257231824	0.222166507	1.068026541	0.706288039	0.211561537	1.865338687	0.501361535	0.31315509	0.107705564	0.319066448	0.12877494	0.370576456	0.803021912	0.350399073	0.231787946	0.296856988	0.574546538
E07000216	2012	0.534523254	0.615081027	0.634727293	0.36485552	0.199324794	0.20291266	0.673211219	1.516129994	0.317799401	0.417214003	0.244751884	0.377745663	0.418210543	0.802690947	0.792416128	0.268373837	0.880224908	0.018643046	0.116910241	0.961848364	1.009871634	0.856950741	1.21679266	0.341513021	0.542889664	0.402531464	0.138533073	0.868583253	0.075886588	2.278010657	0.05839898	0.256777891	0.217416478	1.05497509	0.68394815	0.21317729	1.920959495	0.490022218	0.314687376	0.1067073	0.315090487	0.126200287	0.383010996	0.81510662	0.343269238	0.236118504	0.299731475	0.57727253
E07000217	2012	0.497342446	0.596221998	0.602275876	0.34334969	0.19230596	0.184123868	0.645791892	1.485735204	0.292111811	0.387738868	0.221456318	0.341683295	0.410006961	0.785290421	0.756784242	0.252608237	0.840789881	0.017996851	0.11606616	0.898456642	0.975025459	0.782544193	1.142713384	0.305476519	0.509569858	0.379500966	0.13054515	0.795721452	0.07607476	2.108976705	0.055483156	0.248040951	0.194338476	1.013094297	0.649910649	0.202191221	1.810700056	0.451191498	0.298058684	0.119957808	0.290114044	0.114716002	0.351888745	0.734784657	0.340093342	0.222816888	0.281126581	0.55831804
E07000218	2012	0.498228781	0.607683004	0.617619521	0.356636924	0.176575099	0.196235806	0.633243655	1.776715882	0.314656423	0.406975408	0.251710298	0.367223469	0.385777754	0.820579795	0.777618164	0.262797083	0.874857192	0.014922128	0.108326593	0.945951299	0.973148991	0.853673093	1.2316132	0.355335628	0.530473389	0.401745737	0.123191441	0.879335887	0.069666714	2.316427276	0.058835832	0.248146536	0.221347805	1.047023957	0.707271613	0.205368848	1.743572437	0.508338414	0.309251099	0.091059366	0.324251703	0.129368603	0.347906166	0.787907057	0.349201362	0.22313482	0.280755718	0.539219918
E07000219	2012	0.473362613	0.574657548	0.591667609	0.343302273	0.179699946	0.181708442	0.624521834	1.683277475	0.303640261	0.386899271	0.23559675	0.331285119	0.378802656	0.815384574	0.738475062	0.251739994	0.816080487	0.01445785	0.108205012	0.901127781	0.952120766	0.791387222	1.163607857	0.326936384	0.497135392	0.367373182	0.118990041	0.803749294	0.076043903	2.137319794	0.057455338	0.240616649	0.204359446	1.019446785	0.672554372	0.202167757	1.544664957	0.457429985	0.300789426	0.101951457	0.30344947	0.12511753	0.341332801	0.72979503	0.3322369	0.220607615	0.27003244	0.524500481
E07000220	2012	0.49004253	0.587994573	0.59739922	0.339556126	0.188160843	0.183620623	0.637245719	1.538244957	0.293602043	0.386606632	0.228803485	0.336437852	0.397626221	0.776366903	0.748822465	0.250831755	0.827358917	0.016191831	0.108757052	0.897407716	0.957930693	0.79225602	1.150223041	0.31491183	0.507768456	0.370284085	0.125443793	0.799846435	0.073581899	2.129478012	0.054332922	0.246110295	0.198863161	1.01070095	0.658301708	0.20350811	1.724281087	0.454674836	0.29553658	0.102260329	0.294029386	0.117391004	0.346298536	0.74828266	0.334256194	0.224525285	0.274433818	0.5386834
E07000221	2012	0.53493848	0.619930353	0.642544466	0.36667671	0.194934353	0.209494511	0.669895923	1.64609713	0.320087135	0.420489653	0.255512754	0.38464121	0.41019702	0.80073647	0.801763781	0.270442656	0.896228864	0.01644803	0.111960792	0.976265476	1.005321781	0.884419182	1.246501621	0.364070289	0.55131113	0.410291318	0.135984106	0.907586122	0.07417627	2.351541056	0.058393134	0.257457011	0.229568213	1.076233754	0.70144576	0.215126024	1.890308047	0.517865157	0.318511715	0.09508701	0.332198481	0.13124176	0.382390079	0.825926939	0.34371123	0.238931718	0.301678387	0.561274297
E07000222	2012	0.481124325	0.582456179	0.591626706	0.336278944	0.188635724	0.181225986	0.635164672	1.552381753	0.293130427	0.380233375	0.225262392	0.334714334	0.400690344	0.78930981	0.737692165	0.248002142	0.817618889	0.016857941	0.112015773	0.886007979	0.95318215	0.777561706	1.137277458	0.306534028	0.500654554	0.363260873	0.126605632	0.781920096	0.076378164	2.093851157	0.054724199	0.241114762	0.198627315	1.007419606	0.646436604	0.199734532	1.702297918	0.447263961	0.297603213	0.094123195	0.290221402	0.117858982	0.346140702	0.744771921	0.333190277	0.222110748	0.276268857	0.538925115
E07000223	2012	0.528186733	0.61579065	0.63254395	0.366053032	0.186878101	0.203098603	0.654325412	1.714500425	0.31539819	0.417871044	0.25579513	0.374053478	0.399266169	0.80284783	0.799856751	0.266598903	0.890741284	0.015414959	0.105596694	0.966567764	0.987702635	0.880925525	1.244719804	0.360517995	0.553237814	0.402859623	0.126834296	0.88103935	0.068813445	2.360192292	0.056850827	0.254511503	0.226939594	1.056534881	0.70330318	0.215717591	1.779319836	0.513733388	0.313826269	0.098220001	0.324000843	0.129967341	0.364004287	0.816646877	0.348497771	0.236798439	0.289499329	0.542442726
E07000224	2012	0.542935947	0.620423257	0.648139869	0.381678983	0.198260502	0.213595689	0.676890198	1.723255177	0.324272698	0.425110671	0.264613735	0.383776842	0.408572065	0.807512695	0.8031224	0.272962894	0.893461947	0.015861518	0.108247512	0.994674753	1.00501132	0.906565104	1.267895567	0.378472175	0.564999519	0.40200177	0.130828515	0.91136047	0.073643844	2.406776316	0.0576381	0.257933642	0.237713591	1.084723156	0.708982328	0.222939147	1.770552223	0.524679979	0.327782747	0.099595795	0.337512884	0.137780819	0.390624954	0.840276221	0.34034204	0.245552784	0.304347779	0.550946492
E07000225	2012	0.54418498	0.62313983	0.647057212	0.375414268	0.196040205	0.212887001	0.673953755	1.698950785	0.323537022	0.425622859	0.263284257	0.389185828	0.409046321	0.807519682	0.809550055	0.273935498	0.899877407	0.016755035	0.110346923	0.995048405	1.004805658	0.902739035	1.265654943	0.37253999	0.566350645	0.406076895	0.133807746	0.917548867	0.071750069	2.415556966	0.058035719	0.259500691	0.23571899	1.073219001	0.710473475	0.219552869	1.850682467	0.525308123	0.324639163	0.095328105	0.33555805	0.135159967	0.386047222	0.84118167	0.342470066	0.242931894	0.300749934	0.559914894
E07000226	2012	0.440382051	0.561974147	0.558774695	0.335633276	0.17515113	0.164503715	0.600153465	1.600699186	0.289160508	0.370381205	0.217864741	0.29797105	0.373759293	0.81956872	0.707038692	0.241691893	0.776277779	0.014586812	0.112960842	0.856669695	0.940176847	0.733147545	1.10912655	0.293335463	0.474145107	0.347706987	0.11163468	0.735308932	0.075645237	1.991524312	0.05706759	0.233343425	0.182377558	1.002795844	0.640079613	0.194073025	1.443877256	0.414142566	0.291523954	0.113365762	0.278578878	0.118070538	0.318659119	0.66705863	0.332796561	0.210368083	0.256267005	0.52250223
E07000227	2012	0.532042695	0.61947817	0.636882782	0.360402043	0.198956846	0.202248879	0.673472853	1.574170384	0.316580861	0.416273696	0.247651868	0.373846644	0.41747282	0.810404014	0.794371954	0.269098695	0.884415892	0.017961782	0.115324903	0.961813802	1.009537116	0.862393481	1.228107395	0.347284899	0.54866449	0.402599133	0.137871559	0.87978624	0.07506814	2.30451846	0.059584476	0.260261096	0.218838578	1.064100203	0.688663478	0.215719573	1.880294672	0.49896077	0.317298611	0.097551658	0.317719101	0.127121304	0.385838337	0.809293803	0.344233376	0.238302715	0.293918211	0.573203495
E07000228	2012	0.528488257	0.611155158	0.626608316	0.357003757	0.195235285	0.198009351	0.664876882	1.503091813	0.308374896	0.408935768	0.236700392	0.364763729	0.419470656	0.794172993	0.794632901	0.263932202	0.883929011	0.017951021	0.115282327	0.943568705	1.000437736	0.844236728	1.202188639	0.333078936	0.53838215	0.401014485	0.136253973	0.866182825	0.071036948	2.264236811	0.056754321	0.255657841	0.209455288	1.048982035	0.680810044	0.210970186	1.92017902	0.492566687	0.307985595	0.105007584	0.309872972	0.119274507	0.369915904	0.791691774	0.351211878	0.233515488	0.290701344	0.569967909
E07000229	2012	0.508176108	0.606614788	0.618872227	0.368760236	0.186693451	0.19624436	0.648122257	1.729134106	0.316820071	0.409652266	0.250110002	0.363534736	0.398721129	0.831247154	0.778932864	0.26400708	0.861978239	0.016222919	0.11209178	0.957870383	0.997521607	0.851706537	1.223305211	0.348432163	0.537639438	0.392125068	0.12381336	0.857330537	0.074797073	2.28762813	0.058416902	0.250407465	0.219858256	1.061982751	0.699080974	0.211651474	1.711284533	0.490895202	0.315310227	0.105497638	0.319052841	0.131794634	0.361004737	0.793749219	0.34640343	0.229999936	0.287306256	0.555892499
E07000234	2012	0.521945455	0.611154914	0.629598676	0.362033703	0.187705302	0.201910529	0.657414896	1.633655728	0.317851105	0.413609666	0.250306541	0.371515336	0.401907694	0.808176337	0.790920188	0.267709092	0.882921802	0.016488992	0.11207857	0.965040443	0.99337069	0.867574772	1.233470301	0.3521284	0.547382703	0.402122924	0.134539451	0.893955275	0.071240704	2.332544112	0.058719172	0.253610164	0.220545473	1.055081303	0.700717187	0.210098142	1.867844593	0.509596007	0.311300792	0.096742748	0.321813128	0.126804443	0.370065083	0.814833149	0.347699982	0.230804003	0.289174773	0.559409367
E07000235	2012	0.531673141	0.617535204	0.642615134	0.368479213	0.189672561	0.210753801	0.664735249	1.725989853	0.323578306	0.420955558	0.263545635	0.386220576	0.397881109	0.802252891	0.797499061	0.273865985	0.888345009	0.015521002	0.107648255	0.989051749	0.98945192	0.893284923	1.268885679	0.375904772	0.556514942	0.405228264	0.130100326	0.914082121	0.071491658	2.394884714	0.057815386	0.258834079	0.234380905	1.067248162	0.709350923	0.218774661	1.807151004	0.523380576	0.321210531	0.088086377	0.335316065	0.13544304	0.382460416	0.822692412	0.334169695	0.240415021	0.295692429	0.547504792
E07000236	2012	0.461225476	0.571601313	0.582310728	0.337871674	0.175389964	0.175414249	0.615889267	1.648141062	0.294328036	0.38351664	0.228046639	0.316966207	0.376779015	0.804781065	0.726687405	0.24857458	0.809328757	0.014202314	0.105404717	0.882454338	0.941653349	0.769417262	1.14847378	0.317033365	0.484923717	0.362560548	0.116407442	0.778473574	0.073343357	2.089409063	0.055046523	0.240584895	0.192696124	1.009048296	0.661586997	0.200873197	1.519851289	0.440929948	0.295729424	0.105997676	0.296401348	0.120660154	0.331992296	0.690924047	0.331533253	0.218365534	0.259617568	0.516952919
E07000237	2012	0.460682714	0.570672696	0.576141418	0.344166464	0.16854632	0.174153866	0.603028421	1.721638645	0.301427469	0.385441161	0.232064734	0.326930346	0.373626436	0.828314969	0.738988411	0.247846681	0.813209081	0.014714134	0.106780574	0.887906574	0.938260502	0.779067972	1.156333737	0.318507962	0.48912926	0.371700643	0.111225785	0.791238949	0.070957261	2.135934005	0.058296837	0.234252826	0.199168539	0.999408366	0.670003733	0.195617967	1.533157601	0.454923435	0.292595149	0.102041491	0.296277803	0.121829362	0.320856627	0.730251406	0.338355665	0.207683024	0.258635037	0.525639351
E07000238	2012	0.524893266	0.613898804	0.633305038	0.358302361	0.190296098	0.205609867	0.659867548	1.681908552	0.314780042	0.412003913	0.254973613	0.372524622	0.400381566	0.792140805	0.77955008	0.264828909	0.879497804	0.015046306	0.107381524	0.964050701	0.984115787	0.87289581	1.237302345	0.361363936	0.545673229	0.397998098	0.130770041	0.886129658	0.072258882	2.331922868	0.057643362	0.256019946	0.225734632	1.057164472	0.700535355	0.214239399	1.794182812	0.507907611	0.315374701	0.087477617	0.326399927	0.130984307	0.37330775	0.801272943	0.338647066	0.236646407	0.292680534	0.546821092
E07000239	2012	0.509516629	0.601695792	0.620823091	0.351945668	0.185511484	0.196810182	0.645140186	1.723576382	0.308130535	0.407787385	0.250410614	0.36069325	0.392320093	0.794061469	0.772261805	0.263415395	0.866288886	0.014897358	0.102862501	0.940984348	0.964635333	0.853671802	1.217457634	0.355582595	0.530838824	0.392683194	0.125875197	0.860084379	0.069611303	2.298503777	0.056603618	0.249861871	0.219072287	1.044322016	0.691929307	0.211717289	1.713811969	0.497068211	0.312011944	0.087815624	0.320751744	0.128018092	0.359291311	0.784967433	0.336349034	0.233075725	0.279588232	0.530803321
E07000240	2012	0.509071436	0.592880304	0.604426487	0.337923557	0.197977259	0.18728064	0.652297113	1.380269644	0.292876031	0.388762163	0.218130284	0.350399609	0.417732159	0.770588763	0.755782105	0.253386492	0.842948457	0.019777619	0.119195603	0.893642845	0.976613454	0.7826269	1.130397307	0.303049144	0.506686337	0.38926745	0.131960358	0.79392607	0.075684818	2.078740925	0.055860155	0.247624986	0.196498353	1.002180481	0.640931422	0.201914255	1.867903657	0.446643816	0.29732391	0.111348883	0.286216828	0.113357669	0.361983855	0.762035277	0.332550903	0.223863911	0.287313427	0.572635171
E07000241	2012	0.442333113	0.547461233	0.559967268	0.319239026	0.180686061	0.174286862	0.611020535	1.500476431	0.281302409	0.356735197	0.214681355	0.305070013	0.379653422	0.779466551	0.681130161	0.235353441	0.753607952	0.014921426	0.112575493	0.84799626	0.930633069	0.729101641	1.089245317	0.292223943	0.469168064	0.339397026	0.113951573	0.728403278	0.080336561	1.92738312	0.054000499	0.233062848	0.188776099	0.986940776	0.619974628	0.194521512	1.48113237	0.40819977	0.292329777	0.090514287	0.27611291	0.117562645	0.341805781	0.672573537	0.317425594	0.215870057	0.268732223	0.517955393
E07000242	2012	0.501956361	0.601235382	0.609954467	0.348094094	0.187502542	0.189206835	0.650628907	1.504160568	0.306653878	0.399634999	0.232386981	0.351676791	0.407593517	0.797843483	0.771085897	0.261194345	0.856815383	0.017261178	0.114738204	0.928613105	0.988368244	0.809991955	1.183897173	0.320168726	0.520702269	0.389132276	0.135517048	0.836379336	0.073848923	2.19149951	0.058513205	0.252343171	0.200956207	1.028846413	0.673925027	0.205230393	1.848443332	0.470865797	0.302252066	0.099675507	0.299630279	0.119272493	0.355633561	0.760534347	0.34805358	0.227058099	0.278256727	0.568579923
E07000243	2012	0.454484575	0.570950819	0.569421576	0.332382349	0.177724842	0.171172888	0.606786047	1.571676796	0.287406478	0.369947324	0.220333965	0.314627487	0.379455615	0.798204606	0.719893299	0.243608056	0.784371783	0.015421439	0.110733866	0.867099779	0.93861565	0.74826003	1.112480617	0.297947224	0.48415175	0.354294306	0.116362192	0.753891427	0.075608268	2.034528092	0.055871054	0.237072881	0.189028421	1.001016389	0.644499308	0.194735801	1.573533374	0.42878515	0.289080735	0.109393373	0.278238957	0.11742532	0.325172841	0.704200647	0.329593692	0.21378353	0.262542082	0.527785777
E08000001	2012	0.435976378	0.537454367	0.555398878	0.317424779	0.1727894	0.169296122	0.597944455	1.594833121	0.28609815	0.359269493	0.218113099	0.300630524	0.358970473	0.785943447	0.686020163	0.234556251	0.749391465	0.013061469	0.105301218	0.84238187	0.907203143	0.732687682	1.087175427	0.302790456	0.457768017	0.337433344	0.107977105	0.728045292	0.079327294	1.945128202	0.054243363	0.227507324	0.19227594	0.96973148	0.627211162	0.19365956	1.354261113	0.407179436	0.289528567	0.099406663	0.283377738	0.122465085	0.326381533	0.666789435	0.305006311	0.21201732	0.258533524	0.492029267
E08000002	2012	0.466823136	0.566198119	0.575927119	0.337638891	0.171794545	0.17673818	0.603643508	1.624438593	0.29385487	0.378686379	0.227202313	0.327557891	0.37118751	0.789178028	0.732966055	0.246757994	0.807603482	0.014775723	0.103899006	0.878950436	0.930328229	0.772527396	1.131126541	0.31631276	0.489069943	0.365768408	0.115701426	0.789892502	0.070642251	2.104210225	0.056061646	0.234367877	0.196911397	0.994760117	0.657261709	0.19489329	1.580389117	0.451350831	0.28891873	0.105420367	0.293052261	0.118896461	0.324904014	0.727553764	0.331300999	0.210681875	0.260400381	0.517707983
E08000003	2012	0.350112147	0.476611598	0.47391105	0.274016677	0.154512374	0.132068038	0.522804041	1.610865835	0.247317328	0.301340468	0.183649503	0.242398296	0.323003182	0.794184897	0.584397298	0.202179771	0.628191682	0.012595907	0.111227292	0.714812888	0.811137998	0.594411755	0.933976382	0.24365791	0.38149471	0.283484607	0.080759788	0.572431177	0.077889104	1.59387461	0.050413151	0.197356995	0.160285103	0.865026835	0.544105243	0.166496862	1.066072373	0.320611868	0.265129506	0.093388832	0.230457312	0.109488191	0.275232459	0.579574606	0.279049913	0.182659257	0.226314695	0.453724827
E08000004	2012	0.422077941	0.520601192	0.543454243	0.315157048	0.168545404	0.165282034	0.587657034	1.565980036	0.282197649	0.352118098	0.210873295	0.288369834	0.349813169	0.778941672	0.672866595	0.229428574	0.73074028	0.012340696	0.102512668	0.824834749	0.894349098	0.708586824	1.062207336	0.293413118	0.442366746	0.327437689	0.102956522	0.700396374	0.080664739	1.872031608	0.053243695	0.221475718	0.187190867	0.949501563	0.616671808	0.190541065	1.278137416	0.389186973	0.283899348	0.107618811	0.277763637	0.120874253	0.317986176	0.632970782	0.296464868	0.207335504	0.254093832	0.479359526
E08000005	2012	0.432629232	0.534428293	0.553025526	0.321336532	0.171768091	0.167832854	0.594524795	1.614215177	0.286758443	0.358621355	0.216769078	0.299286222	0.357650022	0.794486012	0.688107815	0.233879439	0.748905321	0.01312427	0.105302342	0.843176773	0.911455453	0.726678679	1.082732341	0.300221673	0.453936056	0.338044994	0.107341587	0.729268862	0.080985471	1.935758791	0.054348246	0.224661838	0.19282312	0.975936792	0.631356806	0.191707717	1.34732316	0.405520311	0.287390136	0.103502618	0.282874744	0.122466636	0.321821465	0.665659419	0.306007531	0.208897854	0.258325641	0.491889792
E08000006	2012	0.42381256	0.537012367	0.538032372	0.325737878	0.158461942	0.158843981	0.56207919	1.71893012	0.282581808	0.357938356	0.218557055	0.302142279	0.346971074	0.811606697	0.694431451	0.232415258	0.753064222	0.01380769	0.103345551	0.829646631	0.88310905	0.726147133	1.082350783	0.299014127	0.4559811	0.343461908	0.099555786	0.72910539	0.06859153	1.999625884	0.054978808	0.217560415	0.187430486	0.946285809	0.630468586	0.18368769	1.383190395	0.419470208	0.279358685	0.103698624	0.277027402	0.118646736	0.294816112	0.689361691	0.319427	0.194885698	0.24212207	0.491272522
E08000007	2012	0.478769718	0.57375366	0.587612927	0.33921234	0.181215506	0.183362818	0.622634196	1.588766524	0.296859875	0.38416397	0.231172021	0.336733318	0.381588655	0.785552336	0.736260225	0.249439655	0.812039757	0.015126498	0.106930569	0.893737412	0.943531206	0.789882555	1.146479558	0.321516923	0.500556657	0.366608572	0.121444867	0.797290785	0.07455118	2.119588522	0.055287241	0.239359862	0.203466487	1.005049268	0.65448324	0.20072695	1.617288238	0.453718458	0.2974649	0.099228905	0.297631838	0.122559032	0.344983034	0.739316163	0.325389412	0.219853368	0.271714276	0.524410653
E08000008	2012	0.451121994	0.559977291	0.56733756	0.337729303	0.1664697	0.172427918	0.590535683	1.723863746	0.294581654	0.376152591	0.230556005	0.322175011	0.359732919	0.808529236	0.717809403	0.24461332	0.795385554	0.013827996	0.10316225	0.871411266	0.922630066	0.771112269	1.134579624	0.32129213	0.480882997	0.36410448	0.108593068	0.781978381	0.070413374	2.104811687	0.056635959	0.228635377	0.198832214	0.992941828	0.660837712	0.194044857	1.479813735	0.445960268	0.29035912	0.101819414	0.296254495	0.123521485	0.315983599	0.720776009	0.32637292	0.207783041	0.255359508	0.506849449
E08000009	2012	0.458692417	0.560580245	0.572526614	0.330338879	0.178134475	0.176451729	0.612977971	1.543488336	0.292853114	0.373741611	0.223973303	0.322929291	0.376868485	0.789277247	0.71043987	0.244262662	0.78322501	0.014987384	0.109979831	0.87433433	0.937140487	0.75765537	1.119559828	0.307937945	0.480832279	0.357359722	0.116019526	0.761396383	0.077620241	2.022078031	0.056251909	0.234788974	0.195425119	0.98653185	0.641002998	0.196664037	1.537798359	0.428496925	0.29332361	0.100452605	0.286964363	0.121727919	0.339280972	0.702918119	0.318540076	0.214360771	0.267515188	0.525818551
E08000010	2012	0.470774958	0.57388075	0.581854767	0.345140153	0.166964994	0.177622667	0.601137764	1.733384215	0.29968614	0.388335212	0.235111785	0.337048943	0.36805553	0.809385658	0.743844346	0.25154507	0.827942557	0.014532905	0.103027051	0.894630041	0.933561865	0.795065964	1.163492864	0.329126136	0.496747161	0.379514792	0.114738563	0.818306317	0.067095668	2.18316719	0.057856116	0.234871884	0.201277303	1.003359942	0.678097584	0.195747485	1.605558811	0.471170936	0.28943514	0.102087373	0.303439107	0.120510081	0.322577208	0.753866086	0.338609865	0.209220785	0.257478107	0.520346588
E08000011	2012	0.458297539	0.567048965	0.575135781	0.348449227	0.161565602	0.177014734	0.588522718	1.774054327	0.302276218	0.386586059	0.239758931	0.333709349	0.357921783	0.822149313	0.739750038	0.250859858	0.818715402	0.013926652	0.100469902	0.893017422	0.933359963	0.795419408	1.16515011	0.330515973	0.493276687	0.378434384	0.109138659	0.809853512	0.066199048	2.184278106	0.058485296	0.230671787	0.20393692	0.994562945	0.682143158	0.193739874	1.492562287	0.465021694	0.290247723	0.100130589	0.306312448	0.125823561	0.309772928	0.74092197	0.336441237	0.205247902	0.251188379	0.515124084
E08000012	2012	0.421695228	0.541079616	0.544089991	0.321808624	0.157490138	0.161579545	0.567956105	1.781341692	0.283624106	0.357965284	0.2222077	0.309223901	0.35099714	0.822966374	0.701007973	0.233921162	0.759279166	0.014175163	0.103375626	0.836028021	0.8846588	0.733069395	1.094752973	0.302481416	0.45985409	0.348370308	0.099809073	0.736974199	0.06973047	2.015515237	0.054811513	0.218899391	0.191990789	0.946736097	0.636297765	0.184319198	1.387668893	0.425274346	0.28212153	0.088396624	0.283360872	0.120069805	0.297277955	0.706630913	0.320426391	0.196782436	0.242479242	0.49285721
E08000013	2012	0.478293611	0.574841222	0.587008435	0.347689288	0.170081615	0.183319306	0.607676772	1.747693851	0.304845114	0.391958439	0.241967039	0.343395943	0.370523657	0.80938861	0.746975674	0.253837366	0.833370142	0.014612708	0.102313924	0.906859174	0.936617117	0.814604161	1.178321985	0.338855187	0.507288454	0.380266485	0.117853221	0.837730471	0.066818624	2.222415731	0.057531354	0.236679328	0.208244546	1.011792572	0.681786256	0.198733685	1.59134392	0.478681301	0.294930608	0.095531341	0.309510732	0.124121532	0.329994473	0.768469067	0.335572473	0.212434531	0.260164073	0.522746681
E08000014	2012	0.493787208	0.582055013	0.602142887	0.352765359	0.177468031	0.191407152	0.624683199	1.69870545	0.307408562	0.398554023	0.248168444	0.352931634	0.37896262	0.79728481	0.757858086	0.258533694	0.841011942	0.014856952	0.102688692	0.926631767	0.94815663	0.836403504	1.19726322	0.346402205	0.523750422	0.382122152	0.120774126	0.85118493	0.067500849	2.263576761	0.056184545	0.241747155	0.215884707	1.022404703	0.682428621	0.204786645	1.635707615	0.48785937	0.303045764	0.091542142	0.31554724	0.126884801	0.344987532	0.781194615	0.335768542	0.222530087	0.271176762	0.525478662
E08000015	2012	0.481758095	0.576829656	0.590738713	0.348163955	0.17296039	0.186091904	0.613385487	1.676591453	0.303442595	0.391250119	0.240621211	0.347369316	0.374555736	0.800324283	0.755855632	0.255225125	0.82905017	0.015026936	0.103968922	0.9140667	0.942146199	0.813944394	1.175164717	0.337405565	0.512341763	0.376789558	0.118508981	0.836346989	0.068307139	2.208580743	0.056640633	0.238166187	0.209468853	1.01037315	0.673669878	0.200198339	1.632777162	0.478276085	0.297073007	0.09497783	0.309013112	0.124149933	0.337284093	0.769335438	0.333938479	0.215656352	0.265443328	0.52223388
E08000016	2012	0.4659486	0.565268408	0.577568285	0.349287895	0.165141038	0.178182793	0.593549081	1.779890857	0.302192032	0.38706134	0.239742059	0.336988264	0.360828813	0.819695602	0.735013021	0.249375783	0.817089824	0.014078378	0.102022583	0.890406081	0.92861999	0.79796682	1.163621951	0.332136156	0.494207877	0.375429803	0.11268151	0.817859065	0.066645647	2.192095433	0.058339667	0.231109213	0.205293682	0.999473926	0.677158186	0.194960694	1.537898445	0.471828985	0.291160013	0.100642285	0.30487184	0.124884681	0.320847649	0.763560905	0.330288424	0.207467824	0.255910231	0.513576413
E08000017	2012	0.457603083	0.556480795	0.567751875	0.343278496	0.163054708	0.175653192	0.584430069	1.749246386	0.297210573	0.381306624	0.235843911	0.329041641	0.354191501	0.802655997	0.721805051	0.245011555	0.803132324	0.013669654	0.09937167	0.876999367	0.913336773	0.786084137	1.142577188	0.327751028	0.487478592	0.367740878	0.110476442	0.799527299	0.065692124	2.156848228	0.057241546	0.227700597	0.20125037	0.976321944	0.664824975	0.192569303	1.483484908	0.461476593	0.287034654	0.102099025	0.301615447	0.122968614	0.315117809	0.736125182	0.326687855	0.203677991	0.25065715	0.505005276
E08000018	2012	0.456983999	0.552920567	0.571579426	0.330672224	0.1705597	0.177524945	0.60066304	1.650547212	0.29283001	0.374520285	0.230147224	0.322012107	0.361919268	0.782839103	0.707655063	0.242260486	0.78689148	0.013554583	0.102984464	0.871123531	0.912453152	0.77503311	1.128692025	0.320793178	0.482496947	0.356006991	0.112929722	0.778153411	0.072403269	2.082289045	0.054713829	0.231254596	0.200098686	0.978755951	0.650150653	0.195936643	1.473863912	0.442962606	0.290951848	0.094460947	0.298310329	0.122839732	0.329554998	0.714208078	0.314939248	0.213359113	0.260041993	0.500426312
E08000019	2012	0.420140173	0.522886028	0.534730558	0.313935726	0.164549019	0.161867204	0.571559962	1.613578341	0.277134661	0.347851696	0.212029927	0.293752525	0.349478807	0.783221069	0.668602167	0.22525357	0.72890134	0.013716108	0.103729849	0.811072927	0.875873138	0.708582243	1.053839154	0.288773126	0.443882656	0.329149909	0.102158653	0.700770884	0.074912563	1.905608422	0.053419992	0.217358479	0.18597285	0.931280626	0.607793415	0.184090014	1.339799633	0.399579729	0.278541369	0.094535796	0.272505722	0.118007203	0.308114605	0.669959659	0.300905971	0.199413862	0.249477195	0.482761199
E08000021	2012	0.407157548	0.518699634	0.526663577	0.304427525	0.160020742	0.157332751	0.565144499	1.651036272	0.270610158	0.343737938	0.207352894	0.288995958	0.347215872	0.788495366	0.663040168	0.220976583	0.722450016	0.013811479	0.102321099	0.801003255	0.860429311	0.693139869	1.041951939	0.281327523	0.435118028	0.327537473	0.09815501	0.681850856	0.074882488	1.876782308	0.052399834	0.214197812	0.182714002	0.914011459	0.601019929	0.180852078	1.310440902	0.390769045	0.276013389	0.085740258	0.269355672	0.114982739	0.298245135	0.659743804	0.302231449	0.195561912	0.240860118	0.476466616
E08000022	2012	0.481655534	0.584342023	0.597736658	0.353295609	0.172225974	0.183267062	0.620111649	1.766082503	0.306700721	0.397234093	0.244306367	0.346514109	0.376748061	0.827710151	0.760143154	0.25602226	0.838582131	0.014572225	0.103828947	0.920155133	0.95219793	0.81888579	1.194777678	0.340678679	0.510687527	0.383604708	0.116336647	0.833417661	0.070381551	2.237274357	0.058362904	0.239747879	0.211440573	1.021021414	0.689264873	0.203064407	1.569980116	0.479857565	0.299958582	0.099042067	0.312593312	0.127482853	0.333035555	0.77236952	0.339710771	0.216710281	0.265659729	0.529611143
E08000023	2012	0.47419876	0.578902422	0.59165412	0.347282462	0.171304821	0.183196714	0.613002389	1.780579883	0.302899341	0.388837643	0.243385788	0.34612175	0.371363192	0.818094025	0.749999413	0.253970417	0.825615867	0.014803661	0.10360873	0.908166441	0.939240232	0.810414392	1.175462083	0.335546461	0.506684602	0.37525469	0.115329379	0.820979307	0.070659018	2.21075885	0.056984122	0.237057208	0.211610664	1.006396417	0.680619326	0.199577199	1.573068257	0.473618629	0.29773354	0.094263868	0.31159378	0.127779982	0.330477669	0.778128766	0.331264959	0.215783928	0.263131386	0.517262771
E08000024	2012	0.469714566	0.574166909	0.58567529	0.344186885	0.169462605	0.181086997	0.605277459	1.782339655	0.302500085	0.387965082	0.240251481	0.337895384	0.367667931	0.823595421	0.746478394	0.25256003	0.823807539	0.014245498	0.102451454	0.902657858	0.933885655	0.805060417	1.174971901	0.335476522	0.502316084	0.376552637	0.11287528	0.822421208	0.069245315	2.204776245	0.056636475	0.234764306	0.208626597	1.012794875	0.681592473	0.198065999	1.542292942	0.472998468	0.29698497	0.094743175	0.30927037	0.125936843	0.327173793	0.75534706	0.335606279	0.212731339	0.261002276	0.512824077
E08000025	2012	0.382901087	0.490046378	0.516448972	0.27789826	0.183439124	0.150666332	0.59308746	1.422871295	0.260857214	0.313735693	0.189194678	0.247398466	0.349983319	0.769458452	0.602775069	0.208860157	0.643724638	0.012150813	0.115128556	0.759263231	0.872700027	0.625464086	0.962342962	0.25575655	0.396937662	0.281183414	0.097034745	0.586352799	0.100541235	1.579964283	0.051465742	0.212168187	0.174084205	0.921868738	0.552431309	0.185851974	1.040660985	0.311417783	0.288181962	0.098248415	0.248278458	0.122046391	0.330115658	0.556852891	0.260395682	0.212858924	0.262753986	0.458373372
E08000026	2012	0.418421961	0.521994561	0.5395591	0.300933334	0.181849085	0.161707844	0.601851347	1.525136053	0.274643875	0.340293782	0.203705937	0.280425958	0.363940891	0.787398	0.656056225	0.223423398	0.709907764	0.013559383	0.11084163	0.805875037	0.895207694	0.688226811	1.035372721	0.277363797	0.435735681	0.313541141	0.105288166	0.66670248	0.088043346	1.79194636	0.052385212	0.223539975	0.184412488	0.955231374	0.592334443	0.191128022	1.264187849	0.367444748	0.289759396	0.097547697	0.270607466	0.120464406	0.32873113	0.635681394	0.292016861	0.212181339	0.263329821	0.486202361
E08000027	2012	0.476628317	0.570248491	0.591650906	0.337303235	0.18136191	0.18447512	0.626239094	1.640939552	0.299806382	0.383278738	0.235403533	0.329971254	0.3791896	0.792808684	0.730594816	0.250226205	0.808625123	0.014283843	0.10751409	0.894917261	0.943198807	0.798996321	1.156897252	0.328717253	0.499531095	0.364821246	0.118116745	0.796508379	0.07472541	2.129596983	0.056248788	0.240301281	0.205175617	1.009554624	0.66092048	0.203788867	1.547617165	0.450809664	0.303044877	0.095564217	0.303620121	0.12541422	0.348194081	0.7270913	0.323281151	0.223966458	0.275074432	0.518644635
E08000028	2012	0.416134337	0.521591313	0.545018884	0.305293701	0.179388027	0.163714949	0.601099168	1.541420961	0.278353135	0.341986457	0.208834569	0.276751152	0.355816327	0.789522232	0.658470116	0.226567712	0.709707223	0.012434075	0.112770555	0.816385541	0.905645302	0.69683343	1.045492883	0.28743167	0.438071297	0.312071097	0.102650758	0.6707399	0.089674387	1.808706714	0.054709215	0.224443264	0.185976434	0.960686465	0.601935149	0.194243057	1.196618187	0.366086338	0.296568205	0.104582501	0.274236858	0.126141936	0.331223697	0.619866836	0.288106442	0.217385414	0.267020022	0.478983954
E08000029	2012	0.494077381	0.577655559	0.60286484	0.34102931	0.191476795	0.191186652	0.646822675	1.543389081	0.306405399	0.390552393	0.236498225	0.34410132	0.394658115	0.793666403	0.745330682	0.255463461	0.822672226	0.015701116	0.111561879	0.915821401	0.967274807	0.808477618	1.166622111	0.327678279	0.511515507	0.370857825	0.127491809	0.822349327	0.078424569	2.151212231	0.057201384	0.245769142	0.21014592	1.028765141	0.662122463	0.20618787	1.642801371	0.459311837	0.305395845	0.092197206	0.304952855	0.125739811	0.365702139	0.750092639	0.327272188	0.228964221	0.283131138	0.540762199
E08000030	2012	0.438108452	0.535790693	0.563632896	0.318563996	0.176892175	0.17386576	0.608994469	1.598138469	0.289642736	0.360444487	0.22223893	0.300636014	0.360483408	0.790854304	0.689389731	0.236282581	0.748663453	0.012928811	0.107122689	0.849987821	0.913990853	0.744354427	1.095935277	0.307367875	0.461463063	0.334527598	0.108795085	0.726854104	0.083106502	1.950426984	0.054506689	0.229105099	0.195736025	0.971855149	0.628371322	0.197086188	1.326820607	0.405699711	0.296604754	0.099786195	0.289941337	0.126748967	0.338260555	0.668311415	0.298606448	0.218107536	0.268058677	0.489485079
E08000031	2012	0.418125619	0.530179358	0.555656863	0.306242711	0.184076927	0.167629221	0.611507771	1.600009276	0.280344878	0.343999056	0.213728672	0.286108722	0.361889248	0.801355354	0.660875651	0.228170717	0.71282736	0.012675499	0.115859565	0.825790445	0.914877229	0.707975922	1.060698272	0.294079186	0.445934114	0.315815692	0.104342032	0.682773533	0.094052359	1.837050286	0.053743171	0.225432475	0.1928965	0.9752984	0.605880551	0.195796804	1.233086819	0.376241265	0.301743691	0.096123614	0.276342536	0.129655974	0.342114861	0.650653261	0.287551027	0.221355829	0.273522626	0.484634492
E08000032	2012	0.400682561	0.497547065	0.5220804	0.294709435	0.169635196	0.156756665	0.576453799	1.472801553	0.268878696	0.331316795	0.196109169	0.267251777	0.342892084	0.75168293	0.639194355	0.216604066	0.688450826	0.011734021	0.102455694	0.785368699	0.868680345	0.663792815	1.002125348	0.272236083	0.413891478	0.3054833	0.100204447	0.644144069	0.085413735	1.72568899	0.05060873	0.214560711	0.176720608	0.913870603	0.582537281	0.184062398	1.176525072	0.35377431	0.276076174	0.106918576	0.260581115	0.11624856	0.316898628	0.583210948	0.280503097	0.204912199	0.25199474	0.460424427
E08000033	2012	0.460935915	0.560611158	0.571210335	0.335543176	0.171179935	0.174479143	0.601316218	1.643892222	0.292703405	0.375576431	0.227962092	0.324878355	0.367768269	0.790777094	0.717845595	0.242830216	0.794117089	0.01424987	0.103789578	0.874109058	0.921809699	0.767349676	1.126684664	0.316226206	0.481895278	0.360655201	0.11325652	0.780914095	0.073126265	2.085248433	0.055916438	0.231546364	0.200302019	0.993399975	0.654136344	0.194081476	1.532313851	0.445278244	0.288748965	0.099221905	0.291673525	0.121445465	0.323139634	0.724693132	0.324422281	0.210383641	0.259533678	0.511233031
E08000034	2012	0.431552041	0.531483461	0.55095786	0.311397867	0.172986404	0.168154375	0.595910746	1.547171222	0.280654659	0.353359507	0.213376139	0.297596488	0.358344457	0.769642467	0.674843591	0.231399634	0.739813299	0.013117633	0.104685018	0.830502041	0.897130187	0.719405812	1.069715954	0.296482509	0.450074948	0.332650344	0.108029026	0.713967237	0.079922094	1.900705373	0.053270846	0.225405356	0.189023007	0.958359173	0.615375003	0.191383646	1.364140396	0.399209545	0.28638639	0.097312828	0.278236645	0.119871831	0.32807473	0.656480047	0.298856546	0.210993108	0.259549326	0.487145384
E08000035	2012	0.423563314	0.533679581	0.538525347	0.313781597	0.165646926	0.1614725	0.574436243	1.592807421	0.275709017	0.350067816	0.212420932	0.295671745	0.355201525	0.778316279	0.674252062	0.227837343	0.739155228	0.014219739	0.104871838	0.815467942	0.882001301	0.711106983	1.058086639	0.287951738	0.451520454	0.332826805	0.103768007	0.706775318	0.073520414	1.920280187	0.053354459	0.220162121	0.18439182	0.939931816	0.609898971	0.184547118	1.389057566	0.403357093	0.279529054	0.093773018	0.271505057	0.115948953	0.306994704	0.669783172	0.308047126	0.200547602	0.249172908	0.489557509
E08000036	2012	0.460456884	0.564348729	0.57563006	0.338350902	0.165559242	0.177285883	0.595674484	1.73312185	0.296307473	0.382783139	0.235207728	0.330285816	0.360863848	0.801668359	0.728886154	0.247626018	0.807728073	0.013998964	0.101464997	0.886196109	0.915804554	0.788386401	1.152573751	0.32920628	0.490100506	0.368742449	0.110986349	0.803551272	0.067730317	2.157500007	0.056486849	0.232040148	0.201717403	0.989303227	0.668344805	0.196009787	1.519578647	0.461134797	0.290803683	0.096724347	0.303177488	0.12350433	0.321188363	0.738554418	0.3261935	0.209465249	0.255224441	0.506486523
E08000037	2012	0.467828007	0.572848676	0.585456085	0.345099509	0.170308711	0.179185803	0.60655446	1.782950512	0.301168974	0.387467562	0.239852597	0.337259051	0.370298974	0.823292125	0.739550083	0.250170494	0.818510964	0.014660135	0.104775978	0.895495082	0.933699976	0.799462237	1.165411973	0.330305984	0.499173853	0.371929545	0.113436705	0.806440484	0.070960547	2.183341636	0.057091891	0.234460766	0.206656811	1.003357925	0.675020825	0.198105436	1.534782536	0.464469773	0.297325873	0.096644125	0.306178571	0.126058772	0.326734278	0.760933025	0.33136627	0.212542278	0.259646652	0.516052196
E09000001	2012	0.45509779	0.64266991	0.63913492	0.313510738	0.217244441	0.169710518	0.718070381	1.867770907	0.294413762	0.358253619	0.219162407	0.338591347	0.447370931	0.901930866	0.723315272	0.23321585	0.799372906	0.017761699	0.143204848	0.870181872	0.993372493	0.768971557	1.182398983	0.317331371	0.513150649	0.346900177	0.112553392	0.691920364	0.109089719	1.99632566	0.046799234	0.25045684	0.216773476	1.052013765	0.633207973	0.212004472	1.512746295	0.399255	0.34970573	0.065227438	0.28601952	0.133731369	0.371841039	0.772517525	0.332580427	0.251698548	0.295286656	0.548101541
E09000002	2012	0.383709344	0.51480393	0.510151955	0.302852429	0.175942589	0.146211778	0.563457189	1.406597847	0.26576349	0.324675153	0.201868425	0.247572062	0.340982624	0.809838696	0.602973184	0.223477375	0.647350436	0.012891272	0.120811375	0.776747385	0.90389042	0.628765293	0.991192832	0.263306557	0.411362129	0.298848616	0.089690823	0.625558583	0.088457103	1.665119404	0.060971503	0.215461889	0.17044867	0.968588186	0.576172161	0.186333693	1.039284585	0.325893843	0.286683204	0.123604059	0.234471327	0.123398907	0.307406571	0.559519917	0.279034744	0.203142841	0.255430416	0.49968028
E09000003	2012	0.452896404	0.573031321	0.586955436	0.30714651	0.213060784	0.177181509	0.664509365	1.395696779	0.276800717	0.349514376	0.204529091	0.295149578	0.416502898	0.803961547	0.673485847	0.234827755	0.749942005	0.016052188	0.129427763	0.841839288	0.977096361	0.697987261	1.074715459	0.280964167	0.46319815	0.332602807	0.119374026	0.678993115	0.105401958	1.783652861	0.055559917	0.240647656	0.19043047	1.037801826	0.604495698	0.203716309	1.345963806	0.369318186	0.313823217	0.100061299	0.267396402	0.123030488	0.379224478	0.61583858	0.301381392	0.233628925	0.298807065	0.538316435
E09000004	2012	0.475055039	0.598888726	0.589892842	0.342074351	0.190780424	0.18290599	0.629748309	1.500336754	0.297643842	0.379933299	0.236965192	0.321675696	0.391000044	0.824950251	0.727393387	0.251520397	0.795384026	0.016146369	0.119023416	0.892438688	0.986970922	0.776165292	1.15077099	0.315377602	0.51013601	0.364412525	0.119130412	0.789209061	0.079766073	2.092992622	0.060983282	0.247142177	0.200776065	1.05401456	0.653423608	0.206037182	1.533089112	0.44146882	0.30627653	0.107052294	0.287043876	0.126579096	0.351523359	0.699538945	0.325846021	0.223301835	0.285690945	0.557426569
E09000005	2012	0.377823957	0.537995264	0.546952832	0.259196756	0.24034175	0.151893827	0.673733769	1.295219054	0.24266676	0.288930478	0.174108914	0.224977719	0.40434756	0.8222944	0.547132409	0.20415403	0.624715085	0.0139279	0.147335102	0.727546454	0.960602745	0.56443704	0.944657878	0.232194428	0.387051807	0.259210401	0.104157979	0.504434483	0.142860692	1.320377626	0.05370144	0.22904413	0.173897645	1.028488444	0.517378102	0.19864005	0.855405752	0.24474865	0.329605893	0.09346728	0.227803958	0.131220418	0.394828095	0.51609601	0.23758404	0.248783858	0.314457828	0.507748918
E09000006	2012	0.514752344	0.62166292	0.628021901	0.352485201	0.206626081	0.196429188	0.677154848	1.471318492	0.306888039	0.396446724	0.237262799	0.358059516	0.426939572	0.826044785	0.772873634	0.263897742	0.853466443	0.018645402	0.123985135	0.938177435	1.029160158	0.81741031	1.189068753	0.325282641	0.535441394	0.386447367	0.134374748	0.832950334	0.083459015	2.167219354	0.059858099	0.256363122	0.211267156	1.078924582	0.674762475	0.213560463	1.744379888	0.468023708	0.320100242	0.105261269	0.302876359	0.126073869	0.381320776	0.746070991	0.344571747	0.238177476	0.304524471	0.585179834
E09000007	2012	0.453139008	0.605140568	0.577280856	0.296311042	0.224700394	0.163288532	0.669054302	1.49854501	0.269555245	0.335149845	0.195937103	0.297765166	0.455061163	0.840151736	0.661673926	0.22974568	0.749419479	0.022954133	0.137817674	0.806273383	0.952232238	0.670228214	1.059033786	0.260594089	0.46004555	0.321068026	0.114198941	0.643428699	0.1050837	1.72553843	0.052749509	0.234550133	0.185645302	1.018908499	0.573622067	0.194395342	1.431493975	0.364854352	0.317969495	0.085785745	0.248717442	0.116903314	0.348304195	0.697986843	0.299734338	0.227455399	0.290501828	0.558873228
E09000008	2012	0.429310007	0.578046329	0.560993678	0.308694397	0.205188386	0.167202138	0.631815513	1.39018332	0.270767923	0.339306423	0.208202355	0.278842788	0.395183085	0.807394653	0.645647063	0.234011236	0.713477976	0.015226394	0.130128968	0.820278057	0.972554979	0.674257276	1.057509672	0.274625338	0.461939532	0.317589114	0.113396321	0.66961776	0.09923564	1.759642715	0.058387368	0.235278902	0.181965736	1.041109765	0.594755519	0.199768235	1.272080309	0.35826818	0.311183892	0.104134939	0.26040609	0.124569691	0.351823469	0.604568847	0.297103492	0.227274587	0.289254807	0.531861611
E09000009	2012	0.427803346	0.561000613	0.571790606	0.284329806	0.232408457	0.162734793	0.688717874	1.339521512	0.266550923	0.323738048	0.185645567	0.265533998	0.425053013	0.818126551	0.630757827	0.222832898	0.705488	0.015731002	0.142166361	0.797905639	0.977366992	0.635230512	1.015376411	0.248860566	0.429388879	0.298306759	0.118845988	0.578876896	0.126943346	1.556601706	0.054454776	0.236727246	0.178085779	1.033959333	0.567921843	0.202231746	1.12120748	0.303131805	0.322858789	0.09806019	0.254600589	0.12547666	0.382692183	0.562277567	0.274238299	0.242688931	0.302857304	0.523021106
E09000010	2012	0.42129196	0.553749699	0.55825867	0.308274032	0.192277797	0.165022208	0.617250441	1.469317056	0.279856459	0.343487655	0.212100308	0.278979482	0.37970188	0.822543626	0.652164067	0.232467346	0.711909426	0.014198176	0.126086128	0.825043503	0.950809583	0.685670878	1.061203599	0.284091935	0.447957319	0.324200171	0.105099519	0.677750767	0.09676185	1.791271272	0.059094185	0.230967736	0.187097653	1.018589466	0.608917702	0.197501434	1.216828401	0.363574899	0.306234256	0.104939984	0.260986417	0.127701979	0.345844531	0.605099649	0.29751718	0.221005215	0.279860078	0.522574555
E09000011	2012	0.413064608	0.571184724	0.54032335	0.306482815	0.187132286	0.154930821	0.594565864	1.511871916	0.270482188	0.337865367	0.207399728	0.274947956	0.377355872	0.833000008	0.6408559	0.229374502	0.70547732	0.015470282	0.129083956	0.803707864	0.936820703	0.664689102	1.040597956	0.27077974	0.443590927	0.318371515	0.100045075	0.651278069	0.088740803	1.766567326	0.05853458	0.227103632	0.176822366	0.99054689	0.593010648	0.190844484	1.246547272	0.358748375	0.297649318	0.112982223	0.249567443	0.121296311	0.321462673	0.619107093	0.298399149	0.210703912	0.268632426	0.526010546
E09000012	2012	0.370012331	0.547357585	0.509348163	0.269910024	0.187230197	0.13763005	0.578503552	1.560341584	0.247826335	0.29755341	0.183244011	0.243247235	0.379616928	0.84200673	0.582573012	0.208719995	0.651589442	0.01685578	0.137264065	0.730892773	0.871134959	0.579016663	0.962927319	0.236606644	0.406243234	0.284917522	0.087150136	0.556617749	0.096693177	1.5497578	0.052902501	0.211434546	0.170337194	0.947950877	0.545917513	0.174804288	1.115310042	0.310715173	0.291124473	0.093225906	0.213407938	0.111803935	0.300907628	0.593321443	0.282758586	0.203197686	0.258058875	0.506899471
E09000013	2012	0.4404879	0.619565877	0.573302772	0.303109803	0.201932823	0.157868476	0.634984619	1.567950663	0.267088752	0.331311624	0.200856863	0.297182429	0.447894961	0.86219541	0.671420936	0.233278141	0.75983622	0.024094276	0.139208572	0.806612945	0.943928684	0.669127959	1.063259868	0.262585666	0.469655817	0.32861694	0.106488972	0.662923296	0.092816725	1.785432359	0.05319103	0.232897296	0.184290397	0.998268643	0.586890094	0.188742184	1.523727167	0.387539918	0.305094276	0.090218654	0.246464965	0.110656476	0.32441311	0.721514066	0.321511201	0.215175797	0.282270342	0.569147868
E09000014	2012	0.407784523	0.57736502	0.548532772	0.286751498	0.193259321	0.154254059	0.618474576	1.549946314	0.264327016	0.32724699	0.196190014	0.273461425	0.398165596	0.841067904	0.635264353	0.222225177	0.708908522	0.016464919	0.135795313	0.79166937	0.925484269	0.643014992	1.027938964	0.258801212	0.437082089	0.315287509	0.102561354	0.619791653	0.098252774	1.701183269	0.055104614	0.227931837	0.176764203	0.983380075	0.583225666	0.189406214	1.242229574	0.346197264	0.303350775	0.091152451	0.242187644	0.118606197	0.334974591	0.6049083	0.296739595	0.215089178	0.274103233	0.524801326
E09000015	2012	0.44268857	0.562284336	0.598812616	0.288173261	0.266120207	0.176454276	0.738504332	1.193079686	0.270665017	0.324663596	0.18571806	0.270867655	0.443591605	0.800509612	0.635222118	0.230453428	0.695127193	0.014971213	0.137354758	0.801854523	1.01131204	0.633083867	1.021949331	0.251036644	0.428685857	0.288569449	0.128964724	0.570163133	0.141044257	1.506896049	0.056052355	0.247857774	0.187096765	1.08385269	0.563973606	0.217635137	1.05289133	0.279674159	0.33522011	0.097545702	0.266598568	0.135227363	0.44435594	0.554132727	0.262546605	0.263317879	0.338344293	0.518011802
E09000016	2012	0.501807118	0.605417071	0.617166735	0.358359195	0.192956569	0.192262462	0.654497796	1.599266128	0.314988725	0.400214231	0.247768271	0.346965453	0.401694326	0.846321222	0.770648734	0.264071729	0.844990519	0.016698495	0.118006459	0.940139117	1.006652572	0.829088055	1.205435661	0.33510661	0.532444678	0.381629714	0.127041353	0.839480832	0.079527855	2.234058276	0.06104362	0.250816527	0.213796848	1.069546148	0.688684762	0.211373202	1.612866237	0.47367538	0.316185108	0.105499172	0.31012162	0.130631906	0.364317721	0.750048937	0.342065642	0.230060944	0.288880423	0.563758666
E09000017	2012	0.453312303	0.565182758	0.576573157	0.312101835	0.218969368	0.171651406	0.661474097	1.389368801	0.284443438	0.350529664	0.203407771	0.294003304	0.409664919	0.815356743	0.684617648	0.239687696	0.744630309	0.015661359	0.124938636	0.840410457	0.976574847	0.695510457	1.072103131	0.274002155	0.459300093	0.325108699	0.122663473	0.671125131	0.104732434	1.787404438	0.056500846	0.238647538	0.189085388	1.042585593	0.60867002	0.203906534	1.316386922	0.359874553	0.311696423	0.111549072	0.272416428	0.123616802	0.371881624	0.626487171	0.302774757	0.233338693	0.293919055	0.533847873
E09000018	2012	0.437922421	0.568042236	0.56970288	0.298873204	0.223936585	0.163896769	0.666979591	1.397957663	0.271255244	0.336023127	0.191222681	0.277439827	0.418748508	0.82296058	0.656515092	0.229765313	0.731073446	0.016294472	0.131371124	0.813462009	0.966002393	0.653779432	1.038977259	0.257662739	0.43759265	0.314140606	0.115654136	0.618999248	0.111155417	1.659627669	0.055427981	0.239516625	0.178873522	1.02599627	0.584842177	0.201226756	1.212254968	0.331204207	0.31564037	0.110917076	0.262163715	0.121150238	0.369870239	0.582406777	0.294817083	0.236479166	0.291476323	0.529169323
E09000019	2012	0.432185716	0.609065157	0.568930534	0.292210402	0.203937514	0.155231369	0.642919254	1.577377139	0.265291458	0.331188351	0.195301299	0.296299023	0.445737811	0.863925651	0.666109372	0.22786092	0.756542111	0.022971518	0.13989674	0.792458615	0.922817093	0.663282714	1.044622395	0.259287321	0.457768805	0.327496639	0.105262333	0.646822798	0.095086949	1.76748027	0.052711183	0.228025064	0.182182157	0.975558288	0.579765235	0.185435558	1.456150849	0.381766546	0.306110794	0.080564174	0.243913594	0.112146977	0.327137874	0.701395517	0.312801876	0.214455048	0.277784782	0.557942355
E09000020	2012	0.497241992	0.642420434	0.626188229	0.315565151	0.225933151	0.173892711	0.716710451	1.534407857	0.273050127	0.352356676	0.208503768	0.333653024	0.506490204	0.853233295	0.709667233	0.250141416	0.809437581	0.021428187	0.140156881	0.851165035	0.977832583	0.720943708	1.10810604	0.285899054	0.487722203	0.350078948	0.117912852	0.713083361	0.105820994	1.891697858	0.053631423	0.240938756	0.20120619	1.051985321	0.600589787	0.203416675	1.67532722	0.420265951	0.33349424	0.077289578	0.259293568	0.122519942	0.375406173	0.77182028	0.319470328	0.240996613	0.312831238	0.59075208
E09000021	2012	0.486301887	0.595458874	0.60131513	0.323969234	0.215057701	0.178806054	0.679203387	1.379332654	0.292608259	0.371416753	0.210660682	0.329056542	0.435846632	0.819193691	0.726909525	0.249196832	0.803700663	0.019825816	0.125314753	0.876083184	0.986938966	0.737051572	1.112658428	0.281576752	0.489603867	0.355010273	0.131795096	0.721284424	0.096009989	1.919715354	0.057838304	0.248509052	0.193152937	1.032000328	0.627679159	0.20461501	1.572148882	0.398226889	0.312838841	0.103258705	0.274515949	0.11819383	0.375016251	0.681125329	0.321782383	0.23168917	0.291727623	0.566503882
E09000022	2012	0.398492032	0.614063352	0.537537324	0.286053106	0.185176079	0.145833158	0.580430662	1.615975437	0.257796998	0.316972735	0.198764034	0.274070234	0.397716269	0.847750757	0.635612907	0.222632386	0.711832582	0.01857736	0.136675737	0.77537557	0.911449421	0.643306126	1.026716039	0.255022379	0.456443704	0.312905856	0.093542975	0.6303425	0.080638904	1.754808958	0.054260154	0.223386272	0.174679534	0.968955771	0.580975065	0.181721154	1.383038744	0.367583775	0.29142473	0.087443988	0.232266282	0.10953477	0.294348285	0.665298548	0.311294548	0.203477403	0.26973007	0.541221054
E09000023	2012	0.402068866	0.576113148	0.537224044	0.29317949	0.188667399	0.152287698	0.595185539	1.532775963	0.264095189	0.326741312	0.203532223	0.269225482	0.380977617	0.83826159	0.622222992	0.225041769	0.689973708	0.015435993	0.133932159	0.790895296	0.929369512	0.646272775	1.02976695	0.264546849	0.443049649	0.309228509	0.095234909	0.635772914	0.090727401	1.725151682	0.057213971	0.226699747	0.178092252	0.991553083	0.582482754	0.190392806	1.223997183	0.349237803	0.300944676	0.099913233	0.23991285	0.120277375	0.323166235	0.61559061	0.297398616	0.211857864	0.271313372	0.528171618
E09000024	2012	0.459037849	0.597692805	0.584183701	0.312586361	0.225163116	0.170290373	0.667976619	1.420216252	0.27885714	0.350229085	0.203531602	0.301198369	0.435725041	0.831934973	0.682120057	0.239887598	0.766500403	0.019053272	0.13468327	0.834464369	0.983925014	0.690000406	1.0784037	0.270045223	0.47026329	0.332118763	0.120143547	0.669978172	0.10232205	1.789876469	0.056877226	0.244236666	0.185391928	1.041947195	0.599204662	0.202381397	1.401662486	0.370533778	0.317046819	0.106353636	0.263597163	0.120156393	0.364609255	0.640002193	0.309188665	0.232694271	0.29474727	0.562004355
E09000025	2012	0.345039658	0.479519593	0.497176291	0.233016597	0.226798357	0.13199271	0.624198182	1.303959916	0.235331092	0.267204208	0.155025996	0.193281009	0.372276101	0.831450195	0.519966624	0.186584115	0.556334288	0.011368849	0.144444752	0.682993529	0.896505763	0.496901567	0.863670074	0.205721644	0.337089644	0.238551494	0.090297592	0.444070516	0.129356768	1.17600821	0.052423433	0.215468368	0.155846693	0.955220639	0.487723051	0.188241984	0.664487578	0.199449355	0.312646323	0.111617499	0.210488963	0.120205826	0.358654089	0.463377905	0.228462205	0.233112646	0.281197958	0.461062847
E09000026	2012	0.429940251	0.552117221	0.560050023	0.281797513	0.237090523	0.165942647	0.679040911	1.211606952	0.264333841	0.321255838	0.182634155	0.263819734	0.414523814	0.78787055	0.61962604	0.22783497	0.677922953	0.014639941	0.13033795	0.787592823	0.970713463	0.622875135	0.995076018	0.246452132	0.422596959	0.287515225	0.119438007	0.57659299	0.123911516	1.516339711	0.055130418	0.235878649	0.177407358	1.030475912	0.553013489	0.204269189	1.095272359	0.288935036	0.314774894	0.105342524	0.247027242	0.12215704	0.400439422	0.547713372	0.26456753	0.241690913	0.306152396	0.511693267
E09000027	2012	0.537209447	0.637846468	0.645567105	0.350380212	0.221254157	0.193332667	0.705163464	1.365832782	0.301789317	0.399835579	0.222106844	0.377394642	0.464220107	0.820830369	0.788197969	0.264891053	0.883352138	0.024306806	0.135038701	0.932730699	1.034126376	0.803837923	1.171343661	0.304458688	0.536451743	0.396290949	0.144348136	0.819879127	0.085828665	2.132647876	0.059291385	0.261497167	0.20366044	1.064279473	0.659484102	0.213472513	1.933043092	0.457765742	0.31854486	0.119904175	0.292849902	0.116899345	0.386719049	0.772068087	0.3536154	0.240886355	0.308360043	0.615420152
E09000028	2012	0.403550152	0.592497553	0.535903427	0.288166313	0.19416008	0.147130038	0.595603495	1.586519757	0.258853716	0.318981483	0.197554663	0.272002314	0.398725948	0.855827546	0.628508718	0.221995683	0.697021947	0.018316245	0.138164154	0.771231352	0.921897205	0.632735127	1.022547924	0.252888365	0.442988842	0.304102415	0.093942357	0.615929131	0.090941831	1.700562898	0.055028407	0.224035433	0.176908048	0.975830772	0.572101882	0.18341381	1.280500101	0.352910139	0.298375083	0.096704833	0.231650286	0.113391249	0.309494644	0.657690767	0.30002749	0.209606115	0.270299415	0.542301375
E09000029	2012	0.483564358	0.601691907	0.600507118	0.340599159	0.202443962	0.182890318	0.662563305	1.446301403	0.298310328	0.379814753	0.225695487	0.326215132	0.417420107	0.823849745	0.736031187	0.255465709	0.812831439	0.017064142	0.124036306	0.903076953	1.011942315	0.768368842	1.154519734	0.303098052	0.508738884	0.363351439	0.129401974	0.77671023	0.087004505	2.035324469	0.059583284	0.250589614	0.196720323	1.069330194	0.654264706	0.208989541	1.568874016	0.427857474	0.313785035	0.106446391	0.289992786	0.123332832	0.364580449	0.676482772	0.33910203	0.233971356	0.292158888	0.56804099
E09000030	2012	0.394067907	0.533754566	0.499375898	0.254111521	0.236220517	0.132065509	0.641661331	1.355530261	0.241931877	0.279481706	0.153025092	0.23298946	0.433638704	0.825009186	0.556696596	0.195766166	0.667604202	0.021364466	0.147642926	0.686192873	0.868796788	0.52454976	0.897042614	0.194994598	0.367069183	0.269113216	0.094004995	0.466632328	0.122064331	1.320540825	0.049711593	0.210998231	0.148943961	0.930924317	0.489954551	0.174264542	0.969117064	0.245379244	0.298014964	0.099152711	0.211110369	0.106981468	0.317317397	0.538678155	0.252626153	0.210508993	0.259894061	0.5114073
E09000031	2012	0.404911835	0.556324298	0.539524796	0.283604439	0.202731712	0.155916544	0.616070762	1.435197515	0.256943207	0.318086618	0.189941681	0.256962236	0.386072359	0.809739361	0.611531966	0.217362794	0.67945804	0.014059132	0.133707185	0.780057512	0.933145882	0.626772607	1.002028669	0.256320169	0.426588598	0.302320034	0.102372039	0.610547665	0.103383694	1.623591903	0.05518301	0.226786319	0.173824377	0.994965039	0.567036639	0.192160204	1.14620447	0.324093779	0.302249284	0.102402752	0.245515553	0.119219065	0.340620994	0.571902016	0.284007676	0.219833763	0.280965183	0.510225114
E09000032	2012	0.458855724	0.636706883	0.590406391	0.316174614	0.205273475	0.160919331	0.646542519	1.497975977	0.271749673	0.342049103	0.203336595	0.297378241	0.465226514	0.846690633	0.702680972	0.242652803	0.804754504	0.027555764	0.138525154	0.826502562	0.966780941	0.68903023	1.087530901	0.263214944	0.488984029	0.34490479	0.114299662	0.695982666	0.085487576	1.865900957	0.053828422	0.240948829	0.180502795	1.018858533	0.602342715	0.190964499	1.662967962	0.40772972	0.304927268	0.100068963	0.251501988	0.105316508	0.323898512	0.731222183	0.341979577	0.216461626	0.284481365	0.591142891
E09000033	2012	0.477392185	0.626486054	0.588923371	0.284866723	0.248279483	0.162045488	0.715405665	1.462824704	0.274679136	0.326135336	0.186657452	0.315942911	0.496134869	0.845475735	0.663381833	0.231063162	0.766693159	0.024828093	0.152306482	0.791827521	0.95880488	0.658064552	1.047909705	0.251315636	0.454023246	0.308155821	0.114843331	0.611424783	0.119408751	1.680031245	0.047885311	0.235343278	0.185643072	1.020303391	0.553908918	0.197112373	1.462177808	0.355723857	0.331166362	0.078265341	0.244911165	0.120304872	0.368794488	0.760079844	0.285762938	0.23618934	0.308310828	0.569204274
S12000005	2012	0.506333759	0.598185802	0.622476475	0.356834498	0.180141533	0.196942884	0.643664114	1.746731581	0.313229724	0.406712452	0.252573011	0.373850912	0.388254203	0.804045726	0.771985573	0.261959199	0.858921493	0.015287251	0.105610003	0.942795138	0.956344481	0.861628258	1.217882969	0.353953355	0.532115523	0.386116835	0.127307243	0.855104631	0.070998684	2.299323466	0.056573517	0.248296137	0.224040704	1.015792444	0.690206516	0.208742645	1.738184022	0.498165452	0.310091777	0.08969047	0.327349944	0.130800718	0.36200787	0.833944614	0.327889326	0.228914585	0.279288534	0.528038145
S12000006	2012	0.45639859	0.572903946	0.57024098	0.345559127	0.162808404	0.177348909	0.579581142	1.89391174	0.29383335	0.377719574	0.238622368	0.334742689	0.362087079	0.809866502	0.742443709	0.247031889	0.817497129	0.015032299	0.101450211	0.891365572	0.9210846	0.78453793	1.160666807	0.33789931	0.500194544	0.376843896	0.104512662	0.829938003	0.064364192	2.207079615	0.057365916	0.226837775	0.205949673	1.01938069	0.676857686	0.193137105	1.522559627	0.473632188	0.289772499	0.088570541	0.297871551	0.124720026	0.311519873	0.765716958	0.339252167	0.204234519	0.25352414	0.510286221
S12000008	2012	0.508269305	0.596371661	0.620118603	0.357274775	0.180225629	0.197245006	0.640953826	1.75015434	0.320386492	0.410880105	0.254294369	0.362654644	0.386037801	0.822098828	0.774431876	0.266312611	0.868254914	0.015025537	0.105764693	0.950852719	0.97514816	0.8587591	1.229734417	0.352496228	0.529896516	0.39688374	0.125921115	0.867989518	0.070918791	2.312830393	0.060324416	0.24854915	0.221758045	1.039585365	0.704851275	0.207740274	1.723710847	0.499294315	0.309347286	0.089992546	0.325416267	0.130955878	0.353148225	0.808791919	0.341705963	0.225527869	0.279359497	0.543832615
S12000010	2012	0.508631806	0.597863136	0.610023494	0.3626355	0.181596044	0.194964426	0.634821513	1.681094736	0.317105406	0.409667885	0.247744514	0.356173679	0.387965267	0.809059489	0.775697811	0.262165901	0.864990466	0.014672688	0.105153729	0.946165692	0.987867941	0.843828245	1.216509231	0.344175024	0.528539971	0.398702707	0.125680824	0.864186828	0.069921613	2.290180053	0.059701249	0.250074577	0.216613348	1.050379316	0.70153461	0.206683592	1.737347725	0.49467327	0.302372605	0.102561685	0.312805225	0.126870738	0.345658717	0.792581589	0.34878756	0.222240185	0.274657963	0.553328803
S12000011	2012	0.438000573	0.561625611	0.559593692	0.31919249	0.165980328	0.165853798	0.586306873	1.64192684	0.278021433	0.356029518	0.217130095	0.315502303	0.376091798	0.779330348	0.712890004	0.233785526	0.777602804	0.016889957	0.105238304	0.837401384	0.896182016	0.729363045	1.086302353	0.296967383	0.476442493	0.351556434	0.109703753	0.752125437	0.069709972	2.010302027	0.053762465	0.224822665	0.188250299	0.960379038	0.620900589	0.185004369	1.591590304	0.432374443	0.281167205	0.083583383	0.27305143	0.11226419	0.307341154	0.726246948	0.328690819	0.202867603	0.251902919	0.508175793
S12000013	2012	0.503375138	0.603722982	0.613452933	0.356685676	0.180410078	0.19636108	0.638808079	1.810847451	0.311799471	0.409627909	0.253923037	0.371876422	0.387342049	0.813776179	0.778076294	0.263269372	0.857046615	0.01542707	0.107315435	0.955528072	0.962889995	0.86251809	1.237229605	0.359860986	0.539578358	0.396301316	0.125104384	0.885491054	0.071897321	2.31305696	0.055301494	0.24828526	0.229516589	1.039086189	0.694119689	0.210473731	1.766686655	0.504230718	0.311381412	0.086571235	0.327937213	0.132833429	0.358380114	0.828137177	0.333246826	0.228833716	0.277970069	0.531274217
S12000014	2012	0.493030251	0.598271394	0.60664773	0.35902931	0.174902831	0.18457362	0.627115848	1.809659998	0.312052043	0.406952945	0.244244236	0.351967814	0.386188511	0.838409585	0.774433593	0.25956618	0.860575443	0.015347656	0.105656667	0.932294641	0.969464973	0.825632779	1.206925774	0.339793921	0.518044129	0.393165411	0.120792348	0.844978462	0.069904746	2.278254034	0.059068166	0.244287524	0.210574811	1.043769529	0.703105442	0.203349483	1.695518351	0.490264492	0.301644557	0.102698035	0.313811743	0.125133008	0.332800857	0.798079331	0.351841592	0.217751746	0.266945902	0.541408704
S12000015	2012	0.493487479	0.59465074	0.607012932	0.357517392	0.176189478	0.187528926	0.62774921	1.802922873	0.309527344	0.401370929	0.246930878	0.356812784	0.384322837	0.826729785	0.76660787	0.258977888	0.854154949	0.015414089	0.1060977	0.930087562	0.962370444	0.827943948	1.204321761	0.344839116	0.519618182	0.389473088	0.121047224	0.851727084	0.070211637	2.27392788	0.05874298	0.243981174	0.214024723	1.036000362	0.696575165	0.20397402	1.691368103	0.491525191	0.302532567	0.099562802	0.315899693	0.127538703	0.340482666	0.806806232	0.342939364	0.219645086	0.26961444	0.535261563
S12000017	2012	0.503907014	0.607016525	0.617346003	0.357550912	0.180144446	0.194032618	0.637672132	1.78602059	0.312057139	0.408956214	0.250143709	0.366042198	0.390565477	0.811308217	0.776504268	0.262567062	0.868109058	0.015276384	0.105046658	0.947583529	0.968463428	0.84713986	1.221853548	0.352663041	0.530269813	0.395926868	0.123807912	0.868941742	0.070005084	2.305328848	0.05706123	0.249155275	0.220101584	1.043382223	0.700228822	0.208022786	1.766454126	0.502132287	0.307447972	0.094106632	0.320871687	0.128603876	0.349906476	0.802185895	0.343042172	0.226250534	0.275693441	0.537473013
S12000018	2012	0.494358438	0.604520728	0.615522766	0.360092479	0.173730288	0.190973249	0.629382427	1.913034881	0.315070903	0.409149726	0.255212257	0.367205573	0.382372604	0.85061213	0.783611483	0.264948982	0.867222507	0.015428501	0.105277108	0.949724694	0.966635307	0.847462964	1.233136305	0.355280242	0.53112139	0.400063351	0.118769838	0.867581576	0.069452468	2.334979106	0.059481202	0.243454304	0.222572034	1.048014219	0.713149045	0.206066701	1.65773398	0.503132367	0.309194512	0.089463447	0.327535562	0.133433844	0.337294908	0.828092172	0.346145561	0.220447661	0.270351265	0.536171921
S12000019	2012	0.492206527	0.594611084	0.605433242	0.3535825	0.174872531	0.18731795	0.622872501	1.75950014	0.306742894	0.402440787	0.244274195	0.349852914	0.381934951	0.811068876	0.763583366	0.258604192	0.855037144	0.014616032	0.103508289	0.927434126	0.958252528	0.826073473	1.200517768	0.343965987	0.517212344	0.39122206	0.120952321	0.849445343	0.067681195	2.263623713	0.058185886	0.245271756	0.211080998	1.031913301	0.695416293	0.203827733	1.688303215	0.485748864	0.299558924	0.100200496	0.315018246	0.124921158	0.337286724	0.772830822	0.342038843	0.218981665	0.266935919	0.532775425
S12000020	2012	0.497668162	0.602911377	0.612080178	0.358413197	0.1777422	0.192398825	0.634263192	1.773337875	0.312923583	0.40773085	0.248635378	0.360604865	0.386362195	0.818264367	0.773868636	0.26222166	0.860095188	0.015253231	0.105538808	0.945520445	0.966146173	0.844249973	1.216235245	0.352480473	0.527300841	0.394412425	0.123512183	0.863650235	0.069066867	2.30014754	0.057550205	0.248579734	0.21639471	1.038524923	0.699720359	0.207494955	1.709163467	0.497462302	0.305725456	0.10043066	0.318855581	0.127739147	0.351363568	0.799109149	0.34010157	0.224892562	0.27145943	0.534844335
S12000021	2012	0.499186106	0.597579463	0.613139365	0.359988271	0.175061249	0.191588471	0.629215371	1.868155018	0.316509405	0.405902243	0.256857673	0.362802871	0.380229286	0.842293782	0.772696701	0.264491266	0.861581753	0.01543008	0.10496914	0.944347124	0.965168405	0.847714586	1.227924487	0.358616292	0.527703844	0.395410832	0.119220858	0.876451729	0.06915931	2.325714367	0.060965919	0.243378997	0.221857246	1.049995046	0.709910404	0.206351125	1.657123619	0.498475154	0.308744906	0.094372948	0.327889292	0.133092761	0.343706243	0.816663689	0.341388388	0.221098917	0.27173173	0.53600593
S12000023	2012	0.512015062	0.613098701	0.624775254	0.360671506	0.181331185	0.197848687	0.642719052	1.771049259	0.311537723	0.415666394	0.252798439	0.37755128	0.39852902	0.80233821	0.796745059	0.267151774	0.880413477	0.015478647	0.105072163	0.965943097	0.972714551	0.857569905	1.237888847	0.3613336	0.540555158	0.404712426	0.126954508	0.889990294	0.069858485	2.339975002	0.057541269	0.25130571	0.225262031	1.036326315	0.703328455	0.21052913	1.821143033	0.513660975	0.307394237	0.090407769	0.325240918	0.129414072	0.358133462	0.839412173	0.34307903	0.229380553	0.275772905	0.543783837
S12000024	2012	0.515539807	0.60476785	0.62371172	0.35891122	0.185922462	0.197353855	0.649915147	1.753142964	0.314611932	0.411615125	0.252539707	0.368307896	0.395422114	0.810187108	0.779556247	0.263592	0.870245104	0.015632816	0.106367677	0.955254913	0.974449701	0.857359565	1.228736229	0.355406762	0.538364079	0.394774416	0.126971378	0.874245212	0.071939054	2.319619084	0.057447131	0.25026627	0.223562394	1.050826984	0.700045084	0.211082157	1.756751572	0.504428904	0.311963417	0.090997566	0.322239305	0.130407948	0.359685819	0.808668229	0.343860639	0.230520225	0.282258706	0.543302315
S12000026	2012	0.518805976	0.613540828	0.628380269	0.358843237	0.184900872	0.201291823	0.651379031	1.774020741	0.314618429	0.412947279	0.257124574	0.375664368	0.393824408	0.808756467	0.780905151	0.265617267	0.877113761	0.015297293	0.105403861	0.964576811	0.975348515	0.871143024	1.243050266	0.365504913	0.543628779	0.401609474	0.125902285	0.890899293	0.071147051	2.351184691	0.057978028	0.251451533	0.229350647	1.05727986	0.706388689	0.213588256	1.788284063	0.51329293	0.315876355	0.08768139	0.329546277	0.133486711	0.364458235	0.824073266	0.339856752	0.232797337	0.287979148	0.540393764
S12000027	2012	0.489590481	0.584410965	0.593968404	0.346857066	0.178712784	0.184299732	0.616306443	1.662407108	0.302846153	0.394313983	0.232848021	0.350063726	0.389162728	0.78220101	0.760830694	0.25556029	0.85454577	0.015236596	0.109074206	0.912425379	0.950066045	0.809738539	1.168089288	0.326838878	0.508795869	0.376586218	0.127293183	0.824407068	0.069050857	2.194876271	0.056158893	0.240218966	0.200734437	0.999128891	0.669155311	0.197940459	1.786936374	0.478792138	0.291654504	0.096951837	0.303510814	0.118370647	0.334183382	0.793231787	0.345837832	0.219726326	0.266198138	0.532223003
S12000028	2012	0.5214822	0.615473199	0.632898943	0.367128483	0.187080683	0.202511935	0.654444441	1.767788666	0.318137935	0.412130337	0.260276619	0.381536239	0.39905935	0.820883868	0.794768372	0.269340739	0.879852326	0.017005171	0.108925712	0.970667938	0.99160822	0.872204942	1.239413937	0.360998789	0.551017736	0.398048064	0.130454019	0.89450761	0.071371027	2.371251159	0.058646161	0.253358336	0.227300699	1.064290399	0.71017392	0.212611103	1.820790337	0.513979013	0.315390648	0.091937779	0.330748707	0.132240617	0.370553921	0.85469413	0.343278979	0.232355272	0.287329241	0.553461414
S12000029	2012	0.501257276	0.606471213	0.613045825	0.357816573	0.178664926	0.188554525	0.635961165	1.763969939	0.310392025	0.404907257	0.245196339	0.357666286	0.393303609	0.824419389	0.77891502	0.260133771	0.863602481	0.015993191	0.107135207	0.93420689	0.972325557	0.829386349	1.207808712	0.33984653	0.525256461	0.393719267	0.124509025	0.852526072	0.071306764	2.277976792	0.058090058	0.248651149	0.214714392	1.045171813	0.701085337	0.204411046	1.762037926	0.494101518	0.302281724	0.099585631	0.312723436	0.125614019	0.339269107	0.803312944	0.351760014	0.222205643	0.272583913	0.543720566
S12000030	2012	0.495104788	0.592004168	0.603358766	0.347551235	0.179541781	0.189525669	0.632260235	1.720127289	0.307427216	0.394528034	0.243993865	0.354363297	0.387467681	0.81130499	0.759797261	0.25622621	0.84326814	0.015767945	0.107454599	0.919535035	0.963688769	0.822966903	1.193169719	0.338258891	0.516850706	0.388370678	0.120214062	0.842205284	0.072893985	2.224124855	0.058677296	0.244016374	0.215240867	1.018713936	0.687412287	0.203080243	1.730267887	0.480844027	0.303386532	0.089230189	0.312623715	0.127507809	0.343048955	0.786226783	0.337902362	0.221202141	0.280348519	0.541678479
S12000033	2012	0.458853667	0.581003932	0.57706435	0.338932679	0.17402381	0.169346986	0.607492814	1.766702154	0.291421012	0.374796354	0.225878724	0.330426918	0.388533556	0.839270715	0.743097093	0.245168273	0.805694082	0.017391846	0.110533782	0.875228211	0.932332367	0.76471078	1.133816335	0.305526528	0.492368266	0.360871503	0.116079385	0.780135613	0.072488007	2.114381552	0.054850755	0.234419449	0.196015164	0.992136381	0.651503712	0.192870471	1.658022171	0.450349884	0.292004714	0.098327514	0.288565031	0.117666711	0.3208585	0.770187466	0.340281483	0.208206831	0.259617323	0.530666954
S12000034	2012	0.499845598	0.602481351	0.608257455	0.358084877	0.178361749	0.189009919	0.633863996	1.684614868	0.310111013	0.404103046	0.240403568	0.358610874	0.392515048	0.811004585	0.774959484	0.260702542	0.865512501	0.016299815	0.108841181	0.935760021	0.972267603	0.823713908	1.200829001	0.337134192	0.521254544	0.396089797	0.127181204	0.856295093	0.070363241	2.258940837	0.057422549	0.248953327	0.209283633	1.031720635	0.693261412	0.204040517	1.827873013	0.491611303	0.298636539	0.10821453	0.308725122	0.121781513	0.345461225	0.786683046	0.348226772	0.219765854	0.273323998	0.551480029
S12000035	2012	0.526049118	0.620180128	0.637401893	0.362810392	0.187901877	0.205140694	0.659502325	1.776448635	0.317257451	0.415238566	0.261003161	0.387116751	0.398130171	0.807361761	0.790117908	0.270440835	0.884402812	0.016074786	0.107242999	0.978192551	0.980934085	0.880096403	1.254046362	0.371646304	0.552962622	0.404769026	0.128774673	0.905346485	0.072079665	2.374397768	0.058146242	0.253142316	0.234250282	1.067094477	0.710493161	0.21510527	1.829906116	0.521466205	0.31971682	0.083876185	0.333088106	0.134829219	0.371821546	0.849276045	0.338567315	0.237140606	0.290182083	0.545929759
S12000036	2012	0.504385322	0.614500491	0.62620529	0.351988137	0.187513854	0.191189617	0.66088773	1.733023291	0.310129896	0.404622586	0.243305245	0.36881005	0.407865917	0.839186567	0.781230855	0.261763049	0.865829901	0.01698168	0.114410185	0.945037128	0.982362802	0.835560191	1.20900751	0.339009921	0.527100199	0.391784676	0.13090841	0.844281639	0.078004654	2.246204939	0.057535786	0.252337365	0.216311734	1.047316102	0.694866036	0.209387499	1.819088506	0.487269471	0.312922751	0.094495797	0.319553963	0.12784636	0.35964904	0.808438051	0.345362803	0.230864546	0.287250908	0.554458283
S12000038	2012	0.491917651	0.598005191	0.608182215	0.353745627	0.176409496	0.186480461	0.629521414	1.795641077	0.309642524	0.399366342	0.244730543	0.355400643	0.38903448	0.838747498	0.776469702	0.25966692	0.852092077	0.015777154	0.106486346	0.930074526	0.965133516	0.822692437	1.200851379	0.339708875	0.521468093	0.386543669	0.120105394	0.846138831	0.071599632	2.260112573	0.058583692	0.243687575	0.214033738	1.041953084	0.697210495	0.203573848	1.700928804	0.489164703	0.303653987	0.095359729	0.312615502	0.127060596	0.335962238	0.79711721	0.348765845	0.219568162	0.268875787	0.538868173
S12000039	2012	0.482822909	0.596663276	0.605568135	0.360184714	0.170300157	0.183814503	0.623026075	1.881025669	0.312183167	0.402942966	0.248749004	0.357990897	0.381080042	0.858570908	0.783152407	0.261770593	0.855638211	0.015765431	0.105879673	0.934112898	0.961853165	0.828554215	1.211896148	0.344883947	0.517570223	0.39195354	0.117571999	0.848514058	0.069616406	2.292056503	0.058918148	0.241420773	0.212908681	1.037842847	0.705904746	0.202558719	1.644368554	0.490937816	0.302391818	0.099881389	0.32015712	0.128956789	0.32950331	0.81730507	0.34524761	0.214914627	0.262827614	0.534920631
S12000040	2012	0.473169697	0.588676067	0.5890818	0.347138739	0.168658981	0.177692159	0.610479803	1.751096738	0.305378567	0.396859056	0.234260112	0.339604964	0.377633873	0.823626955	0.756045669	0.254491043	0.840380071	0.014993105	0.105855608	0.910467305	0.952548679	0.793076552	1.177322451	0.328112763	0.498365199	0.387195957	0.117364541	0.819344711	0.069333528	2.195362591	0.058801977	0.241148218	0.200593486	1.013910168	0.691367967	0.198157458	1.665606312	0.472064672	0.292365718	0.104956927	0.302844554	0.121170607	0.321632869	0.751481056	0.346573837	0.21097463	0.258539899	0.535573241
S12000041	2012	0.510530504	0.600257874	0.6165753	0.359391969	0.182401187	0.19492511	0.639247574	1.777053209	0.314414988	0.409014481	0.253592619	0.362653464	0.389433142	0.813251272	0.776195363	0.263415103	0.869207506	0.015210373	0.103862064	0.946500558	0.968570695	0.855825252	1.22496766	0.355583053	0.534652653	0.395190527	0.124675062	0.877826484	0.06819209	2.330933364	0.057505602	0.248758332	0.221270414	1.046973511	0.701968874	0.209343487	1.72445379	0.503020137	0.30842485	0.09368492	0.321958302	0.128774912	0.352194323	0.811227102	0.342522419	0.226918451	0.275221824	0.536967948
S12000042	2012	0.48800673	0.596596177	0.611243724	0.360370154	0.177207334	0.189881261	0.633976066	1.857066309	0.315053601	0.40334735	0.253044729	0.350350276	0.382727659	0.858298097	0.770962961	0.262738251	0.845931499	0.014834649	0.107552732	0.941835043	0.972758134	0.837567364	1.225524063	0.351671176	0.520738077	0.387463164	0.117702208	0.859723424	0.073405624	2.282291804	0.060026919	0.245880245	0.217690275	1.05537051	0.705686231	0.208630056	1.606694781	0.489605612	0.310668643	0.100981281	0.323507022	0.133775401	0.345493988	0.79562683	0.343311265	0.222718026	0.272458914	0.534882477
S12000044	2012	0.480179444	0.58878849	0.595800699	0.356224968	0.168430508	0.179928736	0.611232525	1.839651998	0.310175585	0.400172351	0.241904274	0.345529089	0.37640893	0.846726984	0.767879084	0.257220596	0.849503994	0.015175259	0.104315486	0.917487322	0.959234402	0.810096709	1.191972143	0.33569788	0.506175268	0.389927396	0.116415042	0.832585177	0.068010959	2.252583929	0.06058972	0.239061347	0.206774902	1.027782056	0.70201727	0.198745596	1.638062567	0.481967279	0.295773558	0.105935324	0.310922829	0.124795129	0.319851783	0.786868965	0.350829291	0.210410492	0.258288249	0.536973359
S12000045	2012	0.513463715	0.607142363	0.621040082	0.355823191	0.188382635	0.196906235	0.651925799	1.679772496	0.309975912	0.406644009	0.248419736	0.361878474	0.398913219	0.802985926	0.775324785	0.262315378	0.865837621	0.016048497	0.110032726	0.944833608	0.991226584	0.840350099	1.214573048	0.34595098	0.537081967	0.394111175	0.129626706	0.868467802	0.07447048	2.275790599	0.058680356	0.251439772	0.217970652	1.06726379	0.694938411	0.209922716	1.792677493	0.49261431	0.310074671	0.094537225	0.314477018	0.127918627	0.359535732	0.802760284	0.346283748	0.231325286	0.285085592	0.552618747
S12000046	2012	0.432745446	0.564338248	0.565286077	0.326120817	0.164788614	0.165145132	0.597248653	1.873834741	0.288452526	0.367291963	0.224922997	0.321503962	0.371853934	0.856059458	0.721478696	0.235325808	0.778933765	0.015295929	0.109474232	0.859228397	0.911611644	0.746395333	1.118555852	0.307191548	0.472771787	0.35532713	0.102658271	0.736590311	0.078255038	2.036255723	0.055257978	0.225661093	0.199078366	0.976552265	0.650352078	0.190294068	1.433344069	0.428831843	0.294013876	0.085724054	0.289763589	0.125894401	0.305858811	0.730166637	0.3254216	0.204783196	0.251507156	0.506172915
W06000001	2012	0.49907475	0.581106447	0.602115895	0.354210858	0.179528481	0.19499551	0.622328583	1.69673966	0.306646526	0.398760615	0.248760236	0.357096733	0.375379329	0.777615857	0.757071906	0.25714457	0.844848418	0.014420112	0.10055582	0.922510052	0.941365567	0.839796966	1.195881565	0.351154428	0.523727664	0.382235244	0.119698434	0.852750835	0.067124025	2.257561463	0.054809036	0.240501223	0.218509492	1.021349116	0.674159696	0.204989463	1.675789513	0.494718351	0.304031835	0.092786181	0.314471314	0.12673976	0.350228666	0.776108188	0.329181425	0.222946141	0.274923426	0.51654418
W06000002	2012	0.476346031	0.569424754	0.581305461	0.350855678	0.17042753	0.186913862	0.601658344	1.737211124	0.303178919	0.386510598	0.240402464	0.347786549	0.366718376	0.785847966	0.738787059	0.250157517	0.813971966	0.014612511	0.101250366	0.907092585	0.921165406	0.814957463	1.169399789	0.341314303	0.508374956	0.373836956	0.114430285	0.828986474	0.067190415	2.205025884	0.054851934	0.234750114	0.214690805	0.990955598	0.663419562	0.199419771	1.591230286	0.477534862	0.296998108	0.096305905	0.308209095	0.125910952	0.338482083	0.75924627	0.323704789	0.215057464	0.265994996	0.511532139
W06000003	2012	0.505499239	0.585158329	0.61148247	0.357144688	0.183343038	0.199276175	0.635380786	1.68755081	0.308303334	0.401716534	0.25224206	0.365528339	0.380438903	0.785841531	0.761247986	0.258863476	0.843548521	0.014683433	0.101274618	0.940417073	0.94733091	0.857347104	1.207607034	0.360299875	0.533257689	0.381640487	0.120664188	0.867721329	0.068943769	2.291364158	0.055735311	0.243528439	0.223222704	1.026916159	0.678268469	0.210231789	1.640212272	0.494550126	0.309000837	0.090061003	0.319694505	0.131158633	0.362271424	0.794127958	0.323234946	0.229422751	0.279089581	0.521856856
W06000004	2012	0.489065602	0.580242384	0.59564427	0.350096427	0.175687354	0.191639302	0.618404325	1.700150423	0.305993103	0.396496775	0.246788449	0.352311654	0.372093296	0.784809422	0.751781672	0.257374706	0.833776833	0.014134739	0.101453774	0.925357224	0.940863686	0.834045232	1.189576539	0.348944699	0.517739608	0.38197496	0.118081134	0.84668477	0.067970014	2.238576189	0.055888703	0.240178637	0.217029806	1.014819154	0.678893707	0.203663286	1.61535581	0.487118232	0.302050214	0.090872128	0.316650457	0.127945272	0.346529098	0.771551957	0.3248147	0.222276266	0.270337067	0.515154231
W06000005	2012	0.480120492	0.576305873	0.587084451	0.347937755	0.170041166	0.183702448	0.606923486	1.695823156	0.305276663	0.393766734	0.240581408	0.340355893	0.369439614	0.798266576	0.749997742	0.254909663	0.83464717	0.014087836	0.100197364	0.910447187	0.939201359	0.812818557	1.183302527	0.337745626	0.50719577	0.381875529	0.116795342	0.840955226	0.066190374	2.213994169	0.057243415	0.238737322	0.207733639	1.003422299	0.680362535	0.199727349	1.605523898	0.480694238	0.292371763	0.098851844	0.306757588	0.122340048	0.328878849	0.746102028	0.339524453	0.212937291	0.262915625	0.522177128
W06000006	2012	0.468304683	0.563818944	0.57568927	0.343031922	0.16829725	0.177331335	0.599058452	1.69624037	0.298034074	0.384782199	0.232934586	0.329471216	0.36554287	0.796327928	0.732319948	0.247361542	0.813350935	0.013825456	0.100307277	0.883155324	0.927701569	0.788068588	1.150574653	0.325491978	0.490932504	0.370609901	0.113489688	0.802424998	0.067634314	2.144722544	0.056940534	0.233247523	0.201166109	0.986974702	0.662525386	0.196190889	1.53954932	0.462390443	0.288485227	0.10302526	0.29985185	0.120675893	0.322273507	0.735063892	0.331881676	0.208775222	0.258383998	0.513395175
W06000008	2012	0.473537099	0.570109692	0.586867128	0.340763037	0.17148444	0.191956158	0.608154957	1.705437126	0.296883976	0.385924801	0.245054461	0.349216852	0.365685001	0.768392138	0.725309863	0.247887081	0.816199267	0.014129957	0.101448395	0.900762047	0.917737648	0.821884908	1.175168591	0.345268793	0.505615915	0.373719563	0.112412529	0.836463629	0.068256601	2.185141639	0.054509726	0.234966442	0.219515778	0.988166386	0.655613668	0.200285395	1.586547758	0.476032333	0.299860326	0.079467575	0.310909312	0.127923845	0.344367592	0.76826624	0.313151284	0.219777173	0.272213855	0.499665136
W06000009	2012	0.496122893	0.586178972	0.601696552	0.349064301	0.177746477	0.196527999	0.621922871	1.689599284	0.305675314	0.39479775	0.247206443	0.358764536	0.374465804	0.777550991	0.75619006	0.257004784	0.842484346	0.014333507	0.102027451	0.928331455	0.940950986	0.841092799	1.191548151	0.355684973	0.522724659	0.384995841	0.119239362	0.863422545	0.067063068	2.258577051	0.055900308	0.240391963	0.221138552	1.018864797	0.68008549	0.203749209	1.658121444	0.494000877	0.3049521	0.090617141	0.318672454	0.128321871	0.352573226	0.772744358	0.326089403	0.22339465	0.27853505	0.516571808
W06000010	2012	0.488463444	0.577499277	0.593699629	0.350740922	0.174794771	0.191074997	0.615175752	1.701217025	0.307158447	0.393973103	0.246860794	0.350485176	0.371573335	0.792370024	0.751513475	0.255099443	0.833509775	0.014175857	0.100987137	0.920885607	0.939645827	0.831683029	1.189348675	0.347693649	0.517009592	0.380578243	0.117021348	0.85040318	0.066838004	2.241028564	0.056463158	0.23941	0.216104855	1.010745544	0.678685779	0.202704419	1.612816806	0.487402357	0.300531832	0.09433408	0.314368953	0.127328207	0.343261499	0.761680332	0.328131092	0.218917886	0.269591397	0.517302006
W06000011	2012	0.456091821	0.555514717	0.570371461	0.332054924	0.167792726	0.177527509	0.598146444	1.7053345	0.294996301	0.377165235	0.23381156	0.328494499	0.362350391	0.802036355	0.718724469	0.243881449	0.793092878	0.014364109	0.103404377	0.879424821	0.908915398	0.779186925	1.13986715	0.324121353	0.486435052	0.3630455	0.108766607	0.788903495	0.069708388	2.112630127	0.055910432	0.229393143	0.203387367	0.975008572	0.652768369	0.194771248	1.481901063	0.450765754	0.292518847	0.0861322	0.298002569	0.123214586	0.325665804	0.726192289	0.320012924	0.210125916	0.259390557	0.504559289
W06000012	2012	0.481420409	0.580153961	0.593381419	0.353286494	0.170287648	0.185888615	0.60952615	1.799234827	0.309593516	0.397337605	0.246377801	0.348510378	0.370826823	0.825617559	0.756588454	0.25666181	0.840377469	0.014618946	0.103854876	0.920648459	0.942179682	0.826758498	1.197580261	0.346209192	0.513282909	0.384008151	0.115965026	0.85016365	0.067262706	2.263860722	0.057962033	0.237786524	0.212805917	1.017856879	0.691182279	0.200594496	1.588789356	0.486993184	0.300770588	0.09555144	0.317374839	0.126550232	0.333167647	0.765537627	0.339018844	0.213830808	0.263984953	0.524151806
W06000013	2012	0.48095998	0.579674227	0.59346672	0.349827171	0.17097998	0.184537179	0.612399472	1.76858484	0.308345747	0.398235497	0.243836842	0.345037194	0.372384604	0.822236419	0.75424571	0.256989215	0.83897927	0.01473161	0.103938371	0.919657655	0.940425279	0.818219023	1.190587785	0.341894033	0.508195346	0.385072481	0.116680214	0.83718273	0.067745066	2.244357111	0.058571871	0.237657686	0.209640834	1.012755713	0.690358933	0.200104643	1.58269278	0.483807856	0.297746052	0.09601878	0.3123839	0.125765981	0.332044131	0.764509271	0.336320085	0.21397023	0.261570841	0.526211744
W06000014	2012	0.485304653	0.582486989	0.596333817	0.346798793	0.17379322	0.188323563	0.619384031	1.670310054	0.305345808	0.395341865	0.242223436	0.349064569	0.377697043	0.796715458	0.755313018	0.257194037	0.838405233	0.015107678	0.105048094	0.918140575	0.94897891	0.821087275	1.183154804	0.339332063	0.514935196	0.38274082	0.12173274	0.842108614	0.068435729	2.21780539	0.056778737	0.241345295	0.208568492	1.013934991	0.678033971	0.20123739	1.657594353	0.479288995	0.298017739	0.096190046	0.312584145	0.123648879	0.342245233	0.764643198	0.334375992	0.21824845	0.267845529	0.529331389
W06000015	2012	0.411525842	0.527133979	0.532425339	0.308621766	0.161058563	0.15892824	0.56765619	1.606382544	0.273597893	0.345208998	0.20819038	0.291817775	0.353994451	0.783714964	0.670621945	0.226941098	0.734384957	0.014364161	0.10591603	0.808000814	0.874963131	0.698231935	1.050499928	0.282440835	0.445691031	0.332562344	0.101598019	0.695966412	0.072886523	1.887080304	0.052696891	0.218000123	0.180045356	0.923999585	0.605981682	0.181497548	1.381552377	0.397062286	0.277981105	0.090277915	0.269639038	0.112530276	0.302556248	0.654443522	0.311836703	0.197241743	0.245206489	0.489472005
W06000016	2012	0.464271957	0.567099111	0.576517931	0.344839641	0.164428829	0.179161821	0.592321662	1.768343207	0.301003362	0.385609051	0.238334139	0.336019144	0.359698128	0.811164457	0.734547944	0.248314804	0.819303438	0.014000108	0.102290991	0.888450661	0.927837765	0.797289034	1.160223905	0.332334501	0.493296039	0.377540167	0.110518763	0.812672811	0.066693629	2.177231272	0.058213125	0.230854321	0.205393596	0.992312303	0.675113811	0.194204439	1.531297486	0.468445018	0.291439734	0.098326967	0.3066702	0.124470712	0.319898703	0.745890643	0.331052101	0.207233707	0.258402114	0.512650948
W06000018	2012	0.468509035	0.568777929	0.578614874	0.352869198	0.164834851	0.178701064	0.594932878	1.780685004	0.30723049	0.392043254	0.241120566	0.334474962	0.361022956	0.830210491	0.744630347	0.254072935	0.826066879	0.013946058	0.102334742	0.900675134	0.939050985	0.803639883	1.175680035	0.335106323	0.49702914	0.38058485	0.111725007	0.826816699	0.065855992	2.211145266	0.059399862	0.234019354	0.205075615	1.005652338	0.687868632	0.19629916	1.527987181	0.472299512	0.29195235	0.107154769	0.308418576	0.124263417	0.321817419	0.740340837	0.338070698	0.20726433	0.255976228	0.518871926
W06000019	2012	0.462538903	0.568419484	0.581718271	0.350851319	0.162253871	0.17986315	0.589542027	1.843870448	0.304059795	0.389610234	0.243613899	0.336831236	0.355547102	0.826550653	0.74488436	0.249715329	0.828096087	0.013883266	0.101786452	0.894664926	0.926980897	0.813622293	1.178839923	0.338759725	0.499779948	0.37631443	0.110415164	0.82646722	0.06516864	2.231630421	0.058887493	0.231269727	0.207234232	0.998561592	0.686685718	0.195328512	1.511224182	0.474517124	0.294096979	0.096124845	0.314532617	0.12737644	0.313292123	0.778715475	0.333120203	0.206989297	0.25332527	0.507171714
W06000020	2012	0.466677609	0.563057247	0.580241972	0.346344584	0.165593202	0.181934566	0.594565806	1.769052174	0.302491772	0.389305103	0.241913603	0.33226635	0.360356609	0.806832038	0.742654654	0.251792509	0.820725231	0.013909835	0.099531152	0.89633041	0.925397422	0.8108628	1.170775154	0.335763305	0.499718235	0.372583296	0.112703069	0.82421585	0.065881043	2.212383218	0.057304643	0.232445662	0.206863688	1.000337857	0.678752693	0.196939043	1.516581589	0.468015254	0.293225477	0.097539698	0.308117557	0.125114383	0.318966915	0.748606074	0.332183664	0.209249289	0.254799082	0.508729915
W06000021	2012	0.51290336	0.599125049	0.61892998	0.35022275	0.185143705	0.201184733	0.645375456	1.600780334	0.3085897	0.402270175	0.248242756	0.369098728	0.389898652	0.783691219	0.771265282	0.262188137	0.860718945	0.015900443	0.107035983	0.945954754	0.967250812	0.848905855	1.205281954	0.351507746	0.532935427	0.393702201	0.128311014	0.871459981	0.070861492	2.27425006	0.05702621	0.248501285	0.222397828	1.031309385	0.683868394	0.207755184	1.794331666	0.498701854	0.307053518	0.090740386	0.319295316	0.12707882	0.365967265	0.789905491	0.332476973	0.229468886	0.287845826	0.54376046
W06000022	2012	0.447369152	0.548408696	0.560577507	0.332648284	0.166351984	0.171424644	0.589424711	1.650178824	0.291227233	0.371454706	0.225007746	0.31402431	0.357686276	0.796484086	0.712114703	0.241545164	0.781020227	0.013709868	0.102968691	0.862509226	0.911583127	0.757939147	1.116366527	0.311770668	0.474592552	0.354192584	0.108792994	0.764271721	0.071291411	2.058755527	0.055632519	0.227259657	0.194817222	0.969747667	0.648504927	0.191445373	1.449376321	0.437882152	0.286542019	0.104063503	0.289748784	0.120203893	0.317161174	0.70217242	0.321346773	0.206431146	0.255054362	0.501361866
W06000023	2012	0.508182902	0.595877364	0.612475486	0.348218567	0.182814468	0.200839817	0.634442406	1.658550258	0.30348629	0.398607502	0.248603039	0.366446272	0.381969123	0.764265409	0.763619538	0.25926017	0.854584727	0.014796003	0.102534697	0.938197794	0.947053783	0.85434555	1.204414898	0.356897554	0.531122102	0.389698557	0.121972767	0.86746514	0.068623683	2.273472302	0.054116105	0.245718114	0.223970612	1.025640165	0.678243365	0.208253227	1.753037458	0.499290719	0.3080422	0.084480965	0.320803667	0.128512968	0.360944363	0.786392581	0.326358152	0.230647995	0.285834829	0.520506638
W06000024	2012	0.461373257	0.568519866	0.575310125	0.346242381	0.164927933	0.178266354	0.593206048	1.786654073	0.300399147	0.380679838	0.237711192	0.329113895	0.36085941	0.822866513	0.738833409	0.249111403	0.815831635	0.013831126	0.100661939	0.888821141	0.928496908	0.797940012	1.160326526	0.331996043	0.496537716	0.371944866	0.110084963	0.816447496	0.067050791	2.182960957	0.058113186	0.231551657	0.204439189	0.999302838	0.679933964	0.194829472	1.508970048	0.464470527	0.292028717	0.105498849	0.306055063	0.125049421	0.316635084	0.737555758	0.336434928	0.206800452	0.255924323	0.512042992
[truncated: 58 more columns]
